# Supplementary material for: Latent brain subtypes of chronotype reveal unique behavioral and health profiles: an across-cohort validation
Source: Research Square preprint supplement (doi:10.21203/rs.3.rs-7032529/v1), 2025-07-29
Supplement: Supplementary file 1 [file bc484ca8c1e162ccaf4cc7f1.docx]

## Supplementary Information


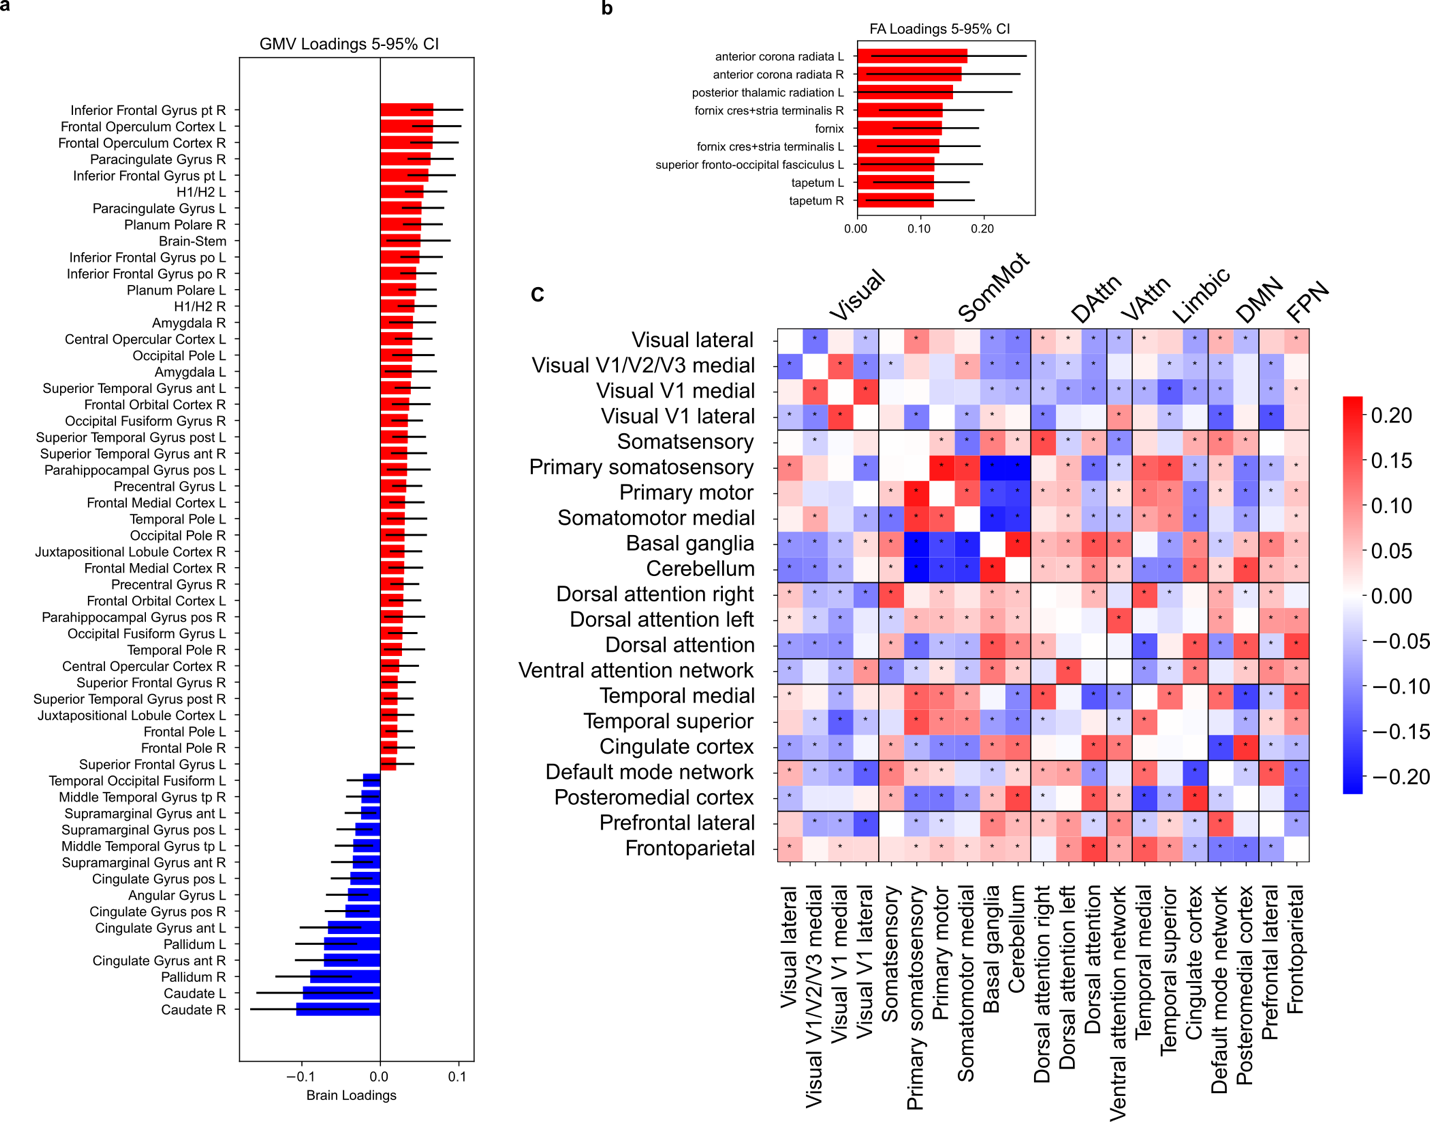


**Supplementary Fig 1**. Significant brain features derived from 1000 bootstrap iterations with 5-95% confidence interval. **a)** the significant GMV loadings. **b)** significant FA loadings. **c)** significant resting-state fMRI loadings was indicated by asterisk (*).


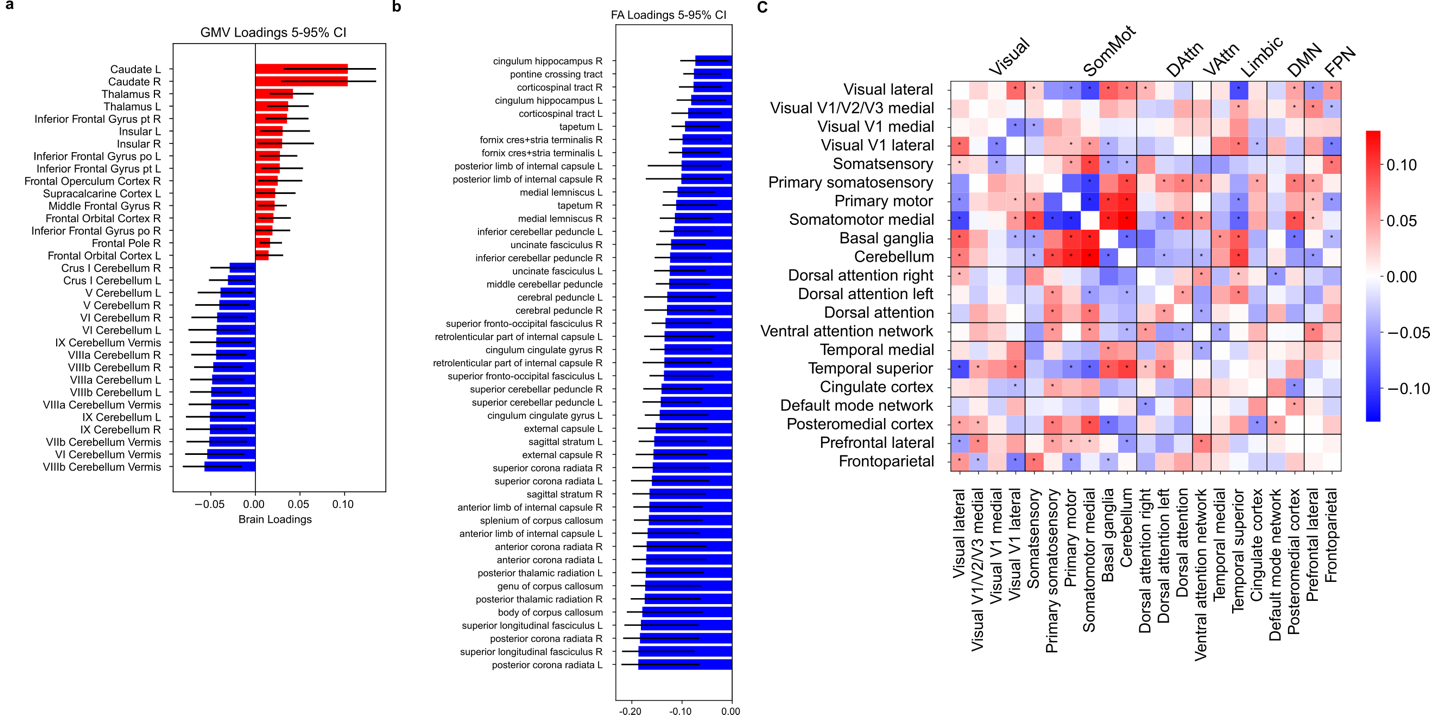


**Supplementary Fig 2**. Significant brain features derived from 1000 bootstrap iterations with 5-95% confidence interval. **a)** the significant GMV loadings. **b)** significant FA loadings. **c)** significant resting-state fMRI loadings was indicated by *.


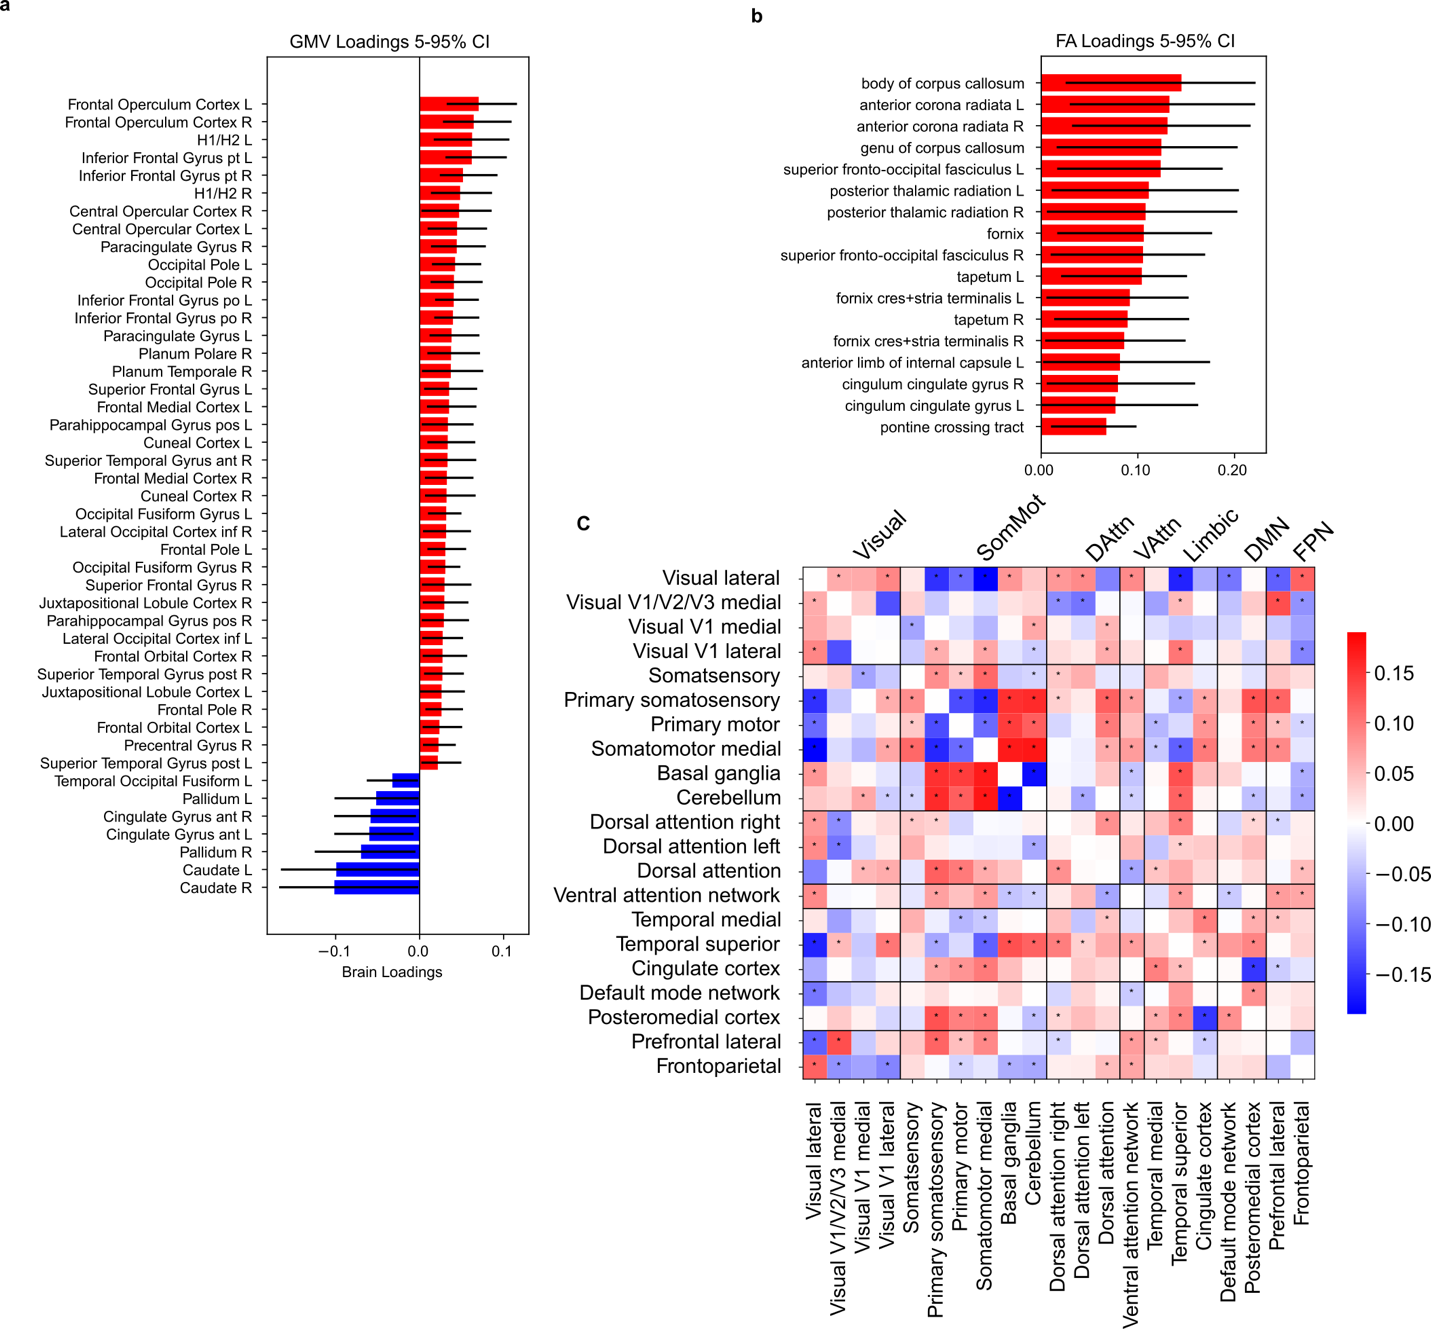


**Supplementary Fig 3**. Significant brain features derived from 1000 bootstrap iterations with 5-95% confidence interval. **a)** the significant GMV loadings. **b)** significant FA loadings. **c)** significant resting-state fMRI loadings was indicated by *.


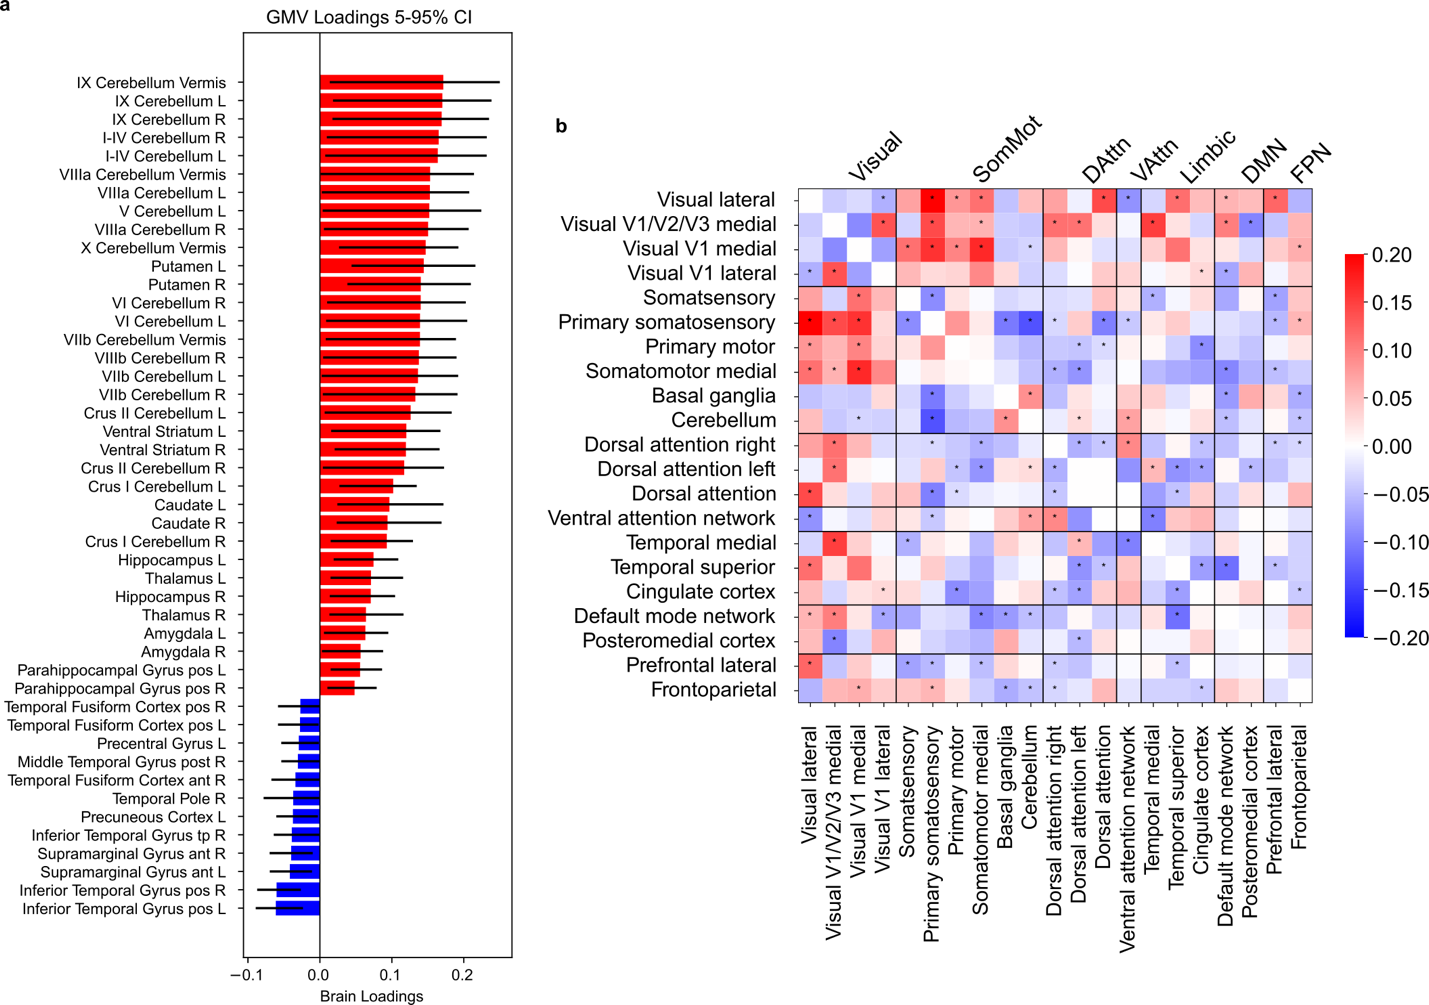


**Supplementary Fig 4**. Significant brain features derived from 1000 bootstrap iterations with 5-95% confidence interval. **a)** the significant GMV loadings. **b)** significant FA loadings. **c)** significant resting-state fMRI loadings was indicated by *.


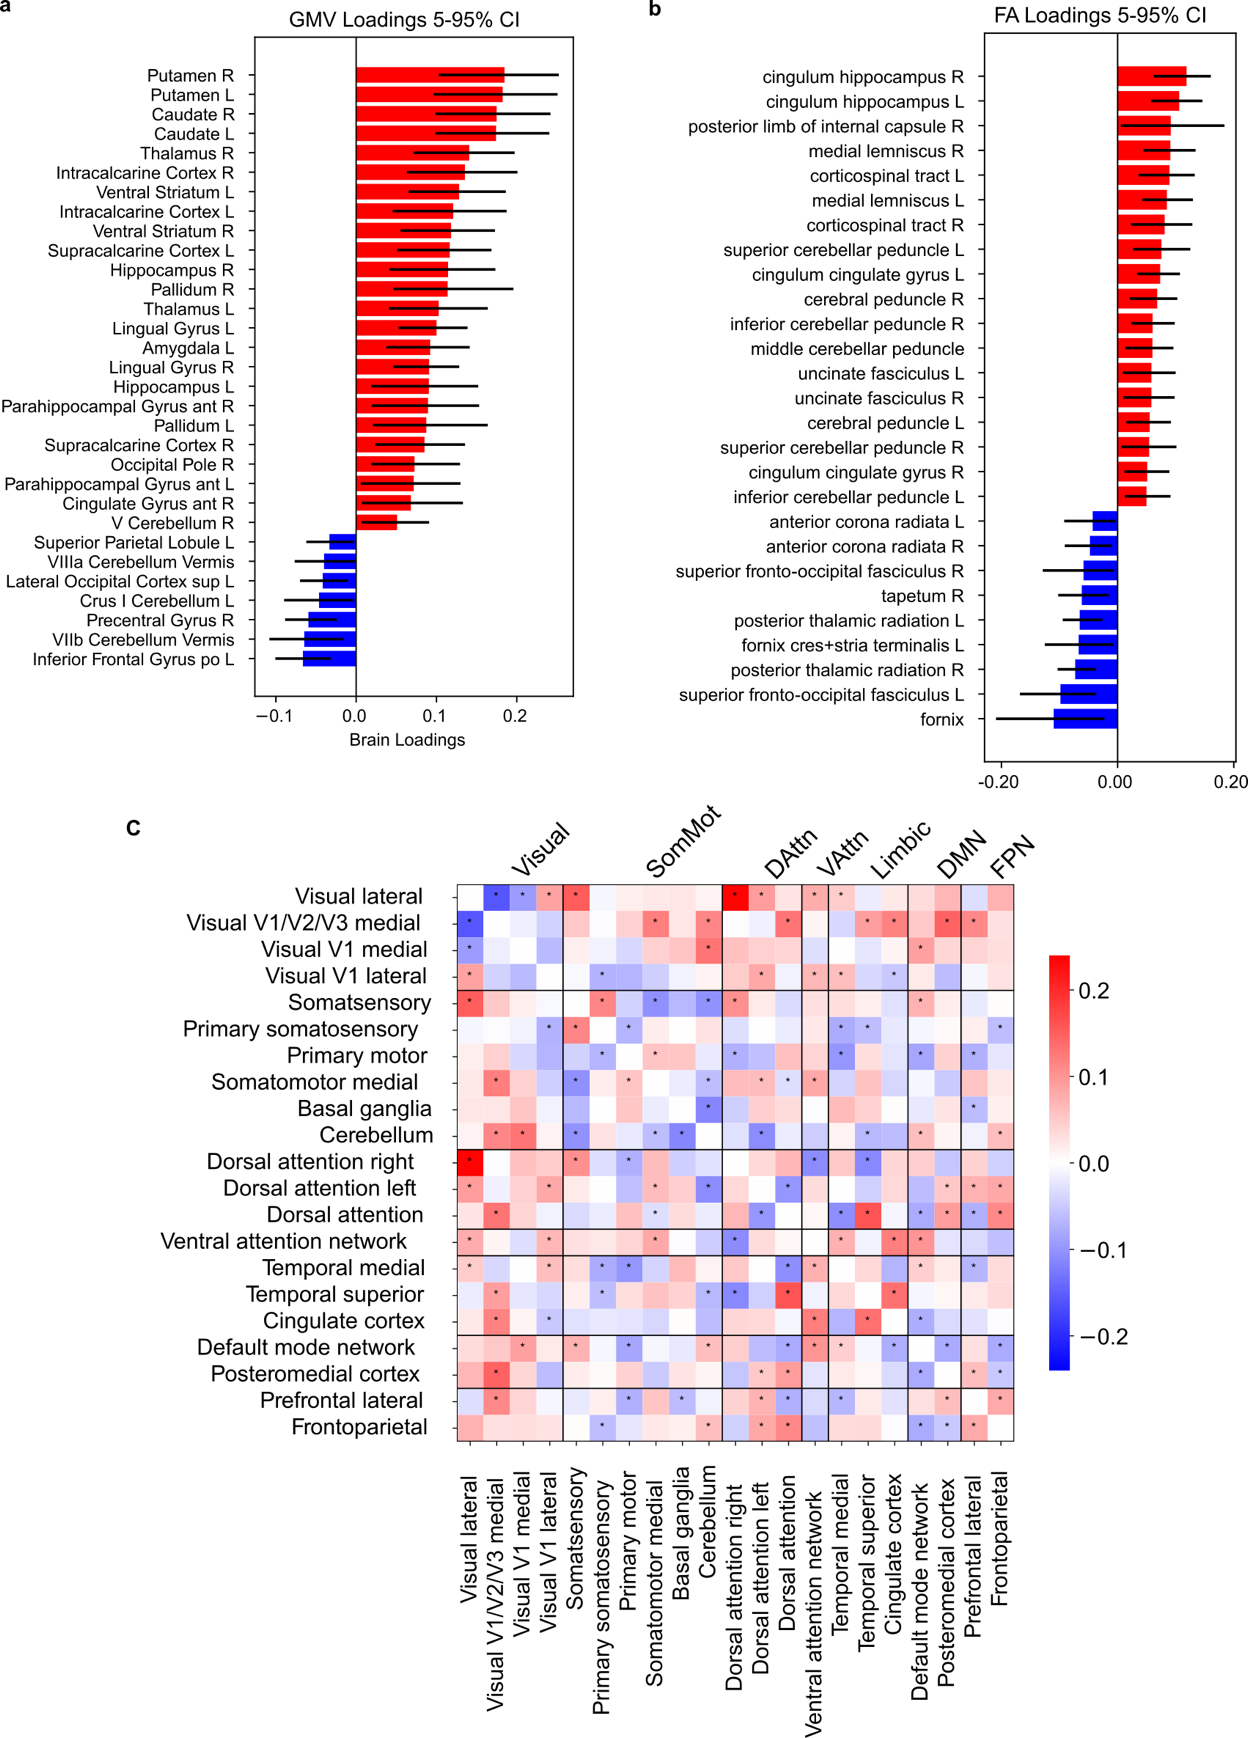


**Supplementary Fig 5**. Significant brain features derived from 1000 bootstrap iterations with 5-95% confidence interval. **a)** the significant GMV loadings. **b)** significant FA loadings. **c)** significant resting-state fMRI loadings was indicated by *.


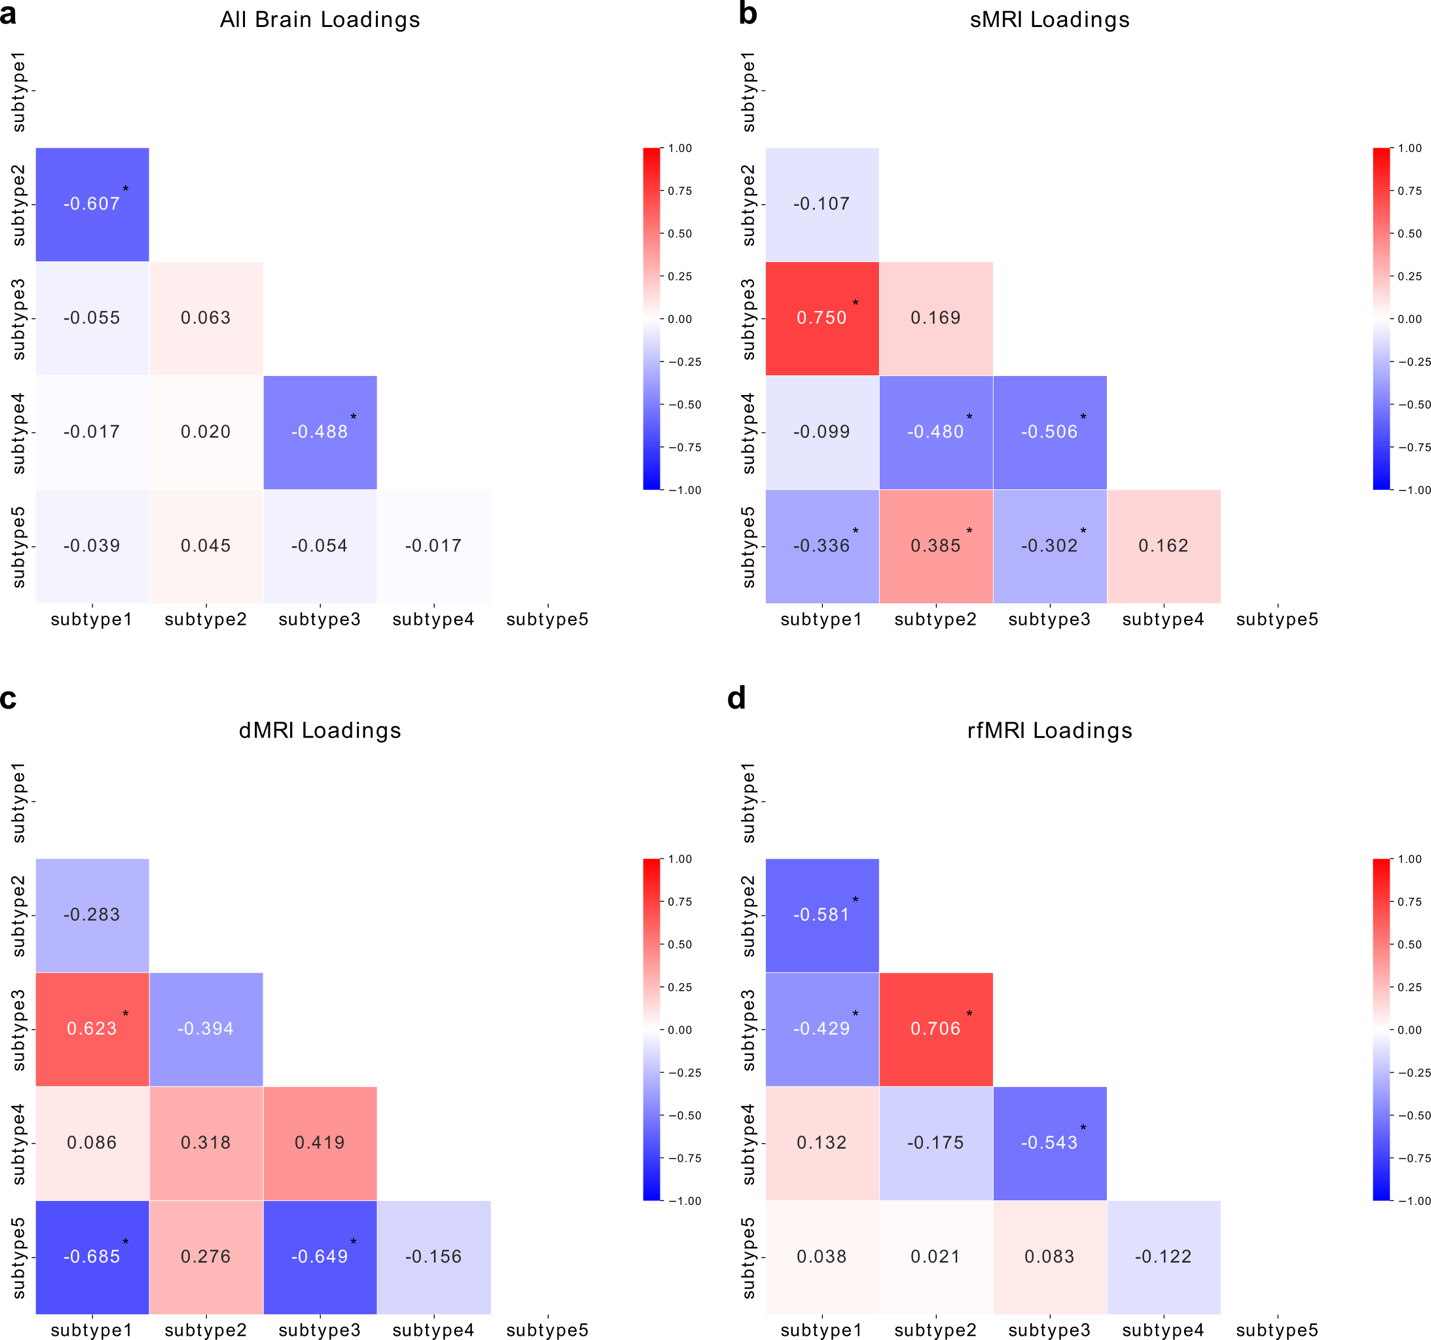


**Supplementary Fig 6**. Similarity among five brain patterns. Pearson correlation coefficients were computed between each pair of loadings and are annotated in each square. **a)** similarity of all brain loadings. **b)** similarity of GMV loadings. **c)** similarity of FA loadings. **d)** similarity of resting-state functional coupling loadings. Significant similarities are indicated by * at threshold P < 0.001.


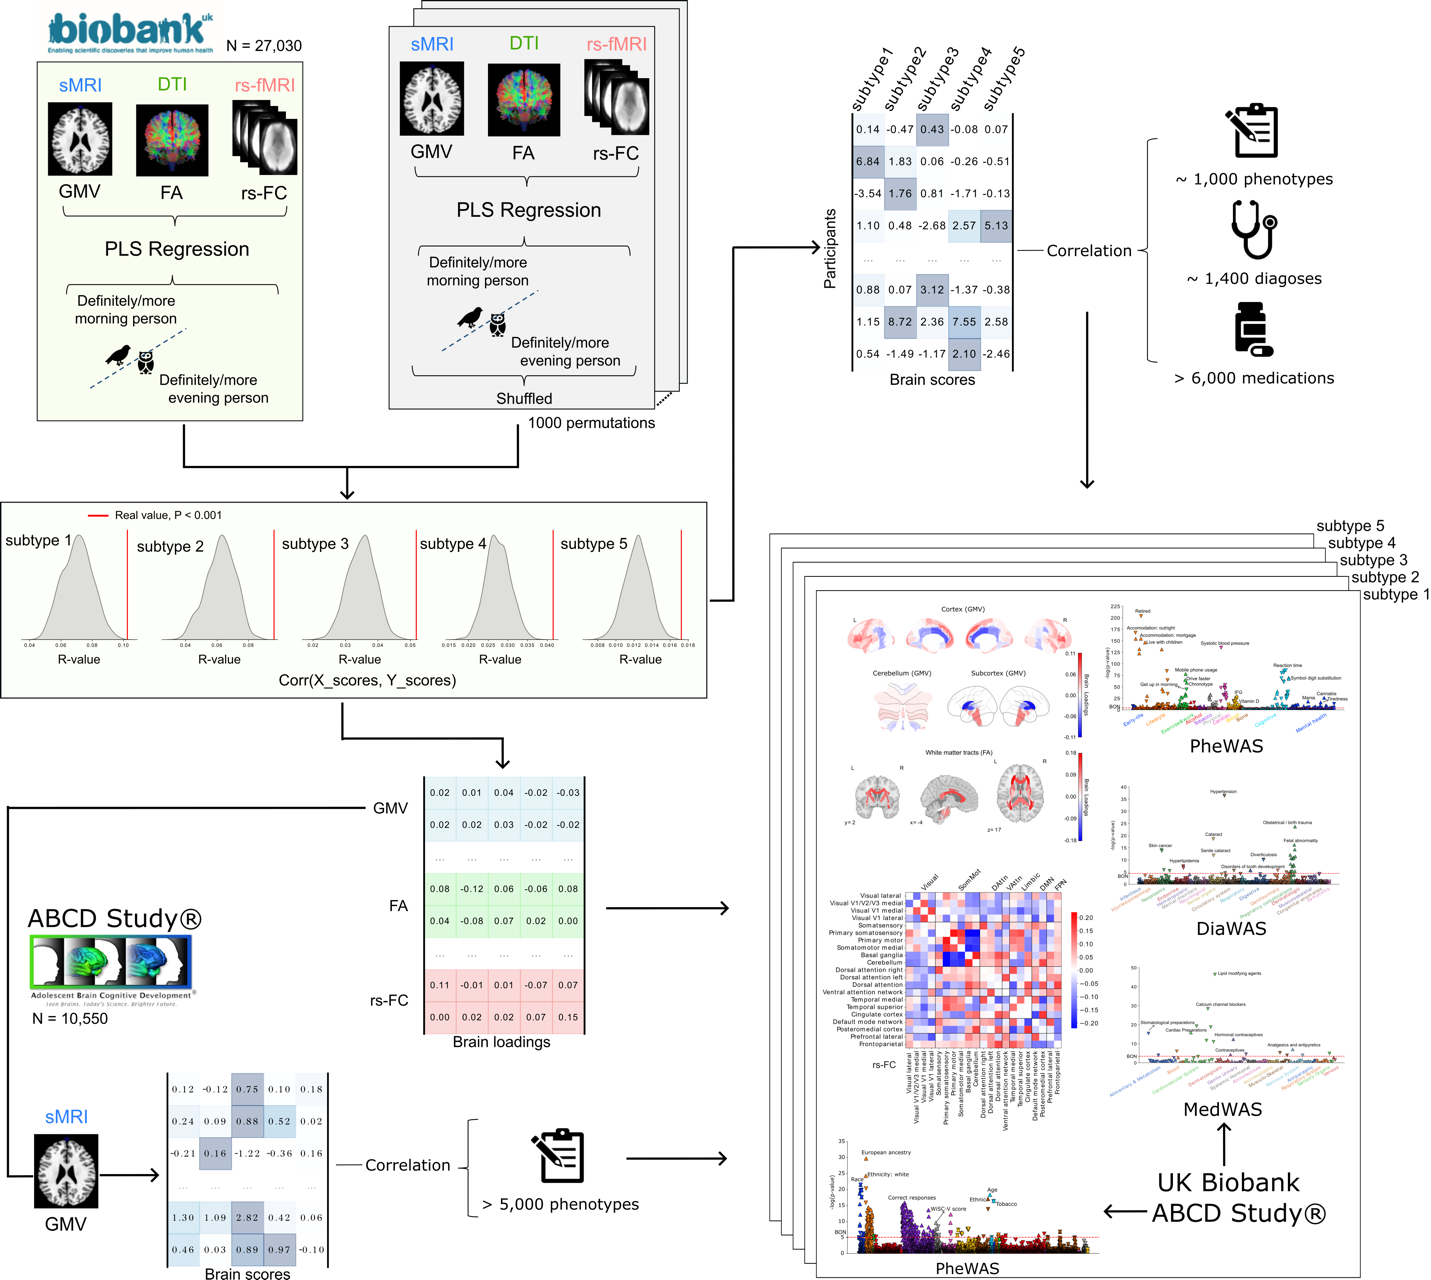


**Supplementary Fig. 7**. The overall workflow of the current study. For our UK Biobank sample, the input variable set was constructed from the concatenated brain features, including 139 regional gray matter volume measures, 48 major white matter microstructure measures, and 210 functional coupling measures between 21 brain components, derived from 27,030 participants. The target variable set consisted of the dichotomized chronotype. The resulting dominant PLS components were evaluated for statistical robustness through a non-parametric permutation procedure. Specifically, in our study, the brain features were held constant while each row of the chronotype variable randomly shuffled, thus mixing group assignment between participants. This procedure generated a valid empirical null distribution of Pearson’s correlation in the derived embedding space of the PLS model. It reflected the null hypothesis of a random association between brain features and chronotype. Pearson's correlation coefficients (rho) estimated between the perturbed low-rank projections were recorded in each iteration. P-values were derived based on the comparison of the original obtained rho and the 1000 rho estimates from the null PLS model, using the threshold P < 0.001. Five significant components (subtypes) were ultimately derived. The brain scores of the 5 subtypes were used to conduct the PheWAS, DiaWAS, and MedWAS by correlating them with other measurements. The derived brain loadings and weights were then applied to transform GMV data from the ABCD Study® cohort into the brain scores for the children (see Methods). A subsequent PheWAS correlated these scores with other phenotypes for the children. In summary, for each subtype, we identified unique brain patterns, three-WAS results for UK Biobank participants, and PheWAS results for ABCD Study® children.

**Supplementary Table 1.** **Demographics and sleep phenotypes of analyzed UK Biobank sample**

|  | Morningness (coded as 0) | Eveningness (coded as 1) |
| --- | --- | --- |
| N | 17995 | 9035 |
| Male | 8128 (45.17%) | 4187 (46.34%) |
| Female | 9867 (54.83%) | 4848 (53.66%) |
| Average Age (years) | 55.71 (SD = 7.27) | 54.71 (SD = 7.56) |
| Average Sleep duration (hours) | 7.29 (SD = 1.01) | 7.22 (SD = 1.03) |
| Nap during day (1-Never, 2-Sometimes, 3-usually) | 1.49 (SD = 0.61) | 1.45 (SD = 0.59) |
| Sleeplessness (1-Never, 2-Sometimes, 3-Usually) | 2.10 (SD = 0.72) | 2.08 (SD = 0.73) |
| Snoring (1-Yes, 2-No) | 1.65 (SD = 0.48) | 1.62 (SD = 0.48) |
| Daytime dozing (0-Never, 1-Sometimes, 2-Often, 3-All the time) | 0.26 (SD = 0.48) | 0.24 (SD = 0.48) |

Summary of sex, average age, and average sleep phenotypes by chronotype categories. The numbers in parentheses for male and female indicate the proportions within each chronotype, while the numbers in parentheses for age and sleep phenotypes represent the standard deviations.

**Supplementary Table 2. Phenotypic associations of the UK Biobank cohort**

| **Subtype 1** | | | | |
| --- | --- | --- | --- | --- |
| **PheWAS** | | | | |
| **cat_id** | **phe_name** | **r_value** | **p_value** | **-logp_value** |
| lifestyle and environment - general | 680_1.0-Own or rent accommodation lived in (0.0) | -0.167 | 2.769E-168 | 167.558 |
| lifestyle and environment - general | 680_2.0-Own or rent accommodation lived in (0.0) | 0.160 | 4.600E-155 | 154.337 |
| lifestyle and environment - general | 680_4.0-Own or rent accommodation lived in (0.0) | 0.027 | 9.535E-06 | 5.021 |
| lifestyle and environment - general | 2395_1.0-Hair/balding pattern (0.0) | 0.025 | 4.240E-05 | 4.373 |
| lifestyle and environment - general | 1797-Father still alive (0.0) | 0.143 | 3.884E-123 | 122.411 |
| lifestyle and environment - general | 1835-Mother still alive (0.0) | 0.148 | 8.891E-133 | 132.051 |
| lifestyle and environment - general | 6138#3-Qualifications (0.0) | 0.033 | 5.087E-08 | 7.294 |
| lifestyle and environment - general | 6138#2-Qualifications (0.0) | 0.026 | 1.945E-05 | 4.711 |
| lifestyle and environment - general | 6142#1-Current employment status (0.0) | 0.160 | 3.169E-155 | 154.499 |
| lifestyle and environment - general | 6142#2-Current employment status (0.0) | -0.184 | 2.498E-204 | 203.602 |
| lifestyle and environment - general | 6142#7-Current employment status (0.0) | 0.030 | 6.104E-07 | 6.214 |
| lifestyle and environment - general | 6139#1-Gas or solid-fuel cooking/heating (0.0) | 0.036 | 3.793E-09 | 8.421 |
| lifestyle and environment - general | 6141#2-How are people in household related to participant (0.0) | 0.156 | 4.183E-147 | 146.379 |
| lifestyle and environment - general | 6145#100-Illness, injury, bereavement, stress in last 2 years (0.0) | -0.055 | 1.929E-19 | 18.715 |
| lifestyle and environment - general | 6145#5-Illness, injury, bereavement, stress in last 2 years (0.0) | 0.030 | 7.375E-07 | 6.132 |
| lifestyle and environment - general | 6145#6-Illness, injury, bereavement, stress in last 2 years (0.0) | 0.070 | 6.403E-31 | 30.194 |
| lifestyle and environment - general | 6145#2-Illness, injury, bereavement, stress in last 2 years (0.0) | 0.033 | 4.696E-08 | 7.328 |
| lifestyle and environment - general | 20107#8-Illnesses of father (0.0) | 0.028 | 4.526E-06 | 5.344 |
| lifestyle and environment - general | 20107#9-Illnesses of father (0.0) | 0.033 | 8.036E-08 | 7.095 |
| lifestyle and environment - general | 20110#100-Illnesses of mother (0.0) | 0.036 | 2.670E-09 | 8.573 |
| lifestyle and environment - general | 20110#2-Illnesses of mother (0.0) | -0.043 | 8.672E-13 | 12.062 |
| lifestyle and environment - general | 20110#10-Illnesses of mother (0.0) | -0.037 | 1.364E-09 | 8.865 |
| lifestyle and environment - general | 20111#100-Illnesses of siblings (0.0) | 0.043 | 2.089E-12 | 11.680 |
| lifestyle and environment - general | 20111#8-Illnesses of siblings (0.0) | -0.040 | 4.375E-11 | 10.359 |
| lifestyle and environment - general | 709-Number in household (0.0) | 0.148 | 4.047E-132 | 131.393 |
| lifestyle and environment - general | 728-Number of vehicles in household (0.0) | 0.046 | 3.983E-14 | 13.400 |
| lifestyle and environment - general | 738-Average total household income before tax (0.0) | 0.086 | 6.360E-46 | 45.197 |
| lifestyle and environment - general | 777-Frequency of travelling from home to job workplace (0.0) | 0.033 | 8.156E-08 | 7.089 |
| lifestyle and environment - general | 1031-Frequency of friend/family visits (0.0) | 0.044 | 8.344E-13 | 12.079 |
| lifestyle and environment - general | 1873-Number of full brothers (0.0) | 0.040 | 4.823E-11 | 10.317 |
| lifestyle and environment - general | 1883-Number of full sisters (0.0) | 0.032 | 1.243E-07 | 6.905 |
| lifestyle and environment - general | 2149-Lifetime number of sexual partners (0.0) | 0.081 | 7.320E-41 | 40.135 |
| lifestyle and environment - general | 2237-Plays computer games (0.0) | 0.045 | 7.461E-14 | 13.127 |
| lifestyle and environment - general | 189-Townsend deprivation index at recruitment (0.0) | 0.045 | 9.031E-14 | 13.044 |
| lifestyle and environment - general | 699-Length of time at current address (0.0) | -0.118 | 4.221E-85 | 84.375 |
| lifestyle and environment - general | 1807-Father's age at death (0.0) | -0.030 | 5.677E-07 | 6.246 |
| lifestyle and environment - general | 1845-Mother's age (0.0) | -0.103 | 4.697E-65 | 64.328 |
| lifestyle and environment - general | 2139-Age first had sexual intercourse (0.0) | -0.076 | 1.453E-35 | 34.838 |
| lifestyle and environment - general | 2946-Father's age (0.0) | -0.045 | 1.842E-13 | 12.735 |
| lifestyle and environment - general | 3526-Mother's age at death (0.0) | -0.044 | 5.588E-13 | 12.253 |
| lifestyle and environment - general | 24003-Nitrogen dioxide air pollution; 2010 (0.0) | 0.033 | 3.612E-08 | 7.442 |
| lifestyle and environment - general | 24004-Nitrogen oxides air pollution; 2010 (0.0) | 0.032 | 1.547E-07 | 6.810 |
| lifestyle and environment - general | 24006-Particulate matter air pollution (pm2.5); 2010 (0.0) | 0.026 | 2.184E-05 | 4.661 |
| lifestyle and environment - general | 24016-Nitrogen dioxide air pollution; 2005 (0.0) | 0.030 | 1.106E-06 | 5.956 |
| lifestyle and environment - general | 24017-Nitrogen dioxide air pollution; 2006 (0.0) | 0.030 | 8.706E-07 | 6.060 |
| lifestyle and environment - general | 24018-Nitrogen dioxide air pollution; 2007 (0.0) | 0.027 | 1.178E-05 | 4.929 |
| lifestyle and environment - general | 24506-Natural environment percentage, buffer 1000m (0.0) | -0.028 | 3.703E-06 | 5.431 |
| lifestyle and environment - general | 24507-Natural environment percentage, buffer 300m (0.0) | -0.031 | 4.851E-07 | 6.314 |
| lifestyle and environment - general | 26410-Index of Multiple Deprivation (England) (0.0) | 0.030 | 6.600E-07 | 6.180 |
| lifestyle and environment - general | 26411-Income score (England) (0.0) | 0.041 | 1.235E-11 | 10.908 |
| lifestyle and environment - general | 26412-Employment score (England) (0.0) | 0.030 | 8.394E-07 | 6.076 |
| lifestyle and environment - general | 26414-Education score (England) (0.0) | 0.029 | 1.541E-06 | 5.812 |
| lifestyle and environment - general | 26416-Crime score (England) (0.0) | 0.026 | 2.395E-05 | 4.621 |
| lifestyle and environment - general | 26417-Living environment score (England) (0.0) | 0.033 | 7.433E-08 | 7.129 |
| lifestyle and environment - exercise and work | 1150_2.0-Usual side of head for mobile phone use (0.0) | 0.029 | 1.252E-06 | 5.902 |
| lifestyle and environment - exercise and work | 1150_3.0-Usual side of head for mobile phone use (0.0) | 0.032 | 1.085E-07 | 6.965 |
| lifestyle and environment - exercise and work | 6162#1-Types of transport used (excluding work) (0.0) | 0.026 | 1.321E-05 | 4.879 |
| lifestyle and environment - exercise and work | 6162#2-Types of transport used (excluding work) (0.0) | -0.036 | 2.499E-09 | 8.602 |
| lifestyle and environment - exercise and work | 6162#4-Types of transport used (excluding work) (0.0) | 0.028 | 2.838E-06 | 5.547 |
| lifestyle and environment - exercise and work | 6162#3-Types of transport used (excluding work) (0.0) | -0.055 | 2.414E-19 | 18.617 |
| lifestyle and environment - exercise and work | 6164#1-Types of physical activity in last 4 weeks (0.0) | -0.042 | 7.934E-12 | 11.101 |
| lifestyle and environment - exercise and work | 6164#2-Types of physical activity in last 4 weeks (0.0) | 0.026 | 1.437E-05 | 4.843 |
| lifestyle and environment - exercise and work | 6164#3-Types of physical activity in last 4 weeks (0.0) | 0.067 | 1.927E-28 | 27.715 |
| lifestyle and environment - exercise and work | 826-Job involves shift work (0.0) | -0.038 | 3.153E-10 | 9.501 |
| lifestyle and environment - exercise and work | 845-Age completed full time education (0.0) | 0.038 | 5.122E-10 | 9.291 |
| lifestyle and environment - exercise and work | 864-Number of days/week walked 10+ minutes (0.0) | -0.064 | 5.991E-26 | 25.223 |
| lifestyle and environment - exercise and work | 884-Number of days/week of moderate physical activity 10+ minutes (0.0) | -0.039 | 1.589E-10 | 9.799 |
| lifestyle and environment - exercise and work | 924-Usual walking pace (0.0) | 0.026 | 2.667E-05 | 4.574 |
| lifestyle and environment - exercise and work | 971-Frequency of walking for pleasure in last 4 weeks (0.0) | -0.040 | 5.749E-11 | 10.240 |
| lifestyle and environment - exercise and work | 981-Duration walking for pleasure (0.0) | -0.032 | 1.003E-07 | 6.998 |
| lifestyle and environment - exercise and work | 1070-Time spent watching television (TV) (0.0) | -0.045 | 1.563E-13 | 12.806 |
| lifestyle and environment - exercise and work | 1080-Time spent using computer (0.0) | 0.026 | 1.377E-05 | 4.861 |
| lifestyle and environment - exercise and work | 1100-Drive faster than motorway speed limit (0.0) | 0.104 | 1.095E-65 | 64.961 |
| lifestyle and environment - exercise and work | 1110-Length of mobile phone use (0.0) | 0.075 | 1.936E-35 | 34.713 |
| lifestyle and environment - exercise and work | 1120-Weekly usage of mobile phone in last 3 months (0.0) | 0.114 | 1.322E-78 | 77.879 |
| lifestyle and environment - exercise and work | 1130-Hands-free device/speakerphone use with mobile phone in last 3 month (0.0) | 0.071 | 1.390E-31 | 30.857 |
| lifestyle and environment - exercise and work | 1140-Difference in mobile phone use compared to two years previously (0.0) | 0.045 | 8.616E-14 | 13.065 |
| lifestyle and environment - exercise and work | 1160-Sleep duration (0.0) | -0.028 | 3.301E-06 | 5.481 |
| lifestyle and environment - exercise and work | 1170-Getting up in morning (0.0) | -0.086 | 2.676E-45 | 44.573 |
| lifestyle and environment - exercise and work | 1180-Morning/evening person (chronotype) (0.0) | 0.099 | 1.040E-59 | 58.983 |
| lifestyle and environment - exercise and work | 1200-Sleeplessness / insomnia (0.0) | -0.040 | 2.850E-11 | 10.545 |
| lifestyle and environment - exercise and work | 2634-Duration of heavy DIY (0.0) | 0.026 | 2.441E-05 | 4.612 |
| lifestyle and environment - exercise and work | 894-Duration of moderate activity (0.0) | -0.026 | 1.757E-05 | 4.755 |
| lifestyle and environment - alcohol | 2664_5.0-Reason for reducing amount of alcohol drunk (0.0) | 0.051 | 3.396E-17 | 16.469 |
| lifestyle and environment - alcohol | 1558-Alcohol intake frequency. (0.0) | -0.050 | 1.003E-16 | 15.999 |
| lifestyle and environment - alcohol | 1588-Average weekly beer plus cider intake (0.0) | 0.035 | 6.210E-09 | 8.207 |
| lifestyle and environment - alcohol | 1628-Alcohol intake versus 10 years previously (0.0) | 0.025 | 3.956E-05 | 4.403 |
| lifestyle and environment - alcohol | 20416-Frequency of consuming six or more units of alcohol (0.0) | 0.029 | 2.298E-06 | 5.639 |
| lifestyle and environment - tobacco | 2877_3.0-Type of tobacco previously smoked (0.0) | -0.025 | 4.564E-05 | 4.341 |
| lifestyle and environment - tobacco | 3446_2.0-Type of tobacco currently smoked (0.0) | 0.027 | 7.872E-06 | 5.104 |
| lifestyle and environment - tobacco | 20116_1.0-Smoking status (0.0) | -0.026 | 1.469E-05 | 4.833 |
| lifestyle and environment - tobacco | 20116_2.0-Smoking status (0.0) | 0.035 | 1.209E-08 | 7.918 |
| lifestyle and environment - tobacco | 1239-Current tobacco smoking (0.0) | 0.035 | 6.258E-09 | 8.204 |
| physical measures - general | 46-Hand grip strength (left) (0.0) | 0.068 | 3.388E-29 | 28.470 |
| physical measures - general | 47-Hand grip strength (right) (0.0) | 0.063 | 6.495E-25 | 24.187 |
| physical measures - general | 3062-Forced vital capacity (FVC) (0.0) | 0.060 | 2.935E-23 | 22.532 |
| physical measures - general | 3063-Forced expiratory volume in 1-second (FEV1) (0.0) | 0.074 | 6.053E-34 | 33.218 |
| physical measures - general | 3064-Peak expiratory flow (PEF) (0.0) | 0.073 | 4.621E-33 | 32.335 |
| physical measures - general | 12143-Weight (pre-imaging) (2.0) | 0.036 | 2.745E-09 | 8.562 |
| physical measures - general | 23099-Body fat percentage (0.0) | -0.042 | 5.435E-12 | 11.265 |
| physical measures - general | 23100-Whole body fat mass (0.0) | -0.034 | 2.126E-08 | 7.672 |
| physical measures - general | 23101-Whole body fat-free mass (0.0) | 0.033 | 5.215E-08 | 7.283 |
| physical measures - general | 23102-Whole body water mass (2.0) | 0.049 | 1.461E-15 | 14.835 |
| physical measures - general | 23111-Leg fat percentage (right) (0.0) | -0.036 | 4.701E-09 | 8.328 |
| physical measures - general | 23113-Leg fat-free mass (right) (0.0) | 0.043 | 2.711E-12 | 11.567 |
| physical measures - general | 23121-Arm fat-free mass (right) (0.0) | 0.027 | 1.104E-05 | 4.957 |
| physical measures - general | 23127-Trunk fat percentage (0.0) | -0.051 | 6.111E-17 | 16.214 |
| physical measures - general | 23128-Trunk fat mass (0.0) | -0.039 | 1.923E-10 | 9.716 |
| physical measures - cardiac & blood vessels | 102-Pulse rate, automated reading (0.0) | -0.055 | 1.435E-19 | 18.843 |
| physical measures - cardiac & blood vessels | 4079-Diastolic blood pressure, automated reading (0.0) | -0.089 | 1.767E-48 | 47.753 |
| physical measures - cardiac & blood vessels | 4080-Systolic blood pressure, automated reading (0.0) | -0.150 | 7.708E-136 | 135.113 |
| physical measures - cardiac & blood vessels | 4196-Pulse wave peak to peak time (0.0) | 0.029 | 2.520E-06 | 5.599 |
| physical measures - cardiac & blood vessels | 6032-Maximum workload during fitness test (0.0) | 0.026 | 2.057E-05 | 4.687 |
| physical measures - cardiac & blood vessels | 12336-Ventricular rate (2.0) | -0.073 | 1.376E-33 | 32.861 |
| physical measures - cardiac & blood vessels | 22670-Minimum carotid IMT (intima-medial thickness) at 120 degrees  (2.0) | -0.072 | 8.675E-33 | 32.062 |
| physical measures - cardiac & blood vessels | 22671-Mean carotid IMT (intima-medial thickness) at 120 degrees  (2.0) | -0.091 | 3.946E-51 | 50.404 |
| physical measures - cardiac & blood vessels | 22672-Maximum carotid IMT (intima-medial thickness) at 120 degrees  (2.0) | -0.088 | 1.279E-47 | 46.893 |
| physical measures - cardiac & blood vessels | 22673-Minimum carotid IMT (intima-medial thickness) at 150 degrees  (2.0) | -0.088 | 4.262E-48 | 47.370 |
| physical measures - cardiac & blood vessels | 22674-Mean carotid IMT (intima-medial thickness) at 150 degrees  (2.0) | -0.095 | 4.332E-55 | 54.363 |
| physical measures - cardiac & blood vessels | 22675-Maximum carotid IMT (intima-medial thickness) at 150 degrees  (2.0) | -0.087 | 9.169E-47 | 46.038 |
| physical measures - cardiac & blood vessels | 22676-Minimum carotid IMT (intima-medial thickness) at 210 degrees  (2.0) | -0.071 | 6.571E-32 | 31.182 |
| physical measures - cardiac & blood vessels | 22677-Mean carotid IMT (intima-medial thickness) at 210 degrees  (2.0) | -0.078 | 1.671E-37 | 36.777 |
| physical measures - cardiac & blood vessels | 22678-Maximum carotid IMT (intima-medial thickness) at 210 degrees  (2.0) | -0.070 | 1.792E-30 | 29.747 |
| physical measures - cardiac & blood vessels | 22679-Minimum carotid IMT (intima-medial thickness) at 240 degrees  (2.0) | -0.061 | 5.265E-24 | 23.279 |
| physical measures - cardiac & blood vessels | 22680-Mean carotid IMT (intima-medial thickness) at 240 degrees  (2.0) | -0.073 | 5.692E-33 | 32.245 |
| physical measures - cardiac & blood vessels | 22681-Maximum carotid IMT (intima-medial thickness) at 240 degrees  (2.0) | -0.065 | 6.494E-27 | 26.188 |
| cognitive phenotypes | 20179_2.0-FI8 : chained arithmetic (0.0) | 0.026 | 1.517E-05 | 4.819 |
| cognitive phenotypes | 20246_3.0-Trail making completion status (0.0) | -0.032 | 1.278E-07 | 6.894 |
| cognitive phenotypes | 6332#5-Item selected for each puzzle (2.0) | 0.029 | 2.492E-06 | 5.604 |
| cognitive phenotypes | 6332#0-Item selected for each puzzle (2.0) | 0.025 | 3.530E-05 | 4.452 |
| cognitive phenotypes | 398-Number of correct matches in round (2.1) | 0.065 | 1.549E-26 | 25.810 |
| cognitive phenotypes | 6351-Total errors traversing alphanumeric path (trail #2) (2.0) | -0.040 | 3.462E-11 | 10.461 |
| cognitive phenotypes | 6373-Number of puzzles correctly solved (2.0) | 0.076 | 1.130E-35 | 34.947 |
| cognitive phenotypes | 6374-Number of puzzles viewed (2.0) | 0.031 | 4.545E-07 | 6.342 |
| cognitive phenotypes | 6382-n/a (2.0) | 0.081 | 1.303E-40 | 39.885 |
| cognitive phenotypes | 6383-Number of puzzles attempted (2.0) | 0.045 | 7.525E-14 | 13.124 |
| cognitive phenotypes | 399-Number of incorrect matches in round (0.1) | -0.063 | 3.162E-25 | 24.500 |
| cognitive phenotypes | 400-Time to complete round (0.1) | -0.107 | 1.622E-69 | 68.790 |
| cognitive phenotypes | 404-Duration to first press of snap-button in each round (0.0) | -0.116 | 6.120E-81 | 80.213 |
| cognitive phenotypes | 4253-Time number displayed for (2.0) | 0.047 | 9.829E-15 | 14.007 |
| cognitive phenotypes | 4290-Duration screen displayed (0.0) | -0.031 | 2.910E-07 | 6.536 |
| cognitive phenotypes | 6333-Duration spent answering each puzzle (2.0) | -0.026 | 1.973E-05 | 4.705 |
| cognitive phenotypes | 6348-Duration to complete numeric path (trail #1) (2.0) | -0.101 | 1.730E-62 | 61.762 |
| cognitive phenotypes | 6350-Duration to complete alphanumeric path (trail #2) (2.0) | -0.116 | 1.550E-81 | 80.810 |
| cognitive phenotypes | 6772-Interval between previous point and current one in numeric path (trail #1) (2.0) | -0.100 | 1.854E-61 | 60.732 |
| cognitive phenotypes | 6773-Interval between previous point and current one in alphanumeric path (trail #2) (2.0) | -0.119 | 7.800E-86 | 85.108 |
| cognitive phenotypes | 20023-Mean time to correctly identify matches (0.0) | -0.120 | 1.041E-86 | 85.983 |
| cognitive phenotypes | 20132-Number of incorrect matches in round (0.0) | -0.033 | 5.586E-08 | 7.253 |
| cognitive phenotypes | 20133-Time to complete round (0.0) | -0.069 | 6.702E-30 | 29.174 |
| cognitive phenotypes | 20149-Interval between previous point and current one in numeric path (trail #1) (0.1) | -0.062 | 8.665E-25 | 24.062 |
| cognitive phenotypes | 20153-Forced expiratory volume in 1-second (FEV1), predicted (0.0) | 0.033 | 4.438E-08 | 7.353 |
| cognitive phenotypes | 20155-Interval between previous point and current one in alphanumeric path (trail #2) (0.1) | -0.072 | 2.821E-32 | 31.550 |
| cognitive phenotypes | 20156-Duration to complete numeric path (trail #1) (0.0) | -0.067 | 1.231E-28 | 27.910 |
| cognitive phenotypes | 20157-Duration to complete alphanumeric path (trail #2) (0.0) | -0.080 | 2.070E-39 | 38.684 |
| cognitive phenotypes | 20159-Number of symbol digit matches made correctly (0.0) | 0.078 | 7.026E-38 | 37.153 |
| cognitive phenotypes | 20195-Number of symbol digit matches attempted (0.0) | 0.077 | 3.055E-37 | 36.515 |
| cognitive phenotypes | 20230-Duration to entering value (0.0) | -0.081 | 2.419E-40 | 39.616 |
| cognitive phenotypes | 23323-Number of symbol digit matches attempted (2.0) | 0.107 | 3.565E-70 | 69.448 |
| cognitive phenotypes | 23324-Number of symbol digit matches made correctly (2.0) | 0.106 | 5.422E-68 | 67.266 |
| mental health self-report | 20526_1.0-Been in serious accident believed to be life-threatening (0.0) | 0.025 | 4.610E-05 | 4.336 |
| mental health self-report | 20529_0.0-Victim of physically violent crime (0.0) | -0.032 | 1.581E-07 | 6.801 |
| mental health self-report | 20529_1.0-Victim of physically violent crime (0.0) | 0.038 | 4.905E-10 | 9.309 |
| mental health self-report | 20531_0.0-Victim of sexual assault (0.0) | -0.026 | 1.548E-05 | 4.810 |
| mental health self-report | 20531_1.0-Victim of sexual assault (0.0) | 0.035 | 1.160E-08 | 7.935 |
| mental health self-report | 20536_1.0-Weight change during worst episode of depression (0.0) | 0.038 | 2.956E-10 | 9.529 |
| mental health self-report | 1960-Fed-up feelings (0.0) | 0.031 | 2.262E-07 | 6.645 |
| mental health self-report | 1970-Nervous feelings (0.0) | -0.035 | 8.281E-09 | 8.082 |
| mental health self-report | 1980-Worrier / anxious feelings (0.0) | -0.039 | 2.012E-10 | 9.696 |
| mental health self-report | 2040-Risk taking (0.0) | 0.043 | 1.435E-12 | 11.843 |
| mental health self-report | 20441-Ever had prolonged loss of interest in normal activities (0.0) | 0.036 | 5.007E-09 | 8.300 |
| mental health self-report | 20480-Ever self-harmed (0.0) | 0.028 | 3.427E-06 | 5.465 |
| mental health self-report | 20499-Ever sought or received professional help for mental distress (0.0) | 0.026 | 2.622E-05 | 4.581 |
| mental health self-report | 20500-Ever suffered mental distress preventing usual activities (0.0) | 0.027 | 6.365E-06 | 5.196 |
| mental health self-report | 20502-Ever had period extreme irritability (0.0) | 0.054 | 8.135E-19 | 18.090 |
| mental health self-report | 20535-Waking too early (0.0) | -0.028 | 2.911E-06 | 5.536 |
| mental health self-report | 20547#1-Activities undertaken to treat depression (0.1) | 0.029 | 2.151E-06 | 5.667 |
| mental health self-report | 20548#7-Manifestations of mania or irritability (0.1) | 0.029 | 1.602E-06 | 5.795 |
| mental health self-report | 20548#8-Manifestations of mania or irritability (0.1) | 0.033 | 5.484E-08 | 7.261 |
| mental health self-report | 20548#6-Manifestations of mania or irritability (0.1) | 0.030 | 9.580E-07 | 6.019 |
| mental health self-report | 20553#4-Methods of self-harm used (0.1) | 0.026 | 2.317E-05 | 4.635 |
| mental health self-report | 20553#5-Methods of self-harm used (0.1) | 0.027 | 1.018E-05 | 4.992 |
| mental health self-report | 2050-Frequency of depressed mood in last 2 weeks (0.0) | 0.035 | 1.040E-08 | 7.983 |
| mental health self-report | 2060-Frequency of unenthusiasm / disinterest in last 2 weeks (0.0) | 0.038 | 3.185E-10 | 9.497 |
| mental health self-report | 2070-Frequency of tenseness / restlessness in last 2 weeks (0.0) | 0.027 | 6.139E-06 | 5.212 |
| mental health self-report | 2080-Frequency of tiredness / lethargy in last 2 weeks (0.0) | 0.051 | 7.434E-17 | 16.129 |
| mental health self-report | 4581-Financial situation satisfaction (0.0) | 0.028 | 3.460E-06 | 5.461 |
| mental health self-report | 20453-Ever taken cannabis (0.0) | 0.065 | 6.729E-27 | 26.172 |
| mental health self-report | 20479-Ever thought that life not worth living (0.0) | 0.034 | 2.862E-08 | 7.543 |
| mental health self-report | 20485-Ever contemplated self-harm (0.0) | 0.039 | 1.756E-10 | 9.756 |
| mental health self-report | 20488-Physically abused by family as a child (0.0) | 0.033 | 4.716E-08 | 7.326 |
| mental health self-report | 20491-Someone to take to doctor when needed as a child (0.0) | 0.033 | 6.674E-08 | 7.176 |
| mental health self-report | 20511-Recent poor appetite or overeating (0.0) | 0.027 | 7.695E-06 | 5.114 |
| mental health self-report | 20519-Recent feelings of tiredness or low energy (0.0) | 0.028 | 5.819E-06 | 5.235 |
| mental health self-report | 20521-Belittlement by partner or ex-partner as an adult (0.0) | 0.026 | 1.754E-05 | 4.756 |
| mental health self-report | 20433-Age at first episode of depression (0.0) | -0.027 | 9.281E-06 | 5.032 |
| mental health self-report | 20434-Age at last episode of depression (0.0) | -0.045 | 8.468E-14 | 13.072 |
| early life factors | 1677-Breastfed as a baby (0.0) | -0.036 | 3.828E-09 | 8.417 |
| early life factors | 1687-Comparative body size at age 10 (0.0) | -0.033 | 8.081E-08 | 7.093 |
| early life factors | 20022-Birth weight (0.0) | -0.030 | 7.283E-07 | 6.138 |
| physical measures - bone density and sizes | 78-Heel bone mineral density (BMD) T-score, automated (0.0) | 0.032 | 1.470E-07 | 6.833 |
| physical measures - bone density and sizes | 3144-Heel Broadband ultrasound attenuation, direct entry (0.0) | 0.033 | 8.539E-08 | 7.069 |
| physical measures - bone density and sizes | 4101-Heel broadband ultrasound attenuation (left) (0.0) | 0.027 | 6.562E-06 | 5.183 |
| physical measures - bone density and sizes | 4120-Heel broadband ultrasound attenuation (right) (0.0) | 0.025 | 3.792E-05 | 4.421 |
| physical measures - bone density and sizes | 4123-Heel quantitative ultrasound index (QUI), direct entry (right) (0.0) | 0.030 | 7.996E-07 | 6.097 |
| blood assays | 30040-Mean corpuscular volume (0.0) | -0.043 | 2.083E-12 | 11.681 |
| blood assays | 30050-Mean corpuscular haemoglobin (0.0) | -0.033 | 6.703E-08 | 7.174 |
| blood assays | 30100-Mean platelet (thrombocyte) volume (0.0) | 0.035 | 5.709E-09 | 8.243 |
| blood assays | 30270-Mean sphered cell volume (0.0) | -0.035 | 6.290E-09 | 8.201 |
| blood assays | 30610-Alkaline phosphatase (0.0) | -0.056 | 2.525E-20 | 19.598 |
| blood assays | 30630-Apolipoprotein A (0.0) | -0.055 | 1.521E-19 | 18.818 |
| blood assays | 30640-Apolipoprotein B (0.0) | -0.025 | 4.788E-05 | 4.320 |
| blood assays | 30650-Aspartate aminotransferase (0.0) | -0.029 | 2.337E-06 | 5.631 |
| blood assays | 30670-Urea (0.0) | -0.052 | 6.770E-18 | 17.169 |
| blood assays | 30680-Calcium (0.0) | -0.032 | 1.845E-07 | 6.734 |
| blood assays | 30690-Cholesterol (0.0) | -0.041 | 1.235E-11 | 10.908 |
| blood assays | 30720-Cystatin C (0.0) | -0.063 | 5.692E-25 | 24.245 |
| blood assays | 30730-Gamma glutamyltransferase (0.0) | -0.026 | 2.744E-05 | 4.562 |
| blood assays | 30740-Glucose (0.0) | -0.059 | 4.306E-22 | 21.366 |
| blood assays | 30750-Glycated haemoglobin (HbA1c) (0.0) | -0.066 | 2.790E-27 | 26.554 |
| blood assays | 30760-HDL cholesterol (0.0) | -0.047 | 8.444E-15 | 14.073 |
| blood assays | 30770-IGF-1 (0.0) | 0.070 | 1.138E-30 | 29.944 |
| blood assays | 30780-LDL direct (0.0) | -0.026 | 1.396E-05 | 4.855 |
| blood assays | 30830-SHBG (0.0) | -0.030 | 1.200E-06 | 5.921 |
| blood assays | 30890-Vitamin D (0.0) | -0.039 | 1.009E-10 | 9.996 |
| **DiaWAS** | | | | |
| **cat_id** | **phe_name** | **r_value** | **p_value** | **-logp_value** |
| neoplasms | Skin cancer | -0.047 | 7.943E-15 | 14.100 |
| neoplasms | Other non-epithelial cancer of skin | -0.046 | 2.169E-14 | 13.664 |
| neoplasms | Cancer of prostate | -0.029 | 1.291E-06 | 5.889 |
| neoplasms | Benign neoplasm of colon | -0.028 | 3.034E-06 | 5.518 |
| endocrine/metabolic | Disorders of lipoid metabolism | -0.033 | 4.819E-08 | 7.317 |
| endocrine/metabolic | Hyperlipidemia | -0.033 | 3.641E-08 | 7.439 |
| endocrine/metabolic | Hypercholesterolemia | -0.032 | 2.058E-07 | 6.686 |
| sense organs | Cataract | -0.055 | 2.501E-19 | 18.602 |
| sense organs | Senile cataract | -0.043 | 1.433E-12 | 11.844 |
| circulatory system | Hypertension | -0.077 | 3.832E-37 | 36.417 |
| circulatory system | Essential hypertension | -0.077 | 3.677E-37 | 36.435 |
| circulatory system | Ischemic Heart Disease | -0.026 | 2.364E-05 | 4.626 |
| circulatory system | Cerebrovascular disease | -0.029 | 2.579E-06 | 5.589 |
| digestive | Disorders of tooth development | 0.029 | 1.678E-06 | 5.775 |
| digestive | Disturbances in tooth eruption | 0.029 | 2.327E-06 | 5.633 |
| digestive | Diverticulosis and diverticulitis | -0.040 | 7.040E-11 | 10.152 |
| digestive | Diverticulosis | -0.039 | 1.027E-10 | 9.988 |
| genitourinary | Hyperplasia of prostate | -0.029 | 1.897E-06 | 5.722 |
| genitourinary | Polyp of female genital organs | -0.027 | 1.156E-05 | 4.937 |
| genitourinary | Polyp of corpus uteri | -0.026 | 1.577E-05 | 4.802 |
| pregnancy complications | Miscarriage; stillbirth | 0.043 | 8.556E-13 | 12.068 |
| pregnancy complications | Missed abortion/Hydatidiform mole | 0.027 | 6.192E-06 | 5.208 |
| pregnancy complications | Hemorrhage during pregnancy; childbirth and postpartum | 0.036 | 5.129E-09 | 8.290 |
| pregnancy complications | Antepartum hemorrhage, abruptio placentae, and placenta previa | 0.027 | 7.042E-06 | 5.152 |
| pregnancy complications | Early or threatened labor; hemorrhage in early pregnancy | 0.041 | 2.049E-11 | 10.688 |
| pregnancy complications | Hemorrhage in early pregnancy | 0.028 | 3.652E-06 | 5.437 |
| pregnancy complications | Anemia during pregnancy | 0.033 | 4.755E-08 | 7.323 |
| pregnancy complications | Late pregnancy and failed induction | 0.028 | 4.198E-06 | 5.377 |
| pregnancy complications | Other complications of pregnancy NEC | 0.040 | 3.123E-11 | 10.505 |
| pregnancy complications | Normal delivery | 0.041 | 1.131E-11 | 10.947 |
| pregnancy complications | Malposition and malpresentation of fetus or obstruction | 0.035 | 1.057E-08 | 7.976 |
| pregnancy complications | Problems associated with amniotic cavity and membranes | 0.041 | 1.723E-11 | 10.764 |
| pregnancy complications | Abnormality of organs and soft tissues of pelvis complicating pregnancy, childbirth, or the puerperium | 0.034 | 2.636E-08 | 7.579 |
| pregnancy complications | Known or suspected fetal abnormality affecting management of mother | 0.051 | 6.338E-17 | 16.198 |
| pregnancy complications | Fetal distress and abnormal forces of labor | 0.047 | 5.603E-15 | 14.252 |
| pregnancy complications | Umbilical cord complications during labor and delivery | 0.028 | 4.024E-06 | 5.395 |
| pregnancy complications | Obstetrical/birth trauma | 0.062 | 2.019E-24 | 23.695 |
| pregnancy complications | Complications of labor and delivery NEC | 0.042 | 3.659E-12 | 11.437 |
| **MedWAS** | | | | |
| **cat_id** | **phe_name** | **r_value** | **p_value** | **-logp_value** |
| Alimentary Tract and Metabolism | A01A_Stomatological Preparations | -0.049 | 4.274E-16 | 15.369 |
| Alimentary Tract and Metabolism | A06A_Drugs for Constipation | -0.023 | 1.144E-04 | 3.942 |
| Blood and Blood Forming Organs | B01A_Antithrombotic Agents | -0.030 | 9.573E-07 | 6.019 |
| Cardiovascular System | C01E_Other Cardiac Preparations | 0.050 | 1.375E-16 | 15.862 |
| Cardiovascular System | C03A_Low-Ceiling Diuretics, Thiazides | -0.056 | 5.662E-20 | 19.247 |
| Cardiovascular System | C07A_Beta Blocking Agents | -0.043 | 2.271E-12 | 11.644 |
| Cardiovascular System | C08C_Selective Calcium Channel Blockers with mainly Vascular Effects | -0.068 | 4.362E-29 | 28.360 |
| Cardiovascular System | C09A_Ace Inhibitors, Plain | -0.055 | 1.831E-19 | 18.737 |
| Cardiovascular System | C09C_Angiotensin Ii Receptor Blockers (Arbs), Plain | -0.041 | 1.024E-11 | 10.990 |
| Cardiovascular System | C10A_Lipid Modifying Agents, Plain | -0.088 | 4.017E-47 | 46.396 |
| Genito Urinary System and Sex Hormones | G02B_Contraceptives for Topical Use | 0.025 | 5.242E-05 | 4.280 |
| Genito Urinary System and Sex Hormones | G03A_Hormonal Contraceptives for Systemic Use | 0.044 | 4.488E-13 | 12.348 |
| Genito Urinary System and Sex Hormones | G04C_Drugs Used in Benign Prostatic Hypertrophy | -0.025 | 3.093E-05 | 4.510 |
| Musculo-Skeletal System | M01A_Antiinflammatory and Antirheumatic Products, Non-Steroids | -0.028 | 5.403E-06 | 5.267 |
| Musculo-Skeletal System | M05B_Drugs Affecting Bone Structure and Mineralization | -0.023 | 1.258E-04 | 3.900 |
| Nervous System | N02B_Other Analgesics and Antipyretics | 0.032 | 9.275E-08 | 7.033 |
| Nervous System | N05C_Hypnotics and Sedatives | -0.023 | 1.267E-04 | 3.897 |
| Sensory Organs | S01E_Antiglaucoma Preparations and Miotics | -0.026 | 1.333E-05 | 4.875 |
| **Subtype 2** | | | | |
| **PheWAS** | | | | |
| **cat_id** | **phe_name** | **r_value** | **p_value** | **-logp_value** |
| lifestyle and environment - general | 680_2.0-Own or rent accommodation lived in (0.0) | -0.026 | 2.002E-05 | 4.699 |
| lifestyle and environment - general | 6142#1-Current employment status (0.0) | -0.036 | 3.129E-09 | 8.505 |
| lifestyle and environment - general | 6142#2-Current employment status (0.0) | 0.035 | 1.264E-08 | 7.898 |
| lifestyle and environment - general | 6141#2-How are people in household related to participant (0.0) | -0.036 | 2.054E-09 | 8.687 |
| lifestyle and environment - general | 6160#1-Leisure/social activities (0.0) | -0.044 | 7.314E-13 | 12.136 |
| lifestyle and environment - general | 709-Number in household (0.0) | -0.043 | 1.187E-12 | 11.925 |
| lifestyle and environment - general | 728-Number of vehicles in household (0.0) | -0.051 | 8.217E-17 | 16.085 |
| lifestyle and environment - general | 738-Average total household income before tax (0.0) | -0.052 | 1.620E-17 | 16.790 |
| lifestyle and environment - general | 2237-Plays computer games (0.0) | 0.039 | 2.044E-10 | 9.689 |
| lifestyle and environment - general | 3-Verbal interview duration (0.0) | 0.037 | 8.149E-10 | 9.089 |
| lifestyle and environment - general | 2139-Age first had sexual intercourse (0.0) | 0.031 | 4.241E-07 | 6.372 |
| lifestyle and environment - exercise and work | 1150_2.0-Usual side of head for mobile phone use (0.0) | -0.026 | 1.430E-05 | 4.845 |
| lifestyle and environment - exercise and work | 6164#2-Types of physical activity in last 4 weeks (0.0) | -0.035 | 1.174E-08 | 7.930 |
| lifestyle and environment - exercise and work | 6164#3-Types of physical activity in last 4 weeks (0.0) | -0.039 | 1.213E-10 | 9.916 |
| lifestyle and environment - exercise and work | 864-Number of days/week walked 10+ minutes (0.0) | -0.032 | 1.334E-07 | 6.875 |
| lifestyle and environment - exercise and work | 904-Number of days/week of vigorous physical activity 10+ minutes (0.0) | -0.052 | 1.615E-17 | 16.792 |
| lifestyle and environment - exercise and work | 1110-Length of mobile phone use (0.0) | -0.034 | 3.176E-08 | 7.498 |
| lifestyle and environment - exercise and work | 1120-Weekly usage of mobile phone in last 3 months (0.0) | -0.046 | 6.166E-14 | 13.210 |
| lifestyle and environment - exercise and work | 1170-Getting up in morning (0.0) | -0.061 | 1.005E-23 | 22.998 |
| lifestyle and environment - exercise and work | 1180-Morning/evening person (chronotype) (0.0) | 0.095 | 5.433E-55 | 54.265 |
| lifestyle and environment - exercise and work | 1220-Daytime dozing / sleeping (narcolepsy) (0.0) | -0.027 | 1.249E-05 | 4.904 |
| lifestyle and environment - alcohol | 1578-Average weekly champagne plus white wine intake (0.0) | -0.026 | 2.036E-05 | 4.691 |
| lifestyle and environment - tobacco | 3446_1.0-Type of tobacco currently smoked (0.0) | 0.036 | 2.102E-09 | 8.677 |
| lifestyle and environment - tobacco | 20116_2.0-Smoking status (0.0) | 0.037 | 1.745E-09 | 8.758 |
| lifestyle and environment - tobacco | 22506_3.0-Tobacco smoking (0.0) | 0.026 | 1.671E-05 | 4.777 |
| lifestyle and environment - tobacco | 1239-Current tobacco smoking (0.0) | 0.025 | 3.153E-05 | 4.501 |
| lifestyle and environment - tobacco | 20161-Pack years of smoking (0.0) | 0.027 | 9.027E-06 | 5.044 |
| physical measures - general | 1707_1.0-Handedness (chirality/laterality) (0.0) | 0.032 | 1.754E-07 | 6.756 |
| physical measures - general | 1707_2.0-Handedness (chirality/laterality) (0.0) | -0.036 | 4.466E-09 | 8.350 |
| physical measures - cardiac & blood vessels | 102-Pulse rate, automated reading (0.0) | 0.046 | 5.441E-14 | 13.264 |
| physical measures - cardiac & blood vessels | 4079-Diastolic blood pressure, automated reading (0.0) | 0.070 | 5.391E-31 | 30.268 |
| physical measures - cardiac & blood vessels | 4080-Systolic blood pressure, automated reading (0.0) | 0.086 | 4.591E-45 | 44.338 |
| physical measures - cardiac & blood vessels | 12336-Ventricular rate (2.0) | 0.065 | 2.383E-26 | 25.623 |
| cognitive phenotypes | 630-Touchscreen duration (0.0) | 0.042 | 8.665E-12 | 11.062 |
| cognitive phenotypes | 6333-Duration spent answering each puzzle (2.0) | 0.030 | 6.002E-07 | 6.222 |
| cognitive phenotypes | 20023-Mean time to correctly identify matches (0.0) | 0.027 | 9.760E-06 | 5.011 |
| cognitive phenotypes | 20195-Number of symbol digit matches attempted (0.0) | -0.031 | 2.648E-07 | 6.577 |
| cognitive phenotypes | 23323-Number of symbol digit matches attempted (2.0) | -0.042 | 7.495E-12 | 11.125 |
| cognitive phenotypes | 23324-Number of symbol digit matches made correctly (2.0) | -0.032 | 1.561E-07 | 6.807 |
| mental health self-report | 2090-Seen doctor (GP) for nerves, anxiety, tension or depression (0.0) | 0.038 | 3.431E-10 | 9.465 |
| mental health self-report | 20544#11-Mental health problems ever diagnosed by a professional (0.1) | 0.027 | 1.238E-05 | 4.907 |
| mental health self-report | 20549#3-Substances taken for anxiety (0.1) | 0.028 | 6.054E-06 | 5.218 |
| mental health self-report | 20458-General happiness (0.0) | 0.031 | 3.570E-07 | 6.447 |
| mental health self-report | 20459-General happiness with own health (0.0) | 0.042 | 4.777E-12 | 11.321 |
| mental health self-report | 20460-Belief that own life is meaningful (0.0) | -0.036 | 3.519E-09 | 8.454 |
| mental health self-report | 20489-Felt loved as a child (0.0) | -0.027 | 8.384E-06 | 5.077 |
| blood assays | 30710-C-reactive protein (0.0) | 0.026 | 2.563E-05 | 4.591 |
| blood assays | 30740-Glucose (0.0) | 0.029 | 1.726E-06 | 5.763 |
| blood assays | 30810-Phosphate (0.0) | -0.031 | 4.593E-07 | 6.338 |
| blood assays | 30890-Vitamin D (0.0) | -0.032 | 2.150E-07 | 6.667 |
| **DiaWAS** | | | | |
| **cat_id** | **phe_name** | **r_value** | **p_value** | **-logp_value** |
| endocrine/metabolic | Diabetes mellitus | 0.028 | 4.010E-06 | 5.397 |
| endocrine/metabolic | Type 2 diabetes | 0.028 | 2.904E-06 | 5.537 |
| endocrine/metabolic | Protein-calorie malnutrition | 0.029 | 2.629E-06 | 5.580 |
| neurological | Multiple sclerosis | 0.026 | 2.054E-05 | 4.687 |
| circulatory system | Hypertension | 0.074 | 8.091E-34 | 33.092 |
| circulatory system | Essential hypertension | 0.074 | 8.830E-34 | 33.054 |
| circulatory system | Cardiac dysrhythmias | 0.027 | 8.975E-06 | 5.047 |
| circulatory system | Cerebrovascular disease | 0.030 | 8.946E-07 | 6.048 |
| circulatory system | Occlusion of cerebral arteries | 0.027 | 8.849E-06 | 5.053 |
| respiratory | Pneumonia due to fungus (mycoses) | 0.027 | 8.002E-06 | 5.097 |
| respiratory | Chronic airway obstruction | 0.031 | 4.107E-07 | 6.386 |
| respiratory | Chronic bronchitis | 0.031 | 2.624E-07 | 6.581 |
| respiratory | Obstructive chronic bronchitis | 0.032 | 1.360E-07 | 6.866 |
| **MedWAS** | | | | |
| **cat_id** | **phe_name** | **r_value** | **p_value** | **-logp_value** |
| Alimentary Tract and Metabolism | A01A_Stomatological Preparations | 0.030 | 9.473E-07 | 6.024 |
| Alimentary Tract and Metabolism | A02B_Drugs for Peptic Ulcer and Gastro-Oesophageal Reflux Disease (Gord) | 0.030 | 1.224E-06 | 5.912 |
| Alimentary Tract and Metabolism | A07E_Intestinal Antiinflammatory Agents | 0.022 | 2.358E-04 | 3.627 |
| Alimentary Tract and Metabolism | A10B_Blood Glucose Lowering Drugs, Excl. Insulins | 0.024 | 7.035E-05 | 4.153 |
| Blood and Blood Forming Organs | B01A_Antithrombotic Agents | 0.032 | 2.039E-07 | 6.691 |
| Cardiovascular System | C02C_ Antiadrenergic Agents, Peripherally Acting | 0.022 | 2.940E-04 | 3.532 |
| Cardiovascular System | C03A_Low-Ceiling Diuretics, Thiazides | 0.034 | 1.829E-08 | 7.738 |
| Cardiovascular System | C08C_Selective Calcium Channel Blockers with mainly Vascular Effects | 0.062 | 1.337E-24 | 23.874 |
| Cardiovascular System | C09A_Ace Inhibitors, Plain | 0.056 | 3.100E-20 | 19.509 |
| Cardiovascular System | C09C_Angiotensin Ii Receptor Blockers (Arbs), Plain | 0.039 | 1.972E-10 | 9.705 |
| Cardiovascular System | C10A_Lipid Modifying Agents, Plain | 0.042 | 3.608E-12 | 11.443 |
| Nervous System | N06A_Antidepressants | 0.055 | 1.274E-19 | 18.895 |
| **Subtype 3** | | | | |
| **PheWAS** | | | | |
| **cat_id** | **phe_name** | **r_value** | **p_value** | **-logp_value** |
| lifestyle and environment - general | 20118_11.0-Home area population density - urban or rural (0.0) | -0.025 | 4.035E-05 | 4.394 |
| lifestyle and environment - general | 6138#4-Qualifications (0.0) | -0.044 | 4.016E-13 | 12.396 |
| lifestyle and environment - general | 6139#3-Gas or solid-fuel cooking/heating (0.0) | -0.026 | 1.753E-05 | 4.756 |
| lifestyle and environment - general | 6160#100-Leisure/social activities (0.0) | 0.034 | 2.528E-08 | 7.597 |
| lifestyle and environment - general | 6160#1-Leisure/social activities (0.0) | -0.035 | 8.395E-09 | 8.076 |
| lifestyle and environment - general | 738-Average total household income before tax (0.0) | -0.038 | 6.681E-10 | 9.175 |
| lifestyle and environment - general | 2149-Lifetime number of sexual partners (0.0) | -0.038 | 3.184E-10 | 9.497 |
| lifestyle and environment - general | 3-Verbal interview duration (0.0) | -0.035 | 7.674E-09 | 8.115 |
| lifestyle and environment - general | 6-Conclusion duration (0.0) | -0.029 | 1.295E-06 | 5.888 |
| lifestyle and environment - general | 26414-Education score (England) (0.0) | 0.045 | 2.237E-13 | 12.650 |
| lifestyle and environment - exercise and work | 6164#2-Types of physical activity in last 4 weeks (0.0) | -0.026 | 1.354E-05 | 4.868 |
| lifestyle and environment - exercise and work | 6164#3-Types of physical activity in last 4 weeks (0.0) | -0.030 | 6.793E-07 | 6.168 |
| lifestyle and environment - exercise and work | 816-Job involves heavy manual or physical work (0.0) | 0.029 | 1.588E-06 | 5.799 |
| lifestyle and environment - exercise and work | 1070-Time spent watching television (TV) (0.0) | 0.053 | 1.691E-18 | 17.772 |
| lifestyle and environment - exercise and work | 1100-Drive faster than motorway speed limit (0.0) | -0.042 | 3.475E-12 | 11.459 |
| lifestyle and environment - exercise and work | 1110-Length of mobile phone use (0.0) | -0.029 | 1.415E-06 | 5.849 |
| lifestyle and environment - exercise and work | 1120-Weekly usage of mobile phone in last 3 months (0.0) | -0.033 | 7.795E-08 | 7.108 |
| lifestyle and environment - exercise and work | 1170-Getting up in morning (0.0) | 0.031 | 5.260E-07 | 6.279 |
| lifestyle and environment - exercise and work | 1180-Morning/evening person (chronotype) (0.0) | -0.047 | 1.191E-14 | 13.924 |
| lifestyle and environment - alcohol | 20405_0.0-Ever had known person concerned about, or recommend reduction of, alcohol consumption (0.0) | 0.029 | 1.273E-06 | 5.895 |
| lifestyle and environment - alcohol | 1558-Alcohol intake frequency. (0.0) | -0.031 | 2.946E-07 | 6.531 |
| lifestyle and environment - alcohol | 1568-Average weekly red wine intake (0.0) | -0.028 | 2.796E-06 | 5.554 |
| lifestyle and environment - alcohol | 20414-Frequency of drinking alcohol (0.0) | -0.034 | 2.507E-08 | 7.601 |
| lifestyle and environment - tobacco | 22506_0.0-Tobacco smoking (0.0) | 0.028 | 3.570E-06 | 5.447 |
| physical measures - general | 23099-Body fat percentage (0.0) | 0.026 | 1.796E-05 | 4.746 |
| physical measures - general | 23106-Impedance of whole body (0.0) | 0.034 | 3.476E-08 | 7.459 |
| physical measures - general | 23107-Impedance of leg (right) (0.0) | 0.033 | 4.953E-08 | 7.305 |
| physical measures - general | 23108-Impedance of leg (left) (0.0) | 0.036 | 5.081E-09 | 8.294 |
| physical measures - cardiac & blood vessels | 102-Pulse rate, automated reading (0.0) | 0.030 | 6.329E-07 | 6.199 |
| physical measures - cardiac & blood vessels | 12336-Ventricular rate (2.0) | 0.050 | 2.359E-16 | 15.627 |
| physical measures - cardiac & blood vessels | 12338-P duration (2.0) | -0.026 | 1.702E-05 | 4.769 |
| physical measures - cardiac & blood vessels | 22670-Minimum carotid IMT (intima-medial thickness) at 120 degrees  (2.0) | -0.042 | 2.897E-12 | 11.538 |
| physical measures - cardiac & blood vessels | 22671-Mean carotid IMT (intima-medial thickness) at 120 degrees  (2.0) | -0.046 | 2.040E-14 | 13.690 |
| physical measures - cardiac & blood vessels | 22672-Maximum carotid IMT (intima-medial thickness) at 120 degrees  (2.0) | -0.040 | 6.627E-11 | 10.179 |
| physical measures - cardiac & blood vessels | 22673-Minimum carotid IMT (intima-medial thickness) at 150 degrees  (2.0) | -0.041 | 1.013E-11 | 10.995 |
| physical measures - cardiac & blood vessels | 22674-Mean carotid IMT (intima-medial thickness) at 150 degrees  (2.0) | -0.041 | 1.157E-11 | 10.937 |
| physical measures - cardiac & blood vessels | 22675-Maximum carotid IMT (intima-medial thickness) at 150 degrees  (2.0) | -0.037 | 1.679E-09 | 8.775 |
| physical measures - cardiac & blood vessels | 22676-Minimum carotid IMT (intima-medial thickness) at 210 degrees  (2.0) | -0.032 | 1.687E-07 | 6.773 |
| physical measures - cardiac & blood vessels | 22677-Mean carotid IMT (intima-medial thickness) at 210 degrees  (2.0) | -0.035 | 6.167E-09 | 8.210 |
| physical measures - cardiac & blood vessels | 22678-Maximum carotid IMT (intima-medial thickness) at 210 degrees  (2.0) | -0.031 | 3.814E-07 | 6.419 |
| physical measures - cardiac & blood vessels | 22679-Minimum carotid IMT (intima-medial thickness) at 240 degrees  (2.0) | -0.033 | 6.964E-08 | 7.157 |
| physical measures - cardiac & blood vessels | 22680-Mean carotid IMT (intima-medial thickness) at 240 degrees  (2.0) | -0.034 | 2.895E-08 | 7.538 |
| physical measures - cardiac & blood vessels | 22681-Maximum carotid IMT (intima-medial thickness) at 240 degrees  (2.0) | -0.032 | 1.406E-07 | 6.852 |
| cognitive phenotypes | 6374-Number of puzzles viewed (2.0) | 0.025 | 2.958E-05 | 4.529 |
| cognitive phenotypes | 6383-Number of puzzles attempted (2.0) | 0.028 | 3.135E-06 | 5.504 |
| cognitive phenotypes | 400-Time to complete round (0.1) | -0.025 | 2.994E-05 | 4.524 |
| cognitive phenotypes | 6348-Duration to complete numeric path (trail #1) (2.0) | -0.029 | 1.540E-06 | 5.813 |
| cognitive phenotypes | 6350-Duration to complete alphanumeric path (trail #2) (2.0) | -0.026 | 2.425E-05 | 4.615 |
| cognitive phenotypes | 6772-Interval between previous point and current one in numeric path (trail #1) (2.0) | -0.031 | 2.769E-07 | 6.558 |
| mental health self-report | 20529_0.0-Victim of physically violent crime (0.0) | 0.025 | 3.468E-05 | 4.460 |
| mental health self-report | 1970-Nervous feelings (0.0) | 0.034 | 2.250E-08 | 7.648 |
| mental health self-report | 1980-Worrier / anxious feelings (0.0) | 0.027 | 9.229E-06 | 5.035 |
| mental health self-report | 2040-Risk taking (0.0) | -0.054 | 6.609E-19 | 18.180 |
| **DiaWAS** | | | | |
| **cat_id** | **phe_name** | **r_value** | **p_value** | **-logp_value** |
| circulatory system | Hypertension | -0.034 | 3.328E-08 | 7.478 |
| circulatory system | Essential hypertension | -0.034 | 2.784E-08 | 7.555 |
| **MedWAS** | | | | |
| **cat_id** | **phe_name** | **r_value** | **p_value** | **-logp_value** |
| Alimentary Tract and Metabolism | A01A_Stomatological Preparations | -0.035 | 6.806E-09 | 8.167 |
| Cardiovascular System | C09A_Ace Inhibitors, Plain | -0.022 | 3.329E-04 | 3.478 |
| **Subtype 4** | | | | |
| **PheWAS** | | | | |
| **cat_id** | **phe_name** | **r_value** | **p_value** | **-logp_value** |
| lifestyle and environment - general | 2395_1.0-Hair/balding pattern (0.0) | -0.039 | 2.385E-10 | 9.622 |
| lifestyle and environment - general | 2395_2.0-Hair/balding pattern (0.0) | -0.031 | 2.698E-07 | 6.569 |
| lifestyle and environment - general | 2395_3.0-Hair/balding pattern (0.0) | -0.044 | 2.942E-13 | 12.531 |
| lifestyle and environment - general | 2395_4.0-Hair/balding pattern (0.0) | -0.044 | 4.671E-13 | 12.331 |
| lifestyle and environment - general | 6142#1-Current employment status (0.0) | 0.033 | 3.714E-08 | 7.430 |
| lifestyle and environment - general | 6142#2-Current employment status (0.0) | -0.042 | 4.884E-12 | 11.311 |
| lifestyle and environment - general | 6160#2-Leisure/social activities (0.0) | -0.035 | 1.026E-08 | 7.989 |
| lifestyle and environment - general | 6160#5-Leisure/social activities (0.0) | 0.026 | 1.810E-05 | 4.742 |
| lifestyle and environment - general | 3-Verbal interview duration (0.0) | 0.025 | 3.534E-05 | 4.452 |
| lifestyle and environment - general | 767-Length of working week for main job (0.0) | -0.026 | 2.242E-05 | 4.649 |
| lifestyle and environment - exercise and work | 943-Frequency of stair climbing in last 4 weeks (0.0) | 0.025 | 2.780E-05 | 4.556 |
| lifestyle and environment - exercise and work | 1070-Time spent watching television (TV) (0.0) | -0.032 | 1.281E-07 | 6.892 |
| lifestyle and environment - exercise and work | 1180-Morning/evening person (chronotype) (0.0) | -0.035 | 1.124E-08 | 7.949 |
| lifestyle and environment - alcohol | 1558-Alcohol intake frequency. (0.0) | -0.028 | 5.981E-06 | 5.223 |
| lifestyle and environment - alcohol | 1588-Average weekly beer plus cider intake (0.0) | -0.048 | 2.695E-15 | 14.569 |
| lifestyle and environment - alcohol | 20403-Amount of alcohol drunk on a typical drinking day (0.0) | -0.025 | 3.958E-05 | 4.403 |
| lifestyle and environment - alcohol | 20416-Frequency of consuming six or more units of alcohol (0.0) | -0.034 | 2.939E-08 | 7.532 |
| physical measures - general | 1707_1.0-Handedness (chirality/laterality) (0.0) | 0.036 | 2.230E-09 | 8.652 |
| physical measures - general | 1707_2.0-Handedness (chirality/laterality) (0.0) | -0.035 | 1.248E-08 | 7.904 |
| physical measures - general | 46-Hand grip strength (left) (0.0) | -0.062 | 4.057E-24 | 23.392 |
| physical measures - general | 47-Hand grip strength (right) (0.0) | -0.051 | 3.122E-17 | 16.506 |
| physical measures - general | 48-Waist circumference (0.0) | -0.043 | 2.233E-12 | 11.651 |
| physical measures - general | 50-Standing height (0.0) | -0.060 | 4.391E-23 | 22.357 |
| physical measures - general | 3062-Forced vital capacity (FVC) (0.0) | -0.048 | 1.741E-15 | 14.759 |
| physical measures - general | 3063-Forced expiratory volume in 1-second (FEV1) (0.0) | -0.040 | 4.142E-11 | 10.383 |
| physical measures - general | 3064-Peak expiratory flow (PEF) (0.0) | -0.027 | 1.204E-05 | 4.920 |
| physical measures - general | 12143-Weight (pre-imaging) (2.0) | -0.038 | 3.637E-10 | 9.439 |
| physical measures - general | 12144-Height (2.0) | -0.062 | 2.366E-24 | 23.626 |
| physical measures - general | 20015-Sitting height (0.0) | -0.050 | 1.844E-16 | 15.734 |
| physical measures - general | 21002-Weight (0.0) | -0.041 | 1.461E-11 | 10.835 |
| physical measures - general | 23099-Body fat percentage (0.0) | 0.059 | 3.012E-22 | 21.521 |
| physical measures - general | 23100-Whole body fat mass (0.0) | 0.026 | 2.383E-05 | 4.623 |
| physical measures - general | 23101-Whole body fat-free mass (0.0) | -0.062 | 2.428E-24 | 23.615 |
| physical measures - general | 23102-Whole body water mass (2.0) | -0.062 | 9.224E-25 | 24.035 |
| physical measures - general | 23106-Impedance of whole body (0.0) | 0.050 | 1.802E-16 | 15.744 |
| physical measures - general | 23109-Impedance of arm (right) (0.0) | 0.061 | 1.941E-23 | 22.712 |
| physical measures - general | 23110-Impedance of arm (left) (0.0) | 0.062 | 1.533E-24 | 23.814 |
| physical measures - general | 23111-Leg fat percentage (right) (0.0) | 0.073 | 2.066E-33 | 32.685 |
| physical measures - general | 23112-Leg fat mass (right) (0.0) | 0.067 | 2.043E-28 | 27.690 |
| physical measures - general | 23113-Leg fat-free mass (right) (0.0) | -0.058 | 1.969E-21 | 20.706 |
| physical measures - general | 23119-Arm fat percentage (right) (0.0) | 0.060 | 3.713E-23 | 22.430 |
| physical measures - general | 23121-Arm fat-free mass (right) (0.0) | -0.063 | 1.573E-25 | 24.803 |
| physical measures - general | 23123-Arm fat percentage (left) (0.0) | 0.062 | 2.446E-24 | 23.612 |
| physical measures - general | 23125-Arm fat-free mass (left) (0.0) | -0.065 | 5.129E-27 | 26.290 |
| physical measures - general | 23126-Arm predicted mass (left) (0.0) | -0.065 | 1.233E-26 | 25.909 |
| physical measures - general | 23127-Trunk fat percentage (0.0) | 0.035 | 1.335E-08 | 7.875 |
| physical measures - cardiac & blood vessels | 102-Pulse rate, automated reading (0.0) | 0.030 | 8.163E-07 | 6.088 |
| cognitive phenotypes | 6373-Number of puzzles correctly solved (2.0) | 0.033 | 3.949E-08 | 7.404 |
| cognitive phenotypes | 400-Time to complete round (0.1) | -0.025 | 4.929E-05 | 4.307 |
| cognitive phenotypes | 404-Duration to first press of snap-button in each round (0.0) | -0.044 | 7.791E-13 | 12.108 |
| cognitive phenotypes | 6772-Interval between previous point and current one in numeric path (trail #1) (2.0) | -0.025 | 3.074E-05 | 4.512 |
| cognitive phenotypes | 6773-Interval between previous point and current one in alphanumeric path (trail #2) (2.0) | -0.026 | 2.475E-05 | 4.606 |
| cognitive phenotypes | 20023-Mean time to correctly identify matches (0.0) | -0.037 | 1.036E-09 | 8.985 |
| cognitive phenotypes | 20159-Number of symbol digit matches made correctly (0.0) | 0.025 | 4.894E-05 | 4.310 |
| cognitive phenotypes | 23324-Number of symbol digit matches made correctly (2.0) | 0.027 | 7.656E-06 | 5.116 |
| mental health self-report | 20531_1.0-Victim of sexual assault (0.0) | 0.030 | 1.154E-06 | 5.938 |
| mental health self-report | 1930-Miserableness (0.0) | 0.033 | 7.360E-08 | 7.133 |
| mental health self-report | 2090-Seen doctor (GP) for nerves, anxiety, tension or depression (0.0) | 0.031 | 2.391E-07 | 6.622 |
| mental health self-report | 20441-Ever had prolonged loss of interest in normal activities (0.0) | 0.029 | 1.357E-06 | 5.867 |
| mental health self-report | 20446-Ever had prolonged feelings of sadness or depression (0.0) | 0.028 | 4.889E-06 | 5.311 |
| mental health self-report | 20547#1-Activities undertaken to treat depression (0.1) | 0.025 | 3.587E-05 | 4.445 |
| mental health self-report | 2080-Frequency of tiredness / lethargy in last 2 weeks (0.0) | 0.035 | 8.224E-09 | 8.085 |
| physical measures - bone density and sizes | 4095-Heel ultrasound method (right) (2.0) | 0.027 | 6.999E-06 | 5.155 |
| physical measures - bone density and sizes | 78-Heel bone mineral density (BMD) T-score, automated (0.0) | -0.027 | 9.100E-06 | 5.041 |
| physical measures - bone density and sizes | 3143-Ankle spacing width (0.0) | -0.025 | 5.110E-05 | 4.292 |
| physical measures - bone density and sizes | 3144-Heel Broadband ultrasound attenuation, direct entry (0.0) | -0.040 | 4.925E-11 | 10.308 |
| physical measures - bone density and sizes | 4101-Heel broadband ultrasound attenuation (left) (0.0) | -0.025 | 4.452E-05 | 4.351 |
| blood assays | 30010-Red blood cell (erythrocyte) count (0.0) | -0.051 | 7.809E-17 | 16.107 |
| blood assays | 30020-Haemoglobin concentration (0.0) | -0.070 | 4.183E-31 | 30.379 |
| blood assays | 30030-Haematocrit percentage (0.0) | -0.066 | 2.241E-27 | 26.650 |
| blood assays | 30050-Mean corpuscular haemoglobin (0.0) | -0.030 | 1.009E-06 | 5.996 |
| blood assays | 30080-Platelet count (0.0) | 0.036 | 4.569E-09 | 8.340 |
| blood assays | 30090-Platelet crit (0.0) | 0.037 | 1.362E-09 | 8.866 |
| blood assays | 30130-Monocyte count (0.0) | -0.027 | 1.033E-05 | 4.986 |
| blood assays | 30630-Apolipoprotein A (0.0) | 0.025 | 4.433E-05 | 4.353 |
| blood assays | 30650-Aspartate aminotransferase (0.0) | -0.027 | 1.313E-05 | 4.882 |
| blood assays | 30660-Direct bilirubin (0.0) | -0.036 | 1.993E-09 | 8.701 |
| blood assays | 30700-Creatinine (0.0) | -0.076 | 5.844E-36 | 35.233 |
| blood assays | 30720-Cystatin C (0.0) | -0.045 | 1.297E-13 | 12.887 |
| blood assays | 30730-Gamma glutamyltransferase (0.0) | -0.043 | 9.610E-13 | 12.017 |
| blood assays | 30760-HDL cholesterol (0.0) | 0.030 | 1.038E-06 | 5.984 |
| blood assays | 30810-Phosphate (0.0) | 0.026 | 1.441E-05 | 4.841 |
| blood assays | 30830-SHBG (0.0) | 0.037 | 1.541E-09 | 8.812 |
| blood assays | 30840-Total bilirubin (0.0) | -0.037 | 7.173E-10 | 9.144 |
| blood assays | 30850-Testosterone (0.0) | -0.083 | 9.387E-43 | 42.027 |
| blood assays | 30880-Urate (0.0) | -0.078 | 1.793E-37 | 36.747 |
| **DiaWAS** | | | | |
| **cat_id** | **phe_name** | **r_value** | **p_value** | **-logp_value** |
| digestive | Inguinal hernia | -0.031 | 3.763E-07 | 6.424 |
| genitourinary | Disorders of menstruation and other abnormal bleeding from female genital tract | 0.026 | 1.377E-05 | 4.861 |
| musculoskeletal | Disorders of muscle, ligament, and fascia | -0.028 | 4.363E-06 | 5.360 |
| musculoskeletal | Fasciitis | -0.026 | 2.429E-05 | 4.615 |
| musculoskeletal | Contracture of palmar fascia [Dupuytren's disease] | -0.028 | 3.633E-06 | 5.440 |
| **MedWAS** | | | | |
| **cat_id** | **phe_name** | **r_value** | **p_value** | **-logp_value** |
| Alimentary Tract and Metabolism | A12A_Calcium | 0.025 | 3.418E-05 | 4.466 |
| Nervous System | N02B_Other Analgesics and Antipyretics | 0.024 | 6.649E-05 | 4.177 |
| Nervous System | N06A_Antidepressants | 0.032 | 2.042E-07 | 6.690 |
| **Subtype 5** | | | | |
| **PheWAS** | | | | |
| **cat_id** | **phe_name** | **r_value** | **p_value** | **-logp_value** |
| lifestyle and environment - general | 680_2.0-Own or rent accommodation lived in (0.0) | -0.025 | 4.958E-05 | 4.305 |
| lifestyle and environment - general | 2395_1.0-Hair/balding pattern (0.0) | 0.062 | 4.232E-24 | 23.373 |
| lifestyle and environment - general | 2395_2.0-Hair/balding pattern (0.0) | 0.070 | 1.964E-30 | 29.707 |
| lifestyle and environment - general | 2395_3.0-Hair/balding pattern (0.0) | 0.089 | 7.428E-49 | 48.129 |
| lifestyle and environment - general | 2395_4.0-Hair/balding pattern (0.0) | 0.066 | 3.947E-27 | 26.404 |
| lifestyle and environment - general | 1797-Father still alive (0.0) | -0.047 | 1.180E-14 | 13.928 |
| lifestyle and environment - general | 1835-Mother still alive (0.0) | -0.047 | 5.683E-15 | 14.245 |
| lifestyle and environment - general | 6138#4-Qualifications (0.0) | 0.026 | 1.787E-05 | 4.748 |
| lifestyle and environment - general | 6138#2-Qualifications (0.0) | -0.027 | 1.165E-05 | 4.934 |
| lifestyle and environment - general | 6142#2-Current employment status (0.0) | 0.040 | 5.291E-11 | 10.276 |
| lifestyle and environment - general | 6142#3-Current employment status (0.0) | -0.048 | 3.492E-15 | 14.457 |
| lifestyle and environment - general | 6141#2-How are people in household related to participant (0.0) | -0.037 | 9.598E-10 | 9.018 |
| lifestyle and environment - general | 6145#2-Illness, injury, bereavement, stress in last 2 years (0.0) | -0.026 | 1.954E-05 | 4.709 |
| lifestyle and environment - general | 6160#2-Leisure/social activities (0.0) | 0.038 | 3.049E-10 | 9.516 |
| lifestyle and environment - general | 709-Number in household (0.0) | -0.035 | 7.612E-09 | 8.118 |
| lifestyle and environment - general | 1031-Frequency of friend/family visits (0.0) | 0.032 | 1.597E-07 | 6.797 |
| lifestyle and environment - general | 4-Biometrics duration (0.0) | 0.028 | 4.205E-06 | 5.376 |
| lifestyle and environment - general | 767-Length of working week for main job (0.0) | 0.036 | 2.715E-09 | 8.566 |
| lifestyle and environment - general | 2139-Age first had sexual intercourse (0.0) | 0.036 | 2.601E-09 | 8.585 |
| lifestyle and environment - general | 24003-Nitrogen dioxide air pollution; 2010 (0.0) | 0.026 | 1.544E-05 | 4.811 |
| lifestyle and environment - general | 24016-Nitrogen dioxide air pollution; 2005 (0.0) | 0.027 | 1.282E-05 | 4.892 |
| lifestyle and environment - general | 24017-Nitrogen dioxide air pollution; 2006 (0.0) | 0.026 | 1.549E-05 | 4.810 |
| lifestyle and environment - general | 24018-Nitrogen dioxide air pollution; 2007 (0.0) | 0.025 | 3.975E-05 | 4.401 |
| lifestyle and environment - exercise and work | 1210-Snoring (0.0) | 0.025 | 4.660E-05 | 4.332 |
| lifestyle and environment - exercise and work | 6164#3-Types of physical activity in last 4 weeks (0.0) | 0.036 | 4.549E-09 | 8.342 |
| lifestyle and environment - exercise and work | 904-Number of days/week of vigorous physical activity 10+ minutes (0.0) | 0.041 | 2.167E-11 | 10.664 |
| lifestyle and environment - exercise and work | 1100-Drive faster than motorway speed limit (0.0) | 0.036 | 2.921E-09 | 8.534 |
| lifestyle and environment - exercise and work | 1170-Getting up in morning (0.0) | 0.027 | 1.069E-05 | 4.971 |
| lifestyle and environment - alcohol | 20405_0.0-Ever had known person concerned about, or recommend reduction of, alcohol consumption (0.0) | -0.025 | 3.819E-05 | 4.418 |
| lifestyle and environment - alcohol | 1558-Alcohol intake frequency. (0.0) | 0.037 | 9.044E-10 | 9.044 |
| lifestyle and environment - alcohol | 1588-Average weekly beer plus cider intake (0.0) | 0.073 | 3.911E-33 | 32.408 |
| lifestyle and environment - tobacco | 2877_3.0-Type of tobacco previously smoked (0.0) | 0.031 | 4.620E-07 | 6.335 |
| lifestyle and environment - tobacco | 20116_0.0-Smoking status (0.0) | -0.028 | 3.809E-06 | 5.419 |
| lifestyle and environment - tobacco | 20116_1.0-Smoking status (0.0) | 0.025 | 4.049E-05 | 4.393 |
| lifestyle and environment - tobacco | 20160-Ever smoked (0.0) | 0.031 | 3.717E-07 | 6.430 |
| lifestyle and environment - tobacco | 1249-Past tobacco smoking (0.0) | -0.031 | 3.665E-07 | 6.436 |
| physical measures - general | 1707_1.0-Handedness (chirality/laterality) (0.0) | -0.045 | 2.314E-13 | 12.636 |
| physical measures - general | 1707_2.0-Handedness (chirality/laterality) (0.0) | 0.043 | 1.061E-12 | 11.974 |
| physical measures - general | 46-Hand grip strength (left) (0.0) | 0.113 | 4.347E-77 | 76.362 |
| physical measures - general | 47-Hand grip strength (right) (0.0) | 0.109 | 7.376E-72 | 71.132 |
| physical measures - general | 48-Waist circumference (0.0) | 0.078 | 2.151E-37 | 36.667 |
| physical measures - general | 50-Standing height (0.0) | 0.117 | 2.135E-82 | 81.671 |
| physical measures - general | 3062-Forced vital capacity (FVC) (0.0) | 0.100 | 3.608E-61 | 60.443 |
| physical measures - general | 3063-Forced expiratory volume in 1-second (FEV1) (0.0) | 0.087 | 8.500E-47 | 46.071 |
| physical measures - general | 3064-Peak expiratory flow (PEF) (0.0) | 0.082 | 3.155E-41 | 40.501 |
| physical measures - general | 12143-Weight (pre-imaging) (2.0) | 0.059 | 1.605E-22 | 21.795 |
| physical measures - general | 12144-Height (2.0) | 0.115 | 9.453E-80 | 79.024 |
| physical measures - general | 20015-Sitting height (0.0) | 0.105 | 5.329E-67 | 66.273 |
| physical measures - general | 21002-Weight (0.0) | 0.071 | 2.449E-31 | 30.611 |
| physical measures - general | 23099-Body fat percentage (0.0) | -0.130 | 1.134E-101 | 100.946 |
| physical measures - general | 23100-Whole body fat mass (0.0) | -0.066 | 2.068E-27 | 26.684 |
| physical measures - general | 23101-Whole body fat-free mass (0.0) | 0.126 | 1.543E-95 | 94.812 |
| physical measures - general | 23102-Whole body water mass (2.0) | 0.119 | 1.985E-86 | 85.702 |
| physical measures - general | 23106-Impedance of whole body (0.0) | -0.119 | 3.514E-85 | 84.454 |
| physical measures - general | 23107-Impedance of leg (right) (0.0) | -0.081 | 7.045E-41 | 40.152 |
| physical measures - general | 23108-Impedance of leg (left) (0.0) | -0.075 | 5.261E-35 | 34.279 |
| physical measures - general | 23109-Impedance of arm (right) (0.0) | -0.125 | 1.894E-94 | 93.723 |
| physical measures - general | 23110-Impedance of arm (left) (0.0) | -0.128 | 2.001E-99 | 98.699 |
| physical measures - general | 23111-Leg fat percentage (right) (0.0) | -0.149 | 1.684E-133 | 132.774 |
| physical measures - general | 23112-Leg fat mass (right) (0.0) | -0.134 | 4.237E-109 | 108.373 |
| physical measures - general | 23113-Leg fat-free mass (right) (0.0) | 0.121 | 3.715E-88 | 87.430 |
| physical measures - general | 23119-Arm fat percentage (right) (0.0) | -0.131 | 4.368E-104 | 103.360 |
| physical measures - general | 23120-Arm fat mass (right) (0.0) | -0.061 | 1.159E-23 | 22.936 |
| physical measures - general | 23121-Arm fat-free mass (right) (0.0) | 0.125 | 3.881E-95 | 94.411 |
| physical measures - general | 23123-Arm fat percentage (left) (0.0) | -0.138 | 3.071E-114 | 113.513 |
| physical measures - general | 23125-Arm fat-free mass (left) (0.0) | 0.126 | 1.073E-96 | 95.969 |
| physical measures - general | 23126-Arm predicted mass (left) (0.0) | 0.128 | 4.264E-99 | 98.370 |
| physical measures - general | 23127-Trunk fat percentage (0.0) | -0.086 | 5.469E-46 | 45.262 |
| physical measures - cardiac & blood vessels | 102-Pulse rate, automated reading (0.0) | -0.031 | 3.828E-07 | 6.417 |
| physical measures - cardiac & blood vessels | 4079-Diastolic blood pressure, automated reading (0.0) | 0.048 | 2.648E-15 | 14.577 |
| physical measures - cardiac & blood vessels | 4080-Systolic blood pressure, automated reading (0.0) | 0.066 | 4.008E-27 | 26.397 |
| physical measures - cardiac & blood vessels | 4195-Pulse wave reflection index (0.0) | 0.026 | 2.382E-05 | 4.623 |
| physical measures - cardiac & blood vessels | 12340-QRS duration (2.0) | 0.055 | 1.306E-19 | 18.884 |
| physical measures - cardiac & blood vessels | 21021-Pulse wave Arterial Stiffness index (0.0) | 0.026 | 2.040E-05 | 4.690 |
| physical measures - cardiac & blood vessels | 22670-Minimum carotid IMT (intima-medial thickness) at 120 degrees  (2.0) | 0.042 | 4.187E-12 | 11.378 |
| physical measures - cardiac & blood vessels | 22671-Mean carotid IMT (intima-medial thickness) at 120 degrees  (2.0) | 0.050 | 1.335E-16 | 15.874 |
| physical measures - cardiac & blood vessels | 22672-Maximum carotid IMT (intima-medial thickness) at 120 degrees  (2.0) | 0.047 | 1.935E-14 | 13.713 |
| physical measures - cardiac & blood vessels | 22673-Minimum carotid IMT (intima-medial thickness) at 150 degrees  (2.0) | 0.044 | 8.126E-13 | 12.090 |
| physical measures - cardiac & blood vessels | 22674-Mean carotid IMT (intima-medial thickness) at 150 degrees  (2.0) | 0.040 | 5.595E-11 | 10.252 |
| physical measures - cardiac & blood vessels | 22675-Maximum carotid IMT (intima-medial thickness) at 150 degrees  (2.0) | 0.035 | 8.386E-09 | 8.076 |
| physical measures - cardiac & blood vessels | 22676-Minimum carotid IMT (intima-medial thickness) at 210 degrees  (2.0) | 0.047 | 1.707E-14 | 13.768 |
| physical measures - cardiac & blood vessels | 22677-Mean carotid IMT (intima-medial thickness) at 210 degrees  (2.0) | 0.051 | 4.114E-17 | 16.386 |
| physical measures - cardiac & blood vessels | 22678-Maximum carotid IMT (intima-medial thickness) at 210 degrees  (2.0) | 0.046 | 6.560E-14 | 13.183 |
| physical measures - cardiac & blood vessels | 22679-Minimum carotid IMT (intima-medial thickness) at 240 degrees  (2.0) | 0.052 | 5.944E-18 | 17.226 |
| physical measures - cardiac & blood vessels | 22680-Mean carotid IMT (intima-medial thickness) at 240 degrees  (2.0) | 0.060 | 2.451E-23 | 22.611 |
| physical measures - cardiac & blood vessels | 22681-Maximum carotid IMT (intima-medial thickness) at 240 degrees  (2.0) | 0.057 | 4.925E-21 | 20.308 |
| cognitive phenotypes | 20152-Reproduciblity of spirometry measurement using ERS/ATS criteria (0.0) | -0.030 | 1.161E-06 | 5.935 |
| cognitive phenotypes | 399-Number of incorrect matches in round (0.1) | 0.030 | 7.580E-07 | 6.120 |
| cognitive phenotypes | 400-Time to complete round (0.1) | 0.034 | 1.452E-08 | 7.838 |
| cognitive phenotypes | 4290-Duration screen displayed (0.0) | 0.027 | 8.841E-06 | 5.054 |
| cognitive phenotypes | 6348-Duration to complete numeric path (trail #1) (2.0) | 0.047 | 1.360E-14 | 13.867 |
| cognitive phenotypes | 6350-Duration to complete alphanumeric path (trail #2) (2.0) | 0.035 | 1.398E-08 | 7.854 |
| cognitive phenotypes | 6772-Interval between previous point and current one in numeric path (trail #1) (2.0) | 0.042 | 5.265E-12 | 11.279 |
| cognitive phenotypes | 6773-Interval between previous point and current one in alphanumeric path (trail #2) (2.0) | 0.035 | 8.889E-09 | 8.051 |
| cognitive phenotypes | 20133-Time to complete round (0.0) | 0.033 | 5.998E-08 | 7.222 |
| cognitive phenotypes | 20153-Forced expiratory volume in 1-second (FEV1), predicted (0.0) | 0.038 | 2.484E-10 | 9.605 |
| cognitive phenotypes | 20156-Duration to complete numeric path (trail #1) (0.0) | 0.029 | 2.317E-06 | 5.635 |
| cognitive phenotypes | 20159-Number of symbol digit matches made correctly (0.0) | -0.029 | 1.780E-06 | 5.750 |
| cognitive phenotypes | 20195-Number of symbol digit matches attempted (0.0) | -0.026 | 2.340E-05 | 4.631 |
| cognitive phenotypes | 23323-Number of symbol digit matches attempted (2.0) | -0.033 | 5.784E-08 | 7.238 |
| cognitive phenotypes | 23324-Number of symbol digit matches made correctly (2.0) | -0.026 | 2.547E-05 | 4.594 |
| mental health self-report | 20531_1.0-Victim of sexual assault (0.0) | -0.026 | 1.414E-05 | 4.850 |
| mental health self-report | 20536_2.0-Weight change during worst episode of depression (0.0) | -0.037 | 1.855E-09 | 8.732 |
| mental health self-report | 1930-Miserableness (0.0) | -0.039 | 1.821E-10 | 9.740 |
| mental health self-report | 1950-Sensitivity / hurt feelings (0.0) | -0.034 | 2.139E-08 | 7.670 |
| mental health self-report | 1960-Fed-up feelings (0.0) | -0.029 | 2.210E-06 | 5.656 |
| mental health self-report | 1980-Worrier / anxious feelings (0.0) | -0.028 | 3.676E-06 | 5.435 |
| mental health self-report | 2000-Worry too long after embarrassment (0.0) | -0.034 | 2.155E-08 | 7.667 |
| mental health self-report | 2030-Guilty feelings (0.0) | -0.040 | 5.932E-11 | 10.227 |
| mental health self-report | 2040-Risk taking (0.0) | 0.038 | 3.197E-10 | 9.495 |
| mental health self-report | 2090-Seen doctor (GP) for nerves, anxiety, tension or depression (0.0) | -0.030 | 7.164E-07 | 6.145 |
| mental health self-report | 20446-Ever had prolonged feelings of sadness or depression (0.0) | -0.025 | 3.532E-05 | 4.452 |
| mental health self-report | 2080-Frequency of tiredness / lethargy in last 2 weeks (0.0) | -0.032 | 1.618E-07 | 6.791 |
| mental health self-report | 2110-Able to confide (0.0) | -0.025 | 3.609E-05 | 4.443 |
| mental health self-report | 20453-Ever taken cannabis (0.0) | 0.025 | 3.422E-05 | 4.466 |
| mental health self-report | 20511-Recent poor appetite or overeating (0.0) | -0.028 | 5.450E-06 | 5.264 |
| mental health self-report | 20520-Recent worrying too much about different things (0.0) | -0.026 | 1.587E-05 | 4.799 |
| mental health self-report | 20521-Belittlement by partner or ex-partner as an adult (0.0) | -0.026 | 1.511E-05 | 4.821 |
| physical measures - bone density and sizes | 3143-Ankle spacing width (0.0) | 0.048 | 2.224E-15 | 14.653 |
| physical measures - bone density and sizes | 3144-Heel Broadband ultrasound attenuation, direct entry (0.0) | 0.031 | 4.506E-07 | 6.346 |
| physical measures - bone density and sizes | 4100-Ankle spacing width (left) (0.0) | 0.041 | 1.458E-11 | 10.836 |
| physical measures - bone density and sizes | 4119-Ankle spacing width (right) (0.0) | 0.032 | 1.845E-07 | 6.734 |
| blood assays | 30150-Eosinophill count (0.0) | 0.026 | 1.418E-05 | 4.848 |
| blood assays | 30010-Red blood cell (erythrocyte) count (0.0) | 0.091 | 2.058E-50 | 49.687 |
| blood assays | 30020-Haemoglobin concentration (0.0) | 0.113 | 6.008E-78 | 77.221 |
| blood assays | 30030-Haematocrit percentage (0.0) | 0.116 | 4.330E-82 | 81.364 |
| blood assays | 30040-Mean corpuscular volume (0.0) | 0.040 | 3.100E-11 | 10.509 |
| blood assays | 30050-Mean corpuscular haemoglobin (0.0) | 0.036 | 3.008E-09 | 8.522 |
| blood assays | 30080-Platelet count (0.0) | -0.045 | 1.322E-13 | 12.879 |
| blood assays | 30090-Platelet crit (0.0) | -0.061 | 7.608E-24 | 23.119 |
| blood assays | 30130-Monocyte count (0.0) | 0.033 | 6.135E-08 | 7.212 |
| blood assays | 30190-Monocyte percentage (0.0) | 0.043 | 1.060E-12 | 11.975 |
| blood assays | 30620-Alanine aminotransferase (0.0) | 0.072 | 2.070E-32 | 31.684 |
| blood assays | 30630-Apolipoprotein A (0.0) | -0.030 | 5.732E-07 | 6.242 |
| blood assays | 30650-Aspartate aminotransferase (0.0) | 0.073 | 3.601E-33 | 32.444 |
| blood assays | 30660-Direct bilirubin (0.0) | 0.039 | 2.017E-10 | 9.695 |
| blood assays | 30670-Urea (0.0) | 0.046 | 2.686E-14 | 13.571 |
| blood assays | 30700-Creatinine (0.0) | 0.106 | 2.711E-68 | 67.567 |
| blood assays | 30720-Cystatin C (0.0) | 0.055 | 2.300E-19 | 18.638 |
| blood assays | 30730-Gamma glutamyltransferase (0.0) | 0.062 | 9.338E-25 | 24.030 |
| blood assays | 30760-HDL cholesterol (0.0) | -0.040 | 5.693E-11 | 10.245 |
| blood assays | 30810-Phosphate (0.0) | -0.035 | 1.005E-08 | 7.998 |
| blood assays | 30830-SHBG (0.0) | -0.048 | 1.928E-15 | 14.715 |
| blood assays | 30840-Total bilirubin (0.0) | 0.051 | 2.554E-17 | 16.593 |
| blood assays | 30850-Testosterone (0.0) | 0.133 | 1.340E-106 | 105.873 |
| blood assays | 30870-Triglycerides (0.0) | 0.039 | 9.827E-11 | 10.008 |
| blood assays | 30880-Urate (0.0) | 0.095 | 1.114E-54 | 53.953 |
| **DiaWAS** | | | | |
| **cat_id** | **phe_name** | **r_value** | **p_value** | **-logp_value** |
| neoplasms | Breast cancer | -0.026 | 2.718E-05 | 4.566 |
| neoplasms | Cancer of prostate | 0.033 | 6.510E-08 | 7.186 |
| neoplasms | Benign neoplasm of uterus | -0.034 | 1.837E-08 | 7.736 |
| neoplasms | Uterine leiomyoma | -0.034 | 3.023E-08 | 7.519 |
| circulatory system | Hypertension | 0.033 | 8.381E-08 | 7.077 |
| circulatory system | Essential hypertension | 0.032 | 9.440E-08 | 7.025 |
| circulatory system | Atrial fibrillation and flutter | 0.027 | 6.345E-06 | 5.198 |
| digestive | Inguinal hernia | 0.041 | 1.807E-11 | 10.743 |
| genitourinary | Hyperplasia of prostate | 0.044 | 5.027E-13 | 12.299 |
| genitourinary | Genital prolapse | -0.035 | 1.022E-08 | 7.991 |
| genitourinary | Prolapse of vaginal walls | -0.035 | 1.323E-08 | 7.879 |
| genitourinary | Noninflammatory female genital disorders | -0.041 | 9.257E-12 | 11.034 |
| genitourinary | Noninflammatory disorders of ovary, fallopian tube, and broad ligament | -0.026 | 1.584E-05 | 4.800 |
| genitourinary | Disorders of uterus, NEC | -0.026 | 1.815E-05 | 4.741 |
| genitourinary | stress incontinence, female | -0.028 | 5.411E-06 | 5.267 |
| genitourinary | Disorders of menstruation and other abnormal bleeding from female genital tract | -0.048 | 2.766E-15 | 14.558 |
| genitourinary | Irregular menstrual cycle/bleeding | -0.046 | 6.843E-14 | 13.165 |
| genitourinary | Excessive or frequent menstruation | -0.040 | 2.729E-11 | 10.564 |
| genitourinary | Menopausal and postmenopausal disorders | -0.025 | 3.063E-05 | 4.514 |
| genitourinary | Ovarian cyst | -0.026 | 2.047E-05 | 4.689 |
| pregnancy complications | Early or threatened labor; hemorrhage in early pregnancy | -0.027 | 1.036E-05 | 4.985 |
| pregnancy complications | Normal delivery | -0.035 | 1.357E-08 | 7.867 |
| pregnancy complications | Known or suspected fetal abnormality affecting management of mother | -0.034 | 2.547E-08 | 7.594 |
| pregnancy complications | Obstetrical/birth trauma | -0.043 | 8.939E-13 | 12.049 |
| pregnancy complications | Complications of labor and delivery NEC | -0.027 | 9.185E-06 | 5.037 |
| symptoms | Abdominal pain | -0.025 | 2.848E-05 | 4.545 |
| **MedWAS** | | | | |
| **cat_id** | **phe_name** | **r_value** | **p_value** | **-logp_value** |
| Alimentary Tract and Metabolism | A01A_Stomatological Preparations | 0.032 | 1.763E-07 | 6.754 |
| Blood and Blood Forming Organs | B01A_Antithrombotic Agents | 0.029 | 2.769E-06 | 5.558 |
| Cardiovascular System | C01A_Cardiac Glycosides | 0.030 | 1.204E-06 | 5.920 |
| Cardiovascular System | C01E_Other Cardiac Preparations | -0.037 | 1.810E-09 | 8.742 |
| Cardiovascular System | C07A_Beta Blocking Agents | 0.023 | 1.531E-04 | 3.815 |
| Cardiovascular System | C08C_Selective Calcium Channel Blockers with mainly Vascular Effects | 0.034 | 2.974E-08 | 7.527 |
| Cardiovascular System | C09A_Ace Inhibitors, Plain | 0.036 | 4.095E-09 | 8.388 |
| Cardiovascular System | C09C_Angiotensin Ii Receptor Blockers (Arbs), Plain | 0.029 | 1.877E-06 | 5.727 |
| Cardiovascular System | C10A_Lipid Modifying Agents, Plain | 0.046 | 3.560E-14 | 13.449 |
| Genito Urinary System and Sex Hormones | G03A_Hormonal Contraceptives for Systemic Use | -0.024 | 7.266E-05 | 4.139 |
| Genito Urinary System and Sex Hormones | G03C_Estrogens | -0.027 | 6.733E-06 | 5.172 |
| Genito Urinary System and Sex Hormones | G04C_Drugs Used in Benign Prostatic Hypertrophy | 0.032 | 1.029E-07 | 6.988 |
| Systemic Hormonal Preparations, Excl. Sex Hormones and Insulins | H03A_Thyroid Preparations | -0.028 | 5.169E-06 | 5.287 |
| Musculo-Skeletal System | M04A_Antigout Preparations | 0.022 | 3.133E-04 | 3.504 |
| Nervous System | N02B_Other Analgesics and Antipyretics | -0.042 | 5.356E-12 | 11.271 |
| Nervous System | N06A_Antidepressants | -0.031 | 3.507E-07 | 6.455 |
| Sensory Organs | S01E_Antiglaucoma Preparations and Miotics | 0.022 | 2.681E-04 | 3.572 |

Supplementary Table 3. Phenotypic associations of the ABCD cohort

| **Subtype 1** | | | | |
| --- | --- | --- | --- | --- |
| **cat_id** | **phe_name** | **r_value** | **p_value** | **-logp_value** |
| Demographics | ('interview_age', 'baseline_year_1_arm_1') | 0.088 | 1.641E-19 | 18.785 |
| Demographics | ('interview_age', 'screener_arm_1') | 0.088 | 1.641E-19 | 18.785 |
| Demographics | ('demo_prnt_age_v2_l', 'baseline_year_1_arm_1') | 0.058 | 1.848E-09 | 8.733 |
| Demographics | ('demo_brthdat_v2', 'baseline_year_1_arm_1') | 0.079 | 3.546E-16 | 15.450 |
| Demographics | ('demo_prnt_age_v2', 'baseline_year_1_arm_1') | 0.060 | 6.557E-10 | 9.183 |
| Demographics | ('demo_ed_v2', 'baseline_year_1_arm_1')_4.0 | -0.049 | 3.860E-07 | 6.413 |
| Demographics | ('demo_ed_v2', 'baseline_year_1_arm_1')_5.0 | 0.070 | 7.077E-13 | 12.150 |
| Demographics | ('demo_race_a_p___10', 'baseline_year_1_arm_1')_0.0 | -0.090 | 2.179E-20 | 19.662 |
| Demographics | ('demo_race_a_p___10', 'baseline_year_1_arm_1')_1.0 | 0.090 | 2.179E-20 | 19.662 |
| Demographics | ('demo_race_a_p___11', 'baseline_year_1_arm_1')_0.0 | 0.094 | 3.259E-22 | 21.487 |
| Demographics | ('demo_race_a_p___11', 'baseline_year_1_arm_1')_1.0 | -0.094 | 3.259E-22 | 21.487 |
| Demographics | ('demo_prnt_race_a_v2___10', 'baseline_year_1_arm_1')_0.0 | -0.091 | 1.211E-20 | 19.917 |
| Demographics | ('demo_prnt_race_a_v2___10', 'baseline_year_1_arm_1')_1.0 | 0.091 | 1.211E-20 | 19.917 |
| Demographics | ('demo_prnt_race_a_v2___11', 'baseline_year_1_arm_1')_0.0 | 0.085 | 2.483E-18 | 17.605 |
| Demographics | ('demo_prnt_race_a_v2___11', 'baseline_year_1_arm_1')_1.0 | -0.085 | 2.483E-18 | 17.605 |
| Demographics | ('demo_prnt_marital_v2', 'baseline_year_1_arm_1')_1.0 | 0.046 | 2.267E-06 | 5.645 |
| Demographics | ('demo_comb_income_v2', 'baseline_year_1_arm_1')_2.0 | -0.049 | 5.663E-07 | 6.247 |
| Demographics | ('demo_fam_exp3_v2', 'baseline_year_1_arm_1')_0.0 | 0.047 | 1.703E-06 | 5.769 |
| Demographics | ('demo_fam_exp3_v2', 'baseline_year_1_arm_1')_1.0 | -0.047 | 1.703E-06 | 5.769 |
| Demographics | ('fam_roster_2c_v2', 'baseline_year_1_arm_1')_1.0 | 0.048 | 7.875E-07 | 6.104 |
| Socioeconomic | ('ethnicity', '')_1.0 | 0.100 | 5.356E-25 | 24.271 |
| Socioeconomic | ('ethnicity', '')_2.0 | -0.080 | 1.359E-16 | 15.867 |
| Socioeconomic | ('genetic_af_african', 'baseline_year_1_arm_1') | -0.091 | 4.813E-21 | 20.318 |
| Socioeconomic | ('genetic_af_european', 'baseline_year_1_arm_1') | 0.111 | 2.039E-30 | 29.691 |
| Socioeconomic | ('genetic_af_east_asian', 'baseline_year_1_arm_1') | -0.045 | 4.280E-06 | 5.369 |
| Socioeconomic | ('reshist_addr1_adi_edu_h', 'baseline_year_1_arm_1') | 0.046 | 2.228E-06 | 5.652 |
| Socioeconomic | ('reshist_addr1_adi_income', 'baseline_year_1_arm_1') | 0.059 | 1.022E-09 | 8.991 |
| Socioeconomic | ('reshist_addr1_adi_in_dis', 'baseline_year_1_arm_1') | -0.054 | 3.052E-08 | 7.515 |
| Socioeconomic | ('reshist_addr1_adi_home_o', 'baseline_year_1_arm_1') | 0.048 | 6.767E-07 | 6.170 |
| Socioeconomic | ('reshist_addr1_adi_unemp', 'baseline_year_1_arm_1') | -0.057 | 3.821E-09 | 8.418 |
| Socioeconomic | ('reshist_addr1_adi_pov', 'baseline_year_1_arm_1') | -0.063 | 6.951E-11 | 10.158 |
| Socioeconomic | ('reshist_addr1_adi_b138', 'baseline_year_1_arm_1') | -0.056 | 7.674E-09 | 8.115 |
| Socioeconomic | ('reshist_addr1_adi_sp', 'baseline_year_1_arm_1') | -0.071 | 2.500E-13 | 12.602 |
| Socioeconomic | ('reshist_addr1_adi_ncar', 'baseline_year_1_arm_1') | -0.046 | 2.075E-06 | 5.683 |
| Socioeconomic | ('reshist_addr1_adi_wsum', 'baseline_year_1_arm_1') | -0.050 | 2.945E-07 | 6.531 |
| Socioeconomic | ('reshist_addr1_adi_perc', 'baseline_year_1_arm_1') | -0.066 | 8.528E-12 | 11.069 |
| Socioeconomic | ('reshist_addr1_leadrisk_poverty', 'baseline_year_1_arm_1') | -0.059 | 1.536E-09 | 8.813 |
| Socioeconomic | ('reshist_addr1_coi_z_coi_nat', 'baseline_year_1_arm_1') | 0.065 | 1.924E-11 | 10.716 |
| Socioeconomic | ('reshist_addr1_coi_c5_ed_nat', 'baseline_year_1_arm_1') | 0.043 | 7.897E-06 | 5.103 |
| Socioeconomic | ('reshist_addr1_coi_c5_he_nat', 'baseline_year_1_arm_1') | 0.052 | 9.647E-08 | 7.016 |
| Socioeconomic | ('reshist_addr1_coi_c5_se_nat', 'baseline_year_1_arm_1') | 0.066 | 1.130E-11 | 10.947 |
| Socioeconomic | ('reshist_addr1_coi_c5_coi_nat', 'baseline_year_1_arm_1') | 0.076 | 5.627E-15 | 14.250 |
| Socioeconomic | ('reshist_addr1_coi_r_ed_nat', 'baseline_year_1_arm_1') | 0.053 | 4.299E-08 | 7.367 |
| Socioeconomic | ('reshist_addr1_coi_r_he_nat', 'baseline_year_1_arm_1') | 0.050 | 2.856E-07 | 6.544 |
| Socioeconomic | ('reshist_addr1_coi_r_se_nat', 'baseline_year_1_arm_1') | 0.070 | 6.237E-13 | 12.205 |
| Socioeconomic | ('reshist_addr1_coi_r_coi_nat', 'baseline_year_1_arm_1') | 0.065 | 2.109E-11 | 10.676 |
| Socioeconomic | ('reshist_addr1_coi_c5_ed_stt', 'baseline_year_1_arm_1') | 0.048 | 6.685E-07 | 6.175 |
| Socioeconomic | ('reshist_addr1_coi_c5_he_stt', 'baseline_year_1_arm_1') | 0.062 | 1.468E-10 | 9.833 |
| Socioeconomic | ('reshist_addr1_coi_c5_se_stt', 'baseline_year_1_arm_1') | 0.074 | 2.588E-14 | 13.587 |
| Socioeconomic | ('reshist_addr1_coi_c5_coi_stt', 'baseline_year_1_arm_1') | 0.067 | 5.281E-12 | 11.277 |
| Socioeconomic | ('reshist_addr1_coi_r_ed_stt', 'baseline_year_1_arm_1') | 0.046 | 1.801E-06 | 5.745 |
| Socioeconomic | ('reshist_addr1_coi_r_he_stt', 'baseline_year_1_arm_1') | 0.065 | 1.847E-11 | 10.733 |
| Socioeconomic | ('reshist_addr1_coi_r_se_stt', 'baseline_year_1_arm_1') | 0.076 | 4.028E-15 | 14.395 |
| Socioeconomic | ('reshist_addr1_coi_r_coi_stt', 'baseline_year_1_arm_1') | 0.069 | 1.767E-12 | 11.753 |
| Socioeconomic | ('reshist_addr1_coi_ed_attain', 'baseline_year_1_arm_1') | 0.048 | 6.642E-07 | 6.178 |
| Socioeconomic | ('reshist_addr1_coi_ed_schpov', 'baseline_year_1_arm_1') | -0.050 | 2.406E-07 | 6.619 |
| Socioeconomic | ('reshist_addr1_coi_se_povrate', 'baseline_year_1_arm_1') | -0.061 | 4.236E-10 | 9.373 |
| Socioeconomic | ('reshist_addr1_coi_se_public', 'baseline_year_1_arm_1') | -0.059 | 9.653E-10 | 9.015 |
| Socioeconomic | ('reshist_addr1_coi_se_home', 'baseline_year_1_arm_1') | 0.046 | 2.286E-06 | 5.641 |
| Socioeconomic | ('reshist_addr1_coi_se_occ', 'baseline_year_1_arm_1') | 0.048 | 8.656E-07 | 6.063 |
| Socioeconomic | ('reshist_addr1_coi_se_mhe', 'baseline_year_1_arm_1') | 0.051 | 1.923E-07 | 6.716 |
| Socioeconomic | ('reshist_addr1_coi_se_emprat', 'baseline_year_1_arm_1') | 0.050 | 3.200E-07 | 6.495 |
| Socioeconomic | ('reshist_addr1_coi_se_single', 'baseline_year_1_arm_1') | -0.073 | 6.046E-14 | 13.219 |
| Socioeconomic | ('reshist_addr1_coi_zed_attain', 'baseline_year_1_arm_1') | 0.052 | 1.123E-07 | 6.950 |
| Socioeconomic | ('reshist_addr1_coi_zed_schpov', 'baseline_year_1_arm_1') | 0.054 | 2.171E-08 | 7.663 |
| Socioeconomic | ('reshist_addr1_coi_zhe_hlthins', 'baseline_year_1_arm_1') | 0.043 | 8.529E-06 | 5.069 |
| Socioeconomic | ('reshist_addr1_coi_zhe_vacancy', 'baseline_year_1_arm_1') | 0.044 | 6.400E-06 | 5.194 |
| Socioeconomic | ('reshist_addr1_coi_zse_povrate', 'baseline_year_1_arm_1') | 0.055 | 1.532E-08 | 7.815 |
| Socioeconomic | ('reshist_addr1_coi_zse_public', 'baseline_year_1_arm_1') | 0.060 | 6.120E-10 | 9.213 |
| Socioeconomic | ('reshist_addr1_coi_zse_occ', 'baseline_year_1_arm_1') | 0.052 | 1.196E-07 | 6.922 |
| Socioeconomic | ('reshist_addr1_coi_zse_mhe', 'baseline_year_1_arm_1') | 0.056 | 8.542E-09 | 8.068 |
| Socioeconomic | ('reshist_addr1_coi_zse_emprat', 'baseline_year_1_arm_1') | 0.055 | 2.065E-08 | 7.685 |
| Socioeconomic | ('reshist_addr1_coi_zse_single', 'baseline_year_1_arm_1') | 0.074 | 1.874E-14 | 13.727 |
| Socioeconomic | ('reshist_addr1_coi_zse_ecres', 'baseline_year_1_arm_1') | 0.061 | 2.856E-10 | 9.544 |
| Socioeconomic | ('reshist_addr1_svi_tot_20142018', 'baseline_year_1_arm_1') | -0.065 | 3.158E-11 | 10.501 |
| Socioeconomic | ('reshist_addr1_svi_pov_20142018', 'baseline_year_1_arm_1') | -0.064 | 4.043E-11 | 10.393 |
| Socioeconomic | ('reshist_addr1_svi_emp_20142018', 'baseline_year_1_arm_1') | -0.052 | 7.394E-08 | 7.131 |
| Socioeconomic | ('reshist_addr1_svi_cap_20142018', 'baseline_year_1_arm_1') | -0.061 | 4.384E-10 | 9.358 |
| Socioeconomic | ('reshist_addr1_svi_hs_20142018', 'baseline_year_1_arm_1') | -0.050 | 2.577E-07 | 6.589 |
| Socioeconomic | ('reshist_addr1_svi_sin_20142018', 'baseline_year_1_arm_1') | -0.062 | 1.603E-10 | 9.795 |
| Socioeconomic | ('reshist_addr1_svi_min_20142018', 'baseline_year_1_arm_1') | -0.065 | 1.720E-11 | 10.764 |
| Socioeconomic | ('reshist_addr1_svi_th1_20142018', 'baseline_year_1_arm_1') | -0.068 | 2.203E-12 | 11.657 |
| Socioeconomic | ('reshist_addr1_svi_th2_20142018', 'baseline_year_1_arm_1') | -0.055 | 1.244E-08 | 7.905 |
| Socioeconomic | ('reshist_addr1_svi_th3_20142018', 'baseline_year_1_arm_1') | -0.048 | 8.067E-07 | 6.093 |
| Socioeconomic | ('reshist_addr1_opat_kfrpp_p1', 'baseline_year_1_arm_1') | 0.055 | 1.333E-08 | 7.875 |
| Socioeconomic | ('reshist_addr1_opat_kfrpp_p25', 'baseline_year_1_arm_1') | 0.063 | 7.300E-11 | 10.137 |
| Socioeconomic | ('reshist_addr1_opat_kfrpp_p50', 'baseline_year_1_arm_1') | 0.068 | 3.077E-12 | 11.512 |
| Socioeconomic | ('reshist_addr1_opat_kfrpp_p75', 'baseline_year_1_arm_1') | 0.071 | 3.274E-13 | 12.485 |
| Socioeconomic | ('reshist_addr1_opat_kfrpp_p100', 'baseline_year_1_arm_1') | 0.053 | 5.544E-08 | 7.256 |
| Socioeconomic | ('reshist_addr1_opat_kfrpp_avg', 'baseline_year_1_arm_1') | 0.068 | 2.513E-12 | 11.600 |
| Socioeconomic | ('reshist_addr1_coi_z_ed_nat', 'baseline_year_1_arm_1') | 0.051 | 1.852E-07 | 6.732 |
| Socioeconomic | ('reshist_addr1_coi_z_he_nat', 'baseline_year_1_arm_1') | 0.056 | 8.523E-09 | 8.069 |
| Socioeconomic | ('reshist_addr1_coi_z_se_nat', 'baseline_year_1_arm_1') | 0.069 | 1.069E-12 | 11.971 |
| Socioeconomic | ('rel_relationship', 'baseline_year_1_arm_1')_2.0 | 0.049 | 5.326E-07 | 6.274 |
| Summary | ('pps_y_ss_severity_score', 'baseline_year_1_arm_1') | -0.045 | 3.827E-06 | 5.417 |
| Med History | ('fhx_3hb_p', 'baseline_year_1_arm_1') | -0.044 | 6.173E-06 | 5.210 |
| Task Based | ('lmt_scr_num_correct', 'baseline_year_1_arm_1') | 0.063 | 9.718E-11 | 10.012 |
| Task Based | ('lmt_scr_num_wrong', 'baseline_year_1_arm_1') | -0.049 | 3.778E-07 | 6.423 |
| Task Based | ('tfmri_nb_all_beh_ctotal_nt', 'baseline_year_1_arm_1') | 0.078 | 1.426E-15 | 14.846 |
| Task Based | ('tfmri_nb_all_beh_c2b_nt', 'baseline_year_1_arm_1') | 0.076 | 6.828E-15 | 14.166 |
| Task Based | ('tfmri_nb_r1_beh_c2b_nt', 'baseline_year_1_arm_1') | 0.072 | 1.579E-13 | 12.802 |
| Task Based | ('tfmri_nb_r2_beh_c2b_nt', 'baseline_year_1_arm_1') | 0.077 | 1.692E-15 | 14.772 |
| Task Based | ('tfmri_nb_all_beh_cpf_nt', 'baseline_year_1_arm_1') | 0.078 | 8.593E-16 | 15.066 |
| Task Based | ('tfmri_nb_r1_beh_cpf_nt', 'baseline_year_1_arm_1') | 0.058 | 2.346E-09 | 8.630 |
| Task Based | ('tfmri_nb_r2_beh_cpf_nt', 'baseline_year_1_arm_1') | 0.077 | 2.532E-15 | 14.596 |
| Task Based | ('tfmri_nb_all_beh_c2bpf_nt', 'baseline_year_1_arm_1') | 0.065 | 3.235E-11 | 10.490 |
| Task Based | ('tfmri_nb_r2_beh_c2bpf_nt', 'baseline_year_1_arm_1') | 0.071 | 2.293E-13 | 12.640 |
| Task Based | ('tfmri_nb_all_beh_c2bpfnl_nt', 'baseline_year_1_arm_1') | 0.046 | 2.890E-06 | 5.539 |
| Task Based | ('tfmri_nb_all_beh_cnf_nt', 'baseline_year_1_arm_1') | 0.073 | 4.481E-14 | 13.349 |
| Task Based | ('tfmri_nb_r1_beh_cnf_nt', 'baseline_year_1_arm_1') | 0.063 | 1.080E-10 | 9.967 |
| Task Based | ('tfmri_nb_r2_beh_cnf_nt', 'baseline_year_1_arm_1') | 0.073 | 7.095E-14 | 13.149 |
| Task Based | ('tfmri_nb_all_beh_c2bnf_nt', 'baseline_year_1_arm_1') | 0.074 | 3.008E-14 | 13.522 |
| Task Based | ('tfmri_nb_r1_beh_c2bnf_nt', 'baseline_year_1_arm_1') | 0.057 | 3.850E-09 | 8.415 |
| Task Based | ('tfmri_nb_r2_beh_c2bnf_nt', 'baseline_year_1_arm_1') | 0.065 | 2.874E-11 | 10.542 |
| Task Based | ('tfmri_nb_all_beh_c2bnfnl_nt', 'baseline_year_1_arm_1') | 0.057 | 5.659E-09 | 8.247 |
| Task Based | ('tfmri_nb_all_beh_cngf_nt', 'baseline_year_1_arm_1') | 0.069 | 1.185E-12 | 11.926 |
| Task Based | ('tfmri_nb_r1_beh_cngf_nt', 'baseline_year_1_arm_1') | 0.066 | 1.584E-11 | 10.800 |
| Task Based | ('tfmri_nb_r2_beh_cngf_nt', 'baseline_year_1_arm_1') | 0.062 | 1.402E-10 | 9.853 |
| Task Based | ('tfmri_nb_all_beh_c2bngf_nt', 'baseline_year_1_arm_1') | 0.065 | 2.764E-11 | 10.558 |
| Task Based | ('tfmri_nb_r1_beh_c2bngf_nt', 'baseline_year_1_arm_1') | 0.062 | 1.766E-10 | 9.753 |
| Task Based | ('tfmri_nb_r2_beh_c2bngf_nt', 'baseline_year_1_arm_1') | 0.055 | 1.493E-08 | 7.826 |
| Task Based | ('tfmri_nb_all_beh_cplace_nt', 'baseline_year_1_arm_1') | 0.075 | 1.409E-14 | 13.851 |
| Task Based | ('tfmri_nb_r1_beh_cplace_nt', 'baseline_year_1_arm_1') | 0.060 | 8.785E-10 | 9.056 |
| Task Based | ('tfmri_nb_r2_beh_cplace_nt', 'baseline_year_1_arm_1') | 0.068 | 3.881E-12 | 11.411 |
| Task Based | ('tfmri_nb_all_beh_c2bp_nt', 'baseline_year_1_arm_1') | 0.067 | 7.532E-12 | 11.123 |
| Task Based | ('tfmri_nb_r1_beh_c2bp_nt', 'baseline_year_1_arm_1') | 0.051 | 1.974E-07 | 6.705 |
| Task Based | ('tfmri_nb_r2_beh_c2bp_nt', 'baseline_year_1_arm_1') | 0.062 | 1.452E-10 | 9.838 |
| Task Based | ('tfmri_nb_all_beh_c2bpnl_nt', 'baseline_year_1_arm_1') | 0.051 | 1.464E-07 | 6.835 |
| Task Based | ('tfmri_nb_all_beh_c0b_nt', 'baseline_year_1_arm_1') | 0.072 | 1.247E-13 | 12.904 |
| Task Based | ('tfmri_nb_r1_beh_c0b_nt', 'baseline_year_1_arm_1') | 0.066 | 1.540E-11 | 10.813 |
| Task Based | ('tfmri_nb_r2_beh_c0b_nt', 'baseline_year_1_arm_1') | 0.069 | 1.710E-12 | 11.767 |
| Task Based | ('tfmri_nb_all_beh_c0bpf_nt', 'baseline_year_1_arm_1') | 0.069 | 1.703E-12 | 11.769 |
| Task Based | ('tfmri_nb_r1_beh_c0bpf_nt', 'baseline_year_1_arm_1') | 0.060 | 6.135E-10 | 9.212 |
| Task Based | ('tfmri_nb_r2_beh_c0bpf_nt', 'baseline_year_1_arm_1') | 0.065 | 1.998E-11 | 10.699 |
| Task Based | ('tfmri_nb_all_beh_c0bpfnl_nt', 'baseline_year_1_arm_1') | 0.047 | 1.413E-06 | 5.850 |
| Task Based | ('tfmri_nb_all_beh_c0bnf_nt', 'baseline_year_1_arm_1') | 0.059 | 1.299E-09 | 8.887 |
| Task Based | ('tfmri_nb_r1_beh_c0bnf_nt', 'baseline_year_1_arm_1') | 0.047 | 1.432E-06 | 5.844 |
| Task Based | ('tfmri_nb_r2_beh_c0bnf_nt', 'baseline_year_1_arm_1') | 0.058 | 2.181E-09 | 8.661 |
| Task Based | ('tfmri_nb_all_beh_c0bnfnl_nt', 'baseline_year_1_arm_1') | 0.049 | 5.664E-07 | 6.247 |
| Task Based | ('tfmri_nb_all_beh_c0bngf_nt', 'baseline_year_1_arm_1') | 0.062 | 2.542E-10 | 9.595 |
| Task Based | ('tfmri_nb_r1_beh_c0bngf_nt', 'baseline_year_1_arm_1') | 0.048 | 1.008E-06 | 5.996 |
| Task Based | ('tfmri_nb_r2_beh_c0bngf_nt', 'baseline_year_1_arm_1') | 0.049 | 4.658E-07 | 6.332 |
| Task Based | ('tfmri_nb_all_beh_c0bngfnl_nt', 'baseline_year_1_arm_1') | 0.048 | 6.714E-07 | 6.173 |
| Task Based | ('tfmri_nb_all_beh_c0bp_nt', 'baseline_year_1_arm_1') | 0.059 | 1.171E-09 | 8.931 |
| Task Based | ('tfmri_nb_r1_beh_c0bp_nt', 'baseline_year_1_arm_1') | 0.050 | 2.142E-07 | 6.669 |
| Task Based | ('tfmri_nb_r2_beh_c0bp_nt', 'baseline_year_1_arm_1') | 0.053 | 5.699E-08 | 7.244 |
| Task Based | ('tfmri_nb_all_beh_c0bpnl_nt', 'baseline_year_1_arm_1') | 0.053 | 4.156E-08 | 7.381 |
| Task Based | ('lmt_scr_perc_correct', 'baseline_year_1_arm_1') | 0.058 | 1.956E-09 | 8.709 |
| Task Based | ('lmt_scr_perc_wrong', 'baseline_year_1_arm_1') | -0.049 | 4.211E-07 | 6.376 |
| Task Based | ('tfmri_nb_all_beh_ctotal_rate', 'baseline_year_1_arm_1') | 0.080 | 1.274E-16 | 15.895 |
| Task Based | ('tfmri_nb_all_beh_c2b_rate', 'baseline_year_1_arm_1') | 0.078 | 1.284E-15 | 14.891 |
| Task Based | ('tfmri_nb_r1_beh_c2b_rate', 'baseline_year_1_arm_1') | 0.070 | 8.725E-13 | 12.059 |
| Task Based | ('tfmri_nb_r2_beh_c2b_rate', 'baseline_year_1_arm_1') | 0.073 | 6.785E-14 | 13.168 |
| Task Based | ('tfmri_nb_all_beh_cpf_rate', 'baseline_year_1_arm_1') | 0.079 | 6.361E-16 | 15.196 |
| Task Based | ('tfmri_nb_all_beh_cpf_stdrt', 'baseline_year_1_arm_1') | -0.046 | 2.505E-06 | 5.601 |
| Task Based | ('tfmri_nb_r1_beh_cpf_rate', 'baseline_year_1_arm_1') | 0.058 | 2.189E-09 | 8.660 |
| Task Based | ('tfmri_nb_r2_beh_cpf_rate', 'baseline_year_1_arm_1') | 0.079 | 6.379E-16 | 15.195 |
| Task Based | ('tfmri_nb_all_beh_c2bpf_rate', 'baseline_year_1_arm_1') | 0.064 | 6.262E-11 | 10.203 |
| Task Based | ('tfmri_nb_r2_beh_c2bpf_rate', 'baseline_year_1_arm_1') | 0.068 | 2.374E-12 | 11.624 |
| Task Based | ('tfmri_nb_all_beh_c2bpft_rate', 'baseline_year_1_arm_1') | 0.044 | 6.166E-06 | 5.210 |
| Task Based | ('tfmri_nb_all_beh_c2bpfl_rate', 'baseline_year_1_arm_1') | 0.044 | 5.687E-06 | 5.245 |
| Task Based | ('tfmri_nb_r2_beh_c2bpfl_rate', 'baseline_year_1_arm_1') | 0.055 | 1.576E-08 | 7.802 |
| Task Based | ('tfmri_nb_all_beh_c2bpfnl_rate', 'baseline_year_1_arm_1') | 0.049 | 3.907E-07 | 6.408 |
| Task Based | ('tfmri_nb_r2_beh_c2bpfnl_rate', 'baseline_year_1_arm_1') | 0.055 | 1.916E-08 | 7.718 |
| Task Based | ('tfmri_nb_all_beh_cnf_rate', 'baseline_year_1_arm_1') | 0.074 | 2.648E-14 | 13.577 |
| Task Based | ('tfmri_nb_r1_beh_cnf_rate', 'baseline_year_1_arm_1') | 0.062 | 1.867E-10 | 9.729 |
| Task Based | ('tfmri_nb_r2_beh_cnf_rate', 'baseline_year_1_arm_1') | 0.075 | 1.049E-14 | 13.979 |
| Task Based | ('tfmri_nb_all_beh_c2bnf_rate', 'baseline_year_1_arm_1') | 0.073 | 6.010E-14 | 13.221 |
| Task Based | ('tfmri_nb_r1_beh_c2bnf_rate', 'baseline_year_1_arm_1') | 0.061 | 3.973E-10 | 9.401 |
| Task Based | ('tfmri_nb_r2_beh_c2bnf_rate', 'baseline_year_1_arm_1') | 0.067 | 5.646E-12 | 11.248 |
| Task Based | ('tfmri_nb_all_beh_c2bnfl_rate', 'baseline_year_1_arm_1') | 0.058 | 2.196E-09 | 8.658 |
| Task Based | ('tfmri_nb_r2_beh_c2bnfl_rate', 'baseline_year_1_arm_1') | 0.051 | 1.488E-07 | 6.827 |
| Task Based | ('tfmri_nb_all_beh_c2bnfnl_rate', 'baseline_year_1_arm_1') | 0.061 | 2.963E-10 | 9.528 |
| Task Based | ('tfmri_nb_r1_beh_c2bnfnl_rate', 'baseline_year_1_arm_1') | 0.051 | 2.024E-07 | 6.694 |
| Task Based | ('tfmri_nb_r2_beh_c2bnfnl_rate', 'baseline_year_1_arm_1') | 0.049 | 4.035E-07 | 6.394 |
| Task Based | ('tfmri_nb_all_beh_cngf_rate', 'baseline_year_1_arm_1') | 0.071 | 3.783E-13 | 12.422 |
| Task Based | ('tfmri_nb_r1_beh_cngf_rate', 'baseline_year_1_arm_1') | 0.067 | 5.398E-12 | 11.268 |
| Task Based | ('tfmri_nb_r2_beh_cngf_rate', 'baseline_year_1_arm_1') | 0.062 | 1.319E-10 | 9.880 |
| Task Based | ('tfmri_nb_all_beh_c2bngf_rate', 'baseline_year_1_arm_1') | 0.067 | 4.095E-12 | 11.388 |
| Task Based | ('tfmri_nb_r1_beh_c2bngf_rate', 'baseline_year_1_arm_1') | 0.062 | 1.849E-10 | 9.733 |
| Task Based | ('tfmri_nb_r2_beh_c2bngf_rate', 'baseline_year_1_arm_1') | 0.052 | 1.077E-07 | 6.968 |
| Task Based | ('tfmri_nb_all_beh_c2bngft_rate', 'baseline_year_1_arm_1') | 0.053 | 6.344E-08 | 7.198 |
| Task Based | ('tfmri_nb_all_beh_c2bngfl_rate', 'baseline_year_1_arm_1') | 0.054 | 3.350E-08 | 7.475 |
| Task Based | ('tfmri_nb_r2_beh_c2bngfl_rate', 'baseline_year_1_arm_1') | 0.044 | 6.192E-06 | 5.208 |
| Task Based | ('tfmri_nb_all_beh_c2bngfnl_rate', 'baseline_year_1_arm_1') | 0.045 | 4.679E-06 | 5.330 |
| Task Based | ('tfmri_nb_r1_beh_c2bngfnl_rate', 'baseline_year_1_arm_1') | 0.046 | 2.357E-06 | 5.628 |
| Task Based | ('tfmri_nb_all_beh_cplace_rate', 'baseline_year_1_arm_1') | 0.073 | 7.281E-14 | 13.138 |
| Task Based | ('tfmri_nb_r1_beh_cplace_rate', 'baseline_year_1_arm_1') | 0.060 | 7.500E-10 | 9.125 |
| Task Based | ('tfmri_nb_r2_beh_cplace_rate', 'baseline_year_1_arm_1') | 0.064 | 4.967E-11 | 10.304 |
| Task Based | ('tfmri_nb_all_beh_c2bp_rate', 'baseline_year_1_arm_1') | 0.064 | 6.131E-11 | 10.212 |
| Task Based | ('tfmri_nb_r1_beh_c2bp_rate', 'baseline_year_1_arm_1') | 0.047 | 1.446E-06 | 5.840 |
| Task Based | ('tfmri_nb_r2_beh_c2bp_rate', 'baseline_year_1_arm_1') | 0.059 | 1.119E-09 | 8.951 |
| Task Based | ('tfmri_nb_all_beh_c2bpl_rate', 'baseline_year_1_arm_1') | 0.054 | 2.605E-08 | 7.584 |
| Task Based | ('tfmri_nb_r2_beh_c2bpl_rate', 'baseline_year_1_arm_1') | 0.046 | 2.264E-06 | 5.645 |
| Task Based | ('tfmri_nb_all_beh_c2bpnl_rate', 'baseline_year_1_arm_1') | 0.051 | 1.236E-07 | 6.908 |
| Task Based | ('tfmri_nb_r2_beh_c2bpnl_rate', 'baseline_year_1_arm_1') | 0.044 | 5.225E-06 | 5.282 |
| Task Based | ('tfmri_nb_all_beh_c0b_rate', 'baseline_year_1_arm_1') | 0.073 | 7.458E-14 | 13.127 |
| Task Based | ('tfmri_nb_all_beh_c0b_stdrt', 'baseline_year_1_arm_1') | -0.063 | 7.465E-11 | 10.127 |
| Task Based | ('tfmri_nb_r1_beh_c0b_rate', 'baseline_year_1_arm_1') | 0.065 | 2.452E-11 | 10.610 |
| Task Based | ('tfmri_nb_r1_beh_c0b_stdrt', 'baseline_year_1_arm_1') | -0.052 | 8.036E-08 | 7.095 |
| Task Based | ('tfmri_nb_r2_beh_c0b_rate', 'baseline_year_1_arm_1') | 0.073 | 8.281E-14 | 13.082 |
| Task Based | ('tfmri_nb_r2_beh_c0b_mrt', 'baseline_year_1_arm_1') | -0.047 | 1.746E-06 | 5.758 |
| Task Based | ('tfmri_nb_r2_beh_c0b_stdrt', 'baseline_year_1_arm_1') | -0.062 | 1.531E-10 | 9.815 |
| Task Based | ('tfmri_nb_all_beh_c0bpf_rate', 'baseline_year_1_arm_1') | 0.070 | 6.473E-13 | 12.189 |
| Task Based | ('tfmri_nb_all_beh_c0bpf_stdrt', 'baseline_year_1_arm_1') | -0.050 | 3.621E-07 | 6.441 |
| Task Based | ('tfmri_nb_r1_beh_c0bpf_rate', 'baseline_year_1_arm_1') | 0.059 | 1.395E-09 | 8.855 |
| Task Based | ('tfmri_nb_r2_beh_c0bpf_rate', 'baseline_year_1_arm_1') | 0.064 | 3.635E-11 | 10.440 |
| Task Based | ('tfmri_nb_all_beh_c0bpft_rate', 'baseline_year_1_arm_1') | 0.054 | 3.791E-08 | 7.421 |
| Task Based | ('tfmri_nb_all_beh_c0bpfl_rate', 'baseline_year_1_arm_1') | 0.069 | 9.153E-13 | 12.038 |
| Task Based | ('tfmri_nb_r1_beh_c0bpfl_rate', 'baseline_year_1_arm_1') | 0.059 | 1.244E-09 | 8.905 |
| Task Based | ('tfmri_nb_r2_beh_c0bpfl_rate', 'baseline_year_1_arm_1') | 0.065 | 1.705E-11 | 10.768 |
| Task Based | ('tfmri_nb_all_beh_c0bpfnl_rate', 'baseline_year_1_arm_1') | 0.050 | 3.344E-07 | 6.476 |
| Task Based | ('tfmri_nb_all_beh_c0bnf_rate', 'baseline_year_1_arm_1') | 0.060 | 8.625E-10 | 9.064 |
| Task Based | ('tfmri_nb_all_beh_c0bnf_mrt', 'baseline_year_1_arm_1') | -0.044 | 5.779E-06 | 5.238 |
| Task Based | ('tfmri_nb_all_beh_c0bnf_stdrt', 'baseline_year_1_arm_1') | -0.045 | 4.192E-06 | 5.378 |
| Task Based | ('tfmri_nb_r1_beh_c0bnf_rate', 'baseline_year_1_arm_1') | 0.049 | 5.741E-07 | 6.241 |
| Task Based | ('tfmri_nb_r2_beh_c0bnf_rate', 'baseline_year_1_arm_1') | 0.058 | 1.865E-09 | 8.729 |
| Task Based | ('tfmri_nb_r2_beh_c0bnf_mrt', 'baseline_year_1_arm_1') | -0.044 | 6.746E-06 | 5.171 |
| Task Based | ('tfmri_nb_all_beh_c0bnft_rate', 'baseline_year_1_arm_1') | 0.044 | 6.017E-06 | 5.221 |
| Task Based | ('tfmri_nb_all_beh_c0bnfl_rate', 'baseline_year_1_arm_1') | 0.055 | 1.951E-08 | 7.710 |
| Task Based | ('tfmri_nb_r2_beh_c0bnfl_rate', 'baseline_year_1_arm_1') | 0.058 | 2.543E-09 | 8.595 |
| Task Based | ('tfmri_nb_all_beh_c0bnfnl_rate', 'baseline_year_1_arm_1') | 0.044 | 7.392E-06 | 5.131 |
| Task Based | ('tfmri_nb_all_beh_c0bngf_rate', 'baseline_year_1_arm_1') | 0.057 | 3.700E-09 | 8.432 |
| Task Based | ('tfmri_nb_r1_beh_c0bngf_rate', 'baseline_year_1_arm_1') | 0.047 | 1.118E-06 | 5.952 |
| Task Based | ('tfmri_nb_r2_beh_c0bngf_rate', 'baseline_year_1_arm_1') | 0.051 | 1.732E-07 | 6.761 |
| Task Based | ('tfmri_nb_all_beh_c0bngfl_rate', 'baseline_year_1_arm_1') | 0.053 | 3.890E-08 | 7.410 |
| Task Based | ('tfmri_nb_r2_beh_c0bngfl_rate', 'baseline_year_1_arm_1') | 0.044 | 5.597E-06 | 5.252 |
| Task Based | ('tfmri_nb_all_beh_c0bngfnl_rate', 'baseline_year_1_arm_1') | 0.049 | 4.428E-07 | 6.354 |
| Task Based | ('tfmri_nb_all_beh_c0bp_rate', 'baseline_year_1_arm_1') | 0.060 | 8.998E-10 | 9.046 |
| Task Based | ('tfmri_nb_r1_beh_c0bp_rate', 'baseline_year_1_arm_1') | 0.050 | 2.189E-07 | 6.660 |
| Task Based | ('tfmri_nb_r2_beh_c0bp_rate', 'baseline_year_1_arm_1') | 0.051 | 1.331E-07 | 6.876 |
| Task Based | ('tfmri_nb_all_beh_c0bpt_rate', 'baseline_year_1_arm_1') | 0.050 | 2.373E-07 | 6.625 |
| Task Based | ('tfmri_nb_r1_beh_c0bpt_rate', 'baseline_year_1_arm_1') | 0.044 | 5.306E-06 | 5.275 |
| Task Based | ('tfmri_nb_all_beh_c0bpl_rate', 'baseline_year_1_arm_1') | 0.046 | 1.783E-06 | 5.749 |
| Task Based | ('tfmri_nb_all_beh_c0bpnl_rate', 'baseline_year_1_arm_1') | 0.049 | 4.733E-07 | 6.325 |
| Task Based | ('tfmri_nb_r2_beh_c0bpnl_rate', 'baseline_year_1_arm_1') | 0.045 | 3.580E-06 | 5.446 |
| Task Based | ('tfmri_nback_beh_performflag', 'baseline_year_1_arm_1')_0.0 | -0.056 | 7.941E-09 | 8.100 |
| Task Based | ('tfmri_nback_beh_performflag', 'baseline_year_1_arm_1')_1.0 | 0.056 | 7.941E-09 | 8.100 |
| Task Based | ('lmt_scr_correct_num_stimtype3', 'baseline_year_1_arm_1')_0.0 | -0.050 | 2.638E-07 | 6.579 |
| Task Based | ('lmt_scr_correct_num_stimtype4', 'baseline_year_1_arm_1')_0.0 | -0.056 | 8.662E-09 | 8.062 |
| Task Based | ('lmt_scr_correct_num_stimtype4', 'baseline_year_1_arm_1')_4.0 | 0.047 | 1.123E-06 | 5.950 |
| Task Based | ('lmt_scr_wrong_num_stimtype3', 'baseline_year_1_arm_1')_0.0 | 0.051 | 1.882E-07 | 6.725 |
| Task Based | ('lmt_scr_wrong_num_stimtype3', 'baseline_year_1_arm_1')_3.0 | -0.050 | 2.593E-07 | 6.586 |
| Task Based | ('lmt_scr_wrong_num_stimtype4', 'baseline_year_1_arm_1')_0.0 | 0.045 | 4.078E-06 | 5.390 |
| Task Based | ('lmt_scr_wrong_num_stimtype4', 'baseline_year_1_arm_1')_3.0 | -0.048 | 8.998E-07 | 6.046 |
| Task Based | ('tfmri_nb_r2_beh_c2bpfl_nt', 'baseline_year_1_arm_1')_2.0 | 0.059 | 1.617E-09 | 8.791 |
| Task Based | ('tfmri_nb_all_beh_c2bnfl_nt', 'baseline_year_1_arm_1')_4.0 | 0.049 | 3.750E-07 | 6.426 |
| Task Based | ('tfmri_nb_r1_beh_c2bnfl_nt', 'baseline_year_1_arm_1')_2.0 | 0.047 | 1.161E-06 | 5.935 |
| Task Based | ('tfmri_nb_r2_beh_c2bnfl_nt', 'baseline_year_1_arm_1')_2.0 | 0.051 | 1.632E-07 | 6.787 |
| Task Based | ('tfmri_nb_r1_beh_c2bnfnl_nt', 'baseline_year_1_arm_1')_6.0 | 0.052 | 1.040E-07 | 6.983 |
| Task Based | ('tfmri_nb_r1_beh_c2bngfnl_nt', 'baseline_year_1_arm_1')_3.0 | -0.045 | 3.929E-06 | 5.406 |
| Task Based | ('tfmri_nb_r2_beh_c2bpl_nt', 'baseline_year_1_arm_1')_2.0 | 0.048 | 7.695E-07 | 6.114 |
| Task Based | ('tfmri_nb_all_beh_c0bpfl_nt', 'baseline_year_1_arm_1')_6.0 | 0.074 | 2.828E-14 | 13.548 |
| Task Based | ('tfmri_nb_r1_beh_c0bpfl_nt', 'baseline_year_1_arm_1')_3.0 | 0.056 | 6.502E-09 | 8.187 |
| Task Based | ('tfmri_nb_r2_beh_c0bpfl_nt', 'baseline_year_1_arm_1')_1.0 | -0.046 | 2.438E-06 | 5.613 |
| Task Based | ('tfmri_nb_r2_beh_c0bpfl_nt', 'baseline_year_1_arm_1')_3.0 | 0.068 | 2.783E-12 | 11.556 |
| Task Based | ('tfmri_nb_r1_beh_c0bnft_nt', 'baseline_year_1_arm_1')_2.0 | 0.044 | 7.067E-06 | 5.151 |
| Task Based | ('tfmri_nb_r2_beh_c0bnfl_nt', 'baseline_year_1_arm_1')_3.0 | 0.053 | 6.730E-08 | 7.172 |
| Task Based | ('tfmri_nb_r2_beh_c0bngfnl_nt', 'baseline_year_1_arm_1')_5.0 | 0.044 | 5.991E-06 | 5.223 |
| Task Based | ('tfmri_nb_all_beh_c0bpt_nt', 'baseline_year_1_arm_1')_4.0 | 0.052 | 8.722E-08 | 7.059 |
| Task Based | ('tfmri_nb_r1_beh_c0bpt_nt', 'baseline_year_1_arm_1')_2.0 | 0.049 | 4.890E-07 | 6.311 |
| Task Based | ('tfmri_nb_r1_beh_c0bpl_nt', 'baseline_year_1_arm_1')_1.0 | -0.046 | 2.770E-06 | 5.557 |
| Cognitive | ('pea_ravlt_sd_trial_ii_tc', 'baseline_year_1_arm_1') | 0.047 | 1.223E-06 | 5.913 |
| Cognitive | ('pea_ravlt_sd_trial_iii_tc', 'baseline_year_1_arm_1') | 0.045 | 4.443E-06 | 5.352 |
| Cognitive | ('pea_ravlt_sd_trial_iv_tc', 'baseline_year_1_arm_1') | 0.049 | 3.690E-07 | 6.433 |
| Cognitive | ('pea_ravlt_sd_trial_v_tc', 'baseline_year_1_arm_1') | 0.054 | 2.643E-08 | 7.578 |
| Cognitive | ('pea_ravlt_sd_trial_vi_tc', 'baseline_year_1_arm_1') | 0.046 | 2.100E-06 | 5.678 |
| Cognitive | ('pea_ravlt_ld_trial_vii_tc', 'baseline_year_1_arm_1') | 0.047 | 1.178E-06 | 5.929 |
| Cognitive | ('pea_wiscv_trs', 'baseline_year_1_arm_1') | 0.061 | 2.605E-10 | 9.584 |
| Cognitive | ('pea_wiscv_tss', 'baseline_year_1_arm_1') | 0.046 | 1.853E-06 | 5.732 |
| Cognitive | ('nihtbx_flanker_agecorrected', 'baseline_year_1_arm_1')_78.0 | -0.043 | 8.480E-06 | 5.072 |
| Cognitive | ('nihtbx_flanker_agecorrected', 'baseline_year_1_arm_1')_92.0 | 0.055 | 1.568E-08 | 7.805 |
| Cognitive | ('nihtbx_cardsort_agecorrected', 'baseline_year_1_arm_1')_81.0 | -0.057 | 4.096E-09 | 8.388 |
| Cognitive | ('nihtbx_picture_agecorrected', 'baseline_year_1_arm_1')_88.0 | -0.047 | 1.605E-06 | 5.794 |
| Behavior | ('cbcl_q53_p', 'baseline_year_1_arm_1')_0.0 | 0.062 | 2.484E-10 | 9.605 |
| Behavior | ('cbcl_q53_p', 'baseline_year_1_arm_1')_1.0 | -0.049 | 4.131E-07 | 6.384 |
| Behavior | ('cbcl_q55_p', 'baseline_year_1_arm_1')_0.0 | 0.070 | 5.951E-13 | 12.225 |
| Behavior | ('cbcl_q55_p', 'baseline_year_1_arm_1')_1.0 | -0.050 | 2.285E-07 | 6.641 |
| Behavior | ('cbcl_q55_p', 'baseline_year_1_arm_1')_2.0 | -0.048 | 8.812E-07 | 6.055 |
| Activity | ('sai_p_activities___1', 'baseline_year_1_arm_1')_0.0 | -0.046 | 1.826E-06 | 5.738 |
| Activity | ('sai_p_activities___1', 'baseline_year_1_arm_1')_1.0 | 0.046 | 1.826E-06 | 5.738 |
| Activity | ('sai_p_activities___15', 'baseline_year_1_arm_1')_0.0 | -0.053 | 3.900E-08 | 7.409 |
| Activity | ('sai_p_activities___15', 'baseline_year_1_arm_1')_1.0 | 0.053 | 3.900E-08 | 7.409 |
| Activity | ('sai_ss_base_nyr_p', 'baseline_year_1_arm_1')_0.0 | -0.049 | 5.971E-07 | 6.224 |
| Activity | ('sai_ss_base_nmonth_p', 'baseline_year_1_arm_1')_0.0 | -0.048 | 6.360E-07 | 6.197 |
| Activity | ('sai_ss_base_nmonth_p', 'baseline_year_1_arm_1')_4.0 | 0.050 | 2.440E-07 | 6.613 |
| Activity | ('sai_ss_base_perwk_p', 'baseline_year_1_arm_1')_0.0 | -0.048 | 9.302E-07 | 6.031 |
| Activity | ('sai_ss_base_tspent_p', 'baseline_year_1_arm_1')_0.0 | -0.048 | 6.819E-07 | 6.166 |
| Activity | ('sai_ss_soc_nyr_p', 'baseline_year_1_arm_1')_0.0 | -0.054 | 2.251E-08 | 7.648 |
| Activity | ('sai_ss_soc_nmonth_p', 'baseline_year_1_arm_1')_0.0 | -0.054 | 3.335E-08 | 7.477 |
| Activity | ('sai_ss_soc_perwk_p', 'baseline_year_1_arm_1')_0.0 | -0.053 | 4.085E-08 | 7.389 |
| Activity | ('sai_ss_soc_tspent_p', 'baseline_year_1_arm_1')_0.0 | -0.055 | 1.875E-08 | 7.727 |
| Social Adjustment | ('kbi_p_c_school_setting', 'baseline_year_1_arm_1')_3.0 | 0.044 | 6.610E-06 | 5.180 |
| Social Adjustment | ('kbi_p_how_well_c_school', 'baseline_year_1_arm_1')_1.0 | 0.044 | 6.287E-06 | 5.202 |
| Social Adjustment | ('mex_american10_p', 'baseline_year_1_arm_1')_5.0 | -0.045 | 4.783E-06 | 5.320 |
| Social Adjustment | ('meim_ethnic_id_p', 'baseline_year_1_arm_1')_1.0 | 0.083 | 8.795E-18 | 17.056 |
| Social Adjustment | ('meim_ethnic_id_p', 'baseline_year_1_arm_1')_5.0 | -0.075 | 1.432E-14 | 13.844 |
| Substance Use | ('tlfb_age_calc_inmonths', 'baseline_year_1_arm_1') | 0.087 | 4.360E-19 | 18.361 |
| Substance Use | ('tlfb_tob', 'baseline_year_1_arm_1')_0.0 | -0.043 | 8.469E-06 | 5.072 |
| Substance Use | ('tlfb_tob', 'baseline_year_1_arm_1')_1.0 | 0.043 | 8.469E-06 | 5.072 |
| Substance Use | ('tlfb_age', 'baseline_year_1_arm_1')_9.0 | -0.082 | 4.679E-17 | 16.330 |
| Substance Use | ('tlfb_age', 'baseline_year_1_arm_1')_10.0 | 0.082 | 3.209E-17 | 16.494 |
| Personality | ('upps28_y', 'baseline_year_1_arm_1')_1.0 | -0.044 | 5.508E-06 | 5.259 |
| Personality | ('upps36_y', 'baseline_year_1_arm_1')_4.0 | -0.047 | 1.301E-06 | 5.886 |
| Personality | ('upps39_y', 'baseline_year_1_arm_1')_4.0 | -0.044 | 6.699E-06 | 5.174 |
| Questionnaire | ('postscan_excited_1', 'baseline_year_1_arm_1')_5.0 | -0.043 | 8.105E-06 | 5.091 |
| Questionnaire | ('scrn_twin_reg___2', 'screener_arm_1')_0.0 | -0.046 | 2.569E-06 | 5.590 |
| Questionnaire | ('scrn_twin_reg___2', 'screener_arm_1')_1.0 | 0.046 | 2.569E-06 | 5.590 |
| Questionnaire | ('bisbas3_y', 'baseline_year_1_arm_1')_1.0 | 0.046 | 2.167E-06 | 5.664 |
| Questionnaire | ('screen7_wknd_y', 'baseline_year_1_arm_1')_4.0 | -0.048 | 7.105E-07 | 6.148 |
| Diagnostic | ('ksads_1_188_p', 'baseline_year_1_arm_1')_0.0 | -0.044 | 7.343E-06 | 5.134 |
| Diagnostic | ('ksads_1_188_p', 'baseline_year_1_arm_1')_1.0 | 0.044 | 7.343E-06 | 5.134 |
| Diagnostic | ('ksads_13_74_p', 'baseline_year_1_arm_1')_0.0 | 0.051 | 1.678E-07 | 6.775 |
| Diagnostic | ('ksads_13_74_p', 'baseline_year_1_arm_1')_1.0 | -0.051 | 1.678E-07 | 6.775 |
| **Subtype 2** | | | | |
| **cat_id** | **phe_name** | **r_value** | **p_value** | **-logp_value** |
| Demographics | ('sex_official', '')_F | 0.150 | 2.331E-54 | 53.632 |
| Demographics | ('sex_official', '')_M | -0.150 | 2.331E-54 | 53.632 |
| Demographics | ('interview_age', 'baseline_year_1_arm_1') | -0.072 | 1.216E-13 | 12.915 |
| Demographics | ('interview_age', 'screener_arm_1') | -0.072 | 1.216E-13 | 12.915 |
| Demographics | ('demo_brthdat_v2', 'baseline_year_1_arm_1') | -0.059 | 1.414E-09 | 8.850 |
| Demographics | ('demo_sex_v2', 'baseline_year_1_arm_1')_1.0 | -0.150 | 1.752E-54 | 53.756 |
| Demographics | ('demo_sex_v2', 'baseline_year_1_arm_1')_2.0 | 0.150 | 2.998E-54 | 53.523 |
| Demographics | ('demo_gender_id_v2', 'baseline_year_1_arm_1')_1.0 | -0.149 | 2.899E-53 | 52.538 |
| Demographics | ('demo_gender_id_v2', 'baseline_year_1_arm_1')_2.0 | 0.149 | 1.641E-53 | 52.785 |
| Socioeconomic | ('acs_raked_propensity_score', 'baseline_year_1_arm_1') | -0.045 | 4.331E-06 | 5.363 |
| Socioeconomic | ('genetic_af_american', 'baseline_year_1_arm_1') | -0.063 | 7.345E-11 | 10.134 |
| Med History | ('stq_y_ss_weekend', 'baseline_year_1_arm_1') | -0.047 | 1.148E-06 | 5.940 |
| Med History | ('medhx_2a', 'baseline_year_1_arm_1')_0.0 | 0.048 | 8.013E-07 | 6.096 |
| Med History | ('medhx_2a', 'baseline_year_1_arm_1')_1.0 | -0.048 | 8.013E-07 | 6.096 |
| Task Based | ('tfmri_nb_all_beh_c2bpt_mrt', 'baseline_year_1_arm_1') | 0.044 | 5.470E-06 | 5.262 |
| Cognitive | ('pea_wiscv_tss', 'baseline_year_1_arm_1') | 0.046 | 1.856E-06 | 5.731 |
| Behavior | ('cbcl_scr_syn_withdep_t', 'baseline_year_1_arm_1') | -0.046 | 1.906E-06 | 5.720 |
| Behavior | ('cbcl_scr_syn_attention_r', 'baseline_year_1_arm_1') | -0.052 | 7.010E-08 | 7.154 |
| Behavior | ('cbcl_scr_dsm5_adhd_r', 'baseline_year_1_arm_1') | -0.055 | 1.633E-08 | 7.787 |
| Behavior | ('cbcl_q08_p', 'baseline_year_1_arm_1')_0.0 | 0.055 | 1.281E-08 | 7.893 |
| Behavior | ('cbcl_q08_p', 'baseline_year_1_arm_1')_2.0 | -0.049 | 3.675E-07 | 6.435 |
| Behavior | ('cbcl_q10_p', 'baseline_year_1_arm_1')_0.0 | 0.056 | 9.345E-09 | 8.029 |
| Behavior | ('cbcl_q61_p', 'baseline_year_1_arm_1')_0.0 | 0.044 | 5.032E-06 | 5.298 |
| Behavior | ('cbcl_q78_p', 'baseline_year_1_arm_1')_0.0 | 0.047 | 1.468E-06 | 5.833 |
| Activity | ('sai_p_activities___0', 'baseline_year_1_arm_1')_0.0 | -0.076 | 3.987E-15 | 14.399 |
| Activity | ('sai_p_activities___0', 'baseline_year_1_arm_1')_1.0 | 0.076 | 3.987E-15 | 14.399 |
| Activity | ('sai_p_activities___6', 'baseline_year_1_arm_1')_0.0 | -0.065 | 2.001E-11 | 10.699 |
| Activity | ('sai_p_activities___6', 'baseline_year_1_arm_1')_1.0 | 0.065 | 2.001E-11 | 10.699 |
| Activity | ('sai_p_activities___23', 'baseline_year_1_arm_1')_0.0 | -0.056 | 9.139E-09 | 8.039 |
| Activity | ('sai_p_activities___23', 'baseline_year_1_arm_1')_1.0 | 0.056 | 9.139E-09 | 8.039 |
| Activity | ('sai_ss_dance_nyr_p', 'baseline_year_1_arm_1')_0.0 | -0.078 | 7.460E-16 | 15.127 |
| Activity | ('sai_ss_dance_nyr_p', 'baseline_year_1_arm_1')_1.0 | 0.044 | 5.885E-06 | 5.230 |
| Activity | ('sai_ss_dance_nmonth_p', 'baseline_year_1_arm_1')_0.0 | -0.076 | 5.286E-15 | 14.277 |
| Activity | ('sai_ss_dance_nmonth_p', 'baseline_year_1_arm_1')_9.0 | 0.050 | 2.396E-07 | 6.621 |
| Activity | ('sai_ss_dance_perwk_p', 'baseline_year_1_arm_1')_0.0 | -0.077 | 3.524E-15 | 14.453 |
| Activity | ('sai_ss_dance_perwk_p', 'baseline_year_1_arm_1')_1.0 | 0.063 | 1.055E-10 | 9.977 |
| Activity | ('sai_ss_dance_tspent_p', 'baseline_year_1_arm_1')_0.0 | -0.077 | 1.993E-15 | 14.700 |
| Activity | ('sai_ss_dance_tspent_p', 'baseline_year_1_arm_1')_4.0 | 0.055 | 1.912E-08 | 7.718 |
| Activity | ('sai_ss_gym_nyr_p', 'baseline_year_1_arm_1')_0.0 | -0.065 | 1.713E-11 | 10.766 |
| Activity | ('sai_ss_gym_nmonth_p', 'baseline_year_1_arm_1')_0.0 | -0.066 | 1.017E-11 | 10.993 |
| Activity | ('sai_ss_gym_perwk_p', 'baseline_year_1_arm_1')_0.0 | -0.066 | 1.056E-11 | 10.976 |
| Activity | ('sai_ss_gym_perwk_p', 'baseline_year_1_arm_1')_1.0 | 0.068 | 3.792E-12 | 11.421 |
| Activity | ('sai_ss_gym_tspent_p', 'baseline_year_1_arm_1')_0.0 | -0.065 | 3.111E-11 | 10.507 |
| Activity | ('sai_ss_gym_tspent_p', 'baseline_year_1_arm_1')_4.0 | 0.049 | 3.821E-07 | 6.418 |
| Activity | ('sai_ss_music_nyr_p', 'baseline_year_1_arm_1')_0.0 | -0.059 | 1.115E-09 | 8.953 |
| Activity | ('sai_ss_music_nmonth_p', 'baseline_year_1_arm_1')_0.0 | -0.056 | 7.797E-09 | 8.108 |
| Activity | ('sai_ss_music_perwk_p', 'baseline_year_1_arm_1')_0.0 | -0.055 | 2.003E-08 | 7.698 |
| Activity | ('sai_ss_music_perwk_p', 'baseline_year_1_arm_1')_1.0 | 0.045 | 3.411E-06 | 5.467 |
| Activity | ('sai_ss_music_tspent_p', 'baseline_year_1_arm_1')_0.0 | -0.056 | 9.659E-09 | 8.015 |
| Social Adjustment | ('kbi_p_how_well_c_school', 'baseline_year_1_arm_1')_1.0 | 0.065 | 3.260E-11 | 10.487 |
| Social Adjustment | ('kbi_p_how_well_c_school', 'baseline_year_1_arm_1')_2.0 | -0.050 | 3.127E-07 | 6.505 |
| Social Adjustment | ('kbi_p_grades_in_school', 'baseline_year_1_arm_1')_1.0 | 0.058 | 3.295E-09 | 8.482 |
| Social Adjustment | ('kbi_p_c_spec_serv___4', 'baseline_year_1_arm_1')_0.0 | 0.046 | 2.813E-06 | 5.551 |
| Social Adjustment | ('kbi_p_c_spec_serv___4', 'baseline_year_1_arm_1')_1.0 | -0.046 | 2.813E-06 | 5.551 |
| Substance Use | ('tlfb_age_calc_inmonths', 'baseline_year_1_arm_1') | -0.069 | 1.212E-12 | 11.917 |
| Substance Use | ('hair_status_y', 'baseline_year_1_arm_1')_5.0 | -0.047 | 1.167E-06 | 5.933 |
| Substance Use | ('tlfb_age', 'baseline_year_1_arm_1')_9.0 | 0.054 | 3.701E-08 | 7.432 |
| Substance Use | ('tlfb_age', 'baseline_year_1_arm_1')_10.0 | -0.052 | 7.184E-08 | 7.144 |
| Phys Characteristics | ('pds_sex_y', 'baseline_year_1_arm_1')_1.0 | -0.151 | 4.793E-55 | 54.319 |
| Phys Characteristics | ('pds_sex_y', 'baseline_year_1_arm_1')_2.0 | 0.151 | 4.793E-55 | 54.319 |
| Questionnaire | ('screen13_y', 'baseline_year_1_arm_1')_0.0 | 0.063 | 7.603E-11 | 10.119 |
| Questionnaire | ('scrn_hr_disobey', 'screener_arm_1')_0.0 | 0.049 | 3.780E-07 | 6.423 |
| Questionnaire | ('scrn_commondx', 'screener_arm_1')_0.0 | 0.047 | 1.096E-06 | 5.960 |
| Questionnaire | ('scrn_commondx', 'screener_arm_1')_1.0 | -0.047 | 1.096E-06 | 5.960 |
| Diagnostic | ('ksads_14_414_p', 'baseline_year_1_arm_1')_0.0 | 0.053 | 4.954E-08 | 7.305 |
| Diagnostic | ('ksads_14_414_p', 'baseline_year_1_arm_1')_1.0 | -0.053 | 4.954E-08 | 7.305 |
| Diagnostic | ('ksads_14_419_p', 'baseline_year_1_arm_1')_0.0 | 0.047 | 1.280E-06 | 5.893 |
| Diagnostic | ('ksads_14_419_p', 'baseline_year_1_arm_1')_1.0 | -0.047 | 1.280E-06 | 5.893 |
| Diagnostic | ('ksads_14_422_p', 'baseline_year_1_arm_1')_0.0 | 0.045 | 4.585E-06 | 5.339 |
| Diagnostic | ('ksads_14_422_p', 'baseline_year_1_arm_1')_1.0 | -0.045 | 4.585E-06 | 5.339 |
| Diagnostic | ('ksads_14_413_p', 'baseline_year_1_arm_1')_0.0 | 0.058 | 3.325E-09 | 8.478 |
| Diagnostic | ('ksads_14_413_p', 'baseline_year_1_arm_1')_1.0 | -0.058 | 3.325E-09 | 8.478 |
| Diagnostic | ('ksads_14_420_p', 'baseline_year_1_arm_1')_0.0 | 0.045 | 3.100E-06 | 5.509 |
| Diagnostic | ('ksads_14_420_p', 'baseline_year_1_arm_1')_1.0 | -0.045 | 3.100E-06 | 5.509 |
| Diagnostic | ('ksads_14_87_p', 'baseline_year_1_arm_1')_0.0 | 0.045 | 3.471E-06 | 5.460 |
| Diagnostic | ('ksads_14_87_p', 'baseline_year_1_arm_1')_1.0 | -0.045 | 3.471E-06 | 5.460 |
| Diagnostic | ('ksads_14_86_p', 'baseline_year_1_arm_1')_0.0 | 0.044 | 5.233E-06 | 5.281 |
| Diagnostic | ('ksads_14_86_p', 'baseline_year_1_arm_1')_1.0 | -0.044 | 5.233E-06 | 5.281 |
| Diagnostic | ('ksads_14_412_p', 'baseline_year_1_arm_1')_0.0 | 0.048 | 9.031E-07 | 6.044 |
| Diagnostic | ('ksads_14_412_p', 'baseline_year_1_arm_1')_1.0 | -0.048 | 9.031E-07 | 6.044 |
| Diagnostic | ('ksads_14_417_p', 'baseline_year_1_arm_1')_0.0 | 0.055 | 1.980E-08 | 7.703 |
| Diagnostic | ('ksads_14_417_p', 'baseline_year_1_arm_1')_1.0 | -0.055 | 1.980E-08 | 7.703 |
| Diagnostic | ('ksads_14_82_p', 'baseline_year_1_arm_1')_0.0 | 0.047 | 1.205E-06 | 5.919 |
| Diagnostic | ('ksads_14_82_p', 'baseline_year_1_arm_1')_1.0 | -0.047 | 1.205E-06 | 5.919 |
| Diagnostic | ('ksads_14_83_p', 'baseline_year_1_arm_1')_0.0 | 0.046 | 2.349E-06 | 5.629 |
| Diagnostic | ('ksads_14_83_p', 'baseline_year_1_arm_1')_1.0 | -0.046 | 2.349E-06 | 5.629 |
| Diagnostic | ('ksads_14_411_p', 'baseline_year_1_arm_1')_0.0 | 0.050 | 3.430E-07 | 6.465 |
| Diagnostic | ('ksads_14_411_p', 'baseline_year_1_arm_1')_1.0 | -0.050 | 3.430E-07 | 6.465 |
| Diagnostic | ('ksads_14_425_p', 'baseline_year_1_arm_1')_0.0 | 0.047 | 1.112E-06 | 5.954 |
| Diagnostic | ('ksads_14_425_p', 'baseline_year_1_arm_1')_1.0 | -0.047 | 1.112E-06 | 5.954 |
| **Subtype 3** | | | | |
| **cat_id** | **phe_name** | **r_value** | **p_value** | **-logp_value** |
| Demographics | ('interview_age', 'baseline_year_1_arm_1') | -0.100 | 6.456E-25 | 24.190 |
| Demographics | ('interview_age', 'screener_arm_1') | -0.100 | 6.456E-25 | 24.190 |
| Demographics | ('demo_brthdat_v2', 'baseline_year_1_arm_1') | -0.083 | 1.784E-17 | 16.749 |
| Demographics | ('demo_ed_v2', 'baseline_year_1_arm_1')_3.0 | 0.063 | 8.052E-11 | 10.094 |
| Demographics | ('demo_ed_v2', 'baseline_year_1_arm_1')_5.0 | -0.076 | 5.822E-15 | 14.235 |
| Demographics | ('demo_race_a_p___11', 'baseline_year_1_arm_1')_0.0 | 0.073 | 6.650E-14 | 13.177 |
| Demographics | ('demo_race_a_p___11', 'baseline_year_1_arm_1')_1.0 | -0.073 | 6.650E-14 | 13.177 |
| Demographics | ('demo_prnt_race_a_v2___11', 'baseline_year_1_arm_1')_0.0 | 0.066 | 8.735E-12 | 11.059 |
| Demographics | ('demo_prnt_race_a_v2___11', 'baseline_year_1_arm_1')_1.0 | -0.066 | 8.735E-12 | 11.059 |
| Socioeconomic | ('ethnicity', '')_2.0 | -0.064 | 4.083E-11 | 10.389 |
| Socioeconomic | ('genetic_af_african', 'baseline_year_1_arm_1') | -0.075 | 1.485E-14 | 13.828 |
| Socioeconomic | ('genetic_af_european', 'baseline_year_1_arm_1') | 0.049 | 4.524E-07 | 6.344 |
| Social Adjustment | ('mex_american15_p', 'baseline_year_1_arm_1')_5.0 | -0.044 | 7.708E-06 | 5.113 |
| Social Adjustment | ('meim_ethnic_id_p', 'baseline_year_1_arm_1')_5.0 | -0.059 | 1.500E-09 | 8.824 |
| Substance Use | ('tlfb_age_calc_inmonths', 'baseline_year_1_arm_1') | -0.099 | 1.526E-24 | 23.816 |
| Substance Use | ('tlfb_age_month', 'baseline_year_1_arm_1')_11.0 | -0.046 | 1.848E-06 | 5.733 |
| Substance Use | ('tlfb_age', 'baseline_year_1_arm_1')_9.0 | 0.084 | 4.084E-18 | 17.389 |
| Substance Use | ('tlfb_age', 'baseline_year_1_arm_1')_10.0 | -0.085 | 2.342E-18 | 17.630 |
| Phys Exam | ('hormone_scr_dhea_rep2', 'baseline_year_1_arm_1') | -0.062 | 1.459E-10 | 9.836 |
| Phys Exam | ('hormone_scr_ert_mean', 'baseline_year_1_arm_1') | -0.061 | 3.295E-10 | 9.482 |
| Phys Exam | ('hormone_scr_ert_rep1', 'baseline_year_1_arm_1') | -0.065 | 2.825E-11 | 10.549 |
| Phys Exam | ('hormone_scr_ert_rep2', 'baseline_year_1_arm_1') | -0.061 | 4.690E-10 | 9.329 |
| Phys Characteristics | ('pds_2_p', 'baseline_year_1_arm_1')_1.0 | 0.075 | 1.758E-14 | 13.755 |
| Phys Characteristics | ('pds_2_p', 'baseline_year_1_arm_1')_3.0 | -0.065 | 1.894E-11 | 10.723 |
| Phys Characteristics | ('pds_3_p', 'baseline_year_1_arm_1')_1.0 | 0.067 | 7.796E-12 | 11.108 |
| Phys Characteristics | ('pds_3_p', 'baseline_year_1_arm_1')_3.0 | -0.054 | 2.208E-08 | 7.656 |
| **Subtype 4** | | | | |
| **cat_id** | **phe_name** | **r_value** | **p_value** | **-logp_value** |
| Demographics | ('interview_age', 'baseline_year_1_arm_1') | -0.052 | 8.234E-08 | 7.084 |
| Demographics | ('interview_age', 'screener_arm_1') | -0.052 | 8.234E-08 | 7.084 |
| Demographics | ('demo_race_a_p___10', 'baseline_year_1_arm_1')_0.0 | -0.048 | 7.511E-07 | 6.124 |
| Demographics | ('demo_race_a_p___10', 'baseline_year_1_arm_1')_1.0 | 0.048 | 7.511E-07 | 6.124 |
| Demographics | ('demo_race_a_p___25', 'baseline_year_1_arm_1')_0.0 | 0.044 | 6.526E-06 | 5.185 |
| Demographics | ('demo_race_a_p___25', 'baseline_year_1_arm_1')_1.0 | -0.044 | 6.526E-06 | 5.185 |
| Demographics | ('demo_ethn_v2', 'baseline_year_1_arm_1')_1.0 | -0.056 | 1.110E-08 | 7.955 |
| Demographics | ('demo_ethn_v2', 'baseline_year_1_arm_1')_2.0 | 0.056 | 1.110E-08 | 7.955 |
| Demographics | ('demo_prnt_race_a_v2___10', 'baseline_year_1_arm_1')_0.0 | -0.047 | 1.607E-06 | 5.794 |
| Demographics | ('demo_prnt_race_a_v2___10', 'baseline_year_1_arm_1')_1.0 | 0.047 | 1.607E-06 | 5.794 |
| Demographics | ('demo_prnt_ethn_v2', 'baseline_year_1_arm_1')_1.0 | -0.048 | 7.135E-07 | 6.147 |
| Demographics | ('demo_prnt_ethn_v2', 'baseline_year_1_arm_1')_2.0 | 0.048 | 7.135E-07 | 6.147 |
| Socioeconomic | ('ethnicity', '')_1.0 | 0.065 | 2.272E-11 | 10.644 |
| Socioeconomic | ('ethnicity', '')_3.0 | -0.056 | 8.124E-09 | 8.090 |
| Socioeconomic | ('genetic_af_european', 'baseline_year_1_arm_1') | 0.066 | 8.599E-12 | 11.066 |
| Socioeconomic | ('genetic_af_american', 'baseline_year_1_arm_1') | -0.081 | 1.196E-16 | 15.922 |
| Socioeconomic | ('reshist_addr1_adi_edu_h', 'baseline_year_1_arm_1') | 0.045 | 4.605E-06 | 5.337 |
| Socioeconomic | ('reshist_addr1_svi_sin_20142018', 'baseline_year_1_arm_1') | -0.047 | 1.321E-06 | 5.879 |
| Cognitive | ('pea_wiscv_trs', 'baseline_year_1_arm_1') | 0.056 | 6.748E-09 | 8.171 |
| Cognitive | ('pea_wiscv_tss', 'baseline_year_1_arm_1') | 0.062 | 1.517E-10 | 9.819 |
| Behavior | ('cbcl_q53_p', 'baseline_year_1_arm_1')_0.0 | 0.053 | 4.500E-08 | 7.347 |
| Behavior | ('cbcl_q55_p', 'baseline_year_1_arm_1')_0.0 | 0.082 | 4.024E-17 | 16.395 |
| Behavior | ('cbcl_q55_p', 'baseline_year_1_arm_1')_1.0 | -0.053 | 4.073E-08 | 7.390 |
| Behavior | ('cbcl_q55_p', 'baseline_year_1_arm_1')_2.0 | -0.064 | 3.723E-11 | 10.429 |
| Behavior | ('cbcl_q102_p', 'baseline_year_1_arm_1')_0.0 | 0.045 | 4.743E-06 | 5.324 |
| Behavior | ('cbcl_q102_p', 'baseline_year_1_arm_1')_1.0 | -0.045 | 4.174E-06 | 5.379 |
| Activity | ('sai_p_activities___6', 'baseline_year_1_arm_1')_0.0 | -0.043 | 7.859E-06 | 5.105 |
| Activity | ('sai_p_activities___6', 'baseline_year_1_arm_1')_1.0 | 0.043 | 7.859E-06 | 5.105 |
| Activity | ('sai_ss_gym_nmonth_p', 'baseline_year_1_arm_1')_0.0 | -0.044 | 5.324E-06 | 5.274 |
| Activity | ('sai_ss_gym_perwk_p', 'baseline_year_1_arm_1')_1.0 | 0.050 | 2.383E-07 | 6.623 |
| Social Adjustment | ('kbi_p_how_well_c_school', 'baseline_year_1_arm_1')_1.0 | 0.046 | 2.267E-06 | 5.645 |
| Social Adjustment | ('kbi_p_how_well_c_school', 'baseline_year_1_arm_1')_3.0 | -0.049 | 4.817E-07 | 6.317 |
| Social Adjustment | ('kbi_p_grades_in_school', 'baseline_year_1_arm_1')_1.0 | 0.044 | 6.791E-06 | 5.168 |
| Social Adjustment | ('kbi_p_c_spec_serv___4', 'baseline_year_1_arm_1')_0.0 | 0.048 | 8.740E-07 | 6.058 |
| Social Adjustment | ('kbi_p_c_spec_serv___4', 'baseline_year_1_arm_1')_1.0 | -0.048 | 8.740E-07 | 6.058 |
| Social Adjustment | ('meim_ethnic_id_p', 'baseline_year_1_arm_1')_1.0 | 0.046 | 2.343E-06 | 5.630 |
| Social Adjustment | ('meim_ethnic_id_p', 'baseline_year_1_arm_1')_4.0 | -0.048 | 1.032E-06 | 5.986 |
| Substance Use | ('tlfb_age_calc_inmonths', 'baseline_year_1_arm_1') | -0.050 | 2.919E-07 | 6.535 |
| Questionnaire | ('bisbas17_y', 'baseline_year_1_arm_1')_1.0 | 0.045 | 4.605E-06 | 5.337 |
| Questionnaire | ('screen2_wkdy_y', 'baseline_year_1_arm_1')_0.0 | 0.046 | 2.929E-06 | 5.533 |
| Questionnaire | ('screen8_wknd_y', 'baseline_year_1_arm_1')_0.0 | 0.044 | 5.166E-06 | 5.287 |
| **Subtype 5** | | | | |
| **cat_id** | **phe_name** | **r_value** | **p_value** | **-logp_value** |
| Demographics | ('sex_official', '')_F | -0.165 | 1.784E-65 | 64.749 |
| Demographics | ('sex_official', '')_M | 0.165 | 1.784E-65 | 64.749 |
| Demographics | ('demo_sex_v2', 'baseline_year_1_arm_1')_1.0 | 0.165 | 3.271E-65 | 64.485 |
| Demographics | ('demo_sex_v2', 'baseline_year_1_arm_1')_2.0 | -0.165 | 3.706E-65 | 64.431 |
| Demographics | ('demo_gender_id_v2', 'baseline_year_1_arm_1')_1.0 | 0.164 | 1.242E-64 | 63.906 |
| Demographics | ('demo_gender_id_v2', 'baseline_year_1_arm_1')_2.0 | -0.165 | 1.634E-65 | 64.787 |
| Demographics | ('demo_race_a_p___11', 'baseline_year_1_arm_1')_0.0 | 0.107 | 4.838E-28 | 27.315 |
| Demographics | ('demo_race_a_p___11', 'baseline_year_1_arm_1')_1.0 | -0.107 | 4.838E-28 | 27.315 |
| Demographics | ('demo_prnt_race_a_v2___11', 'baseline_year_1_arm_1')_0.0 | 0.089 | 4.990E-20 | 19.302 |
| Demographics | ('demo_prnt_race_a_v2___11', 'baseline_year_1_arm_1')_1.0 | -0.089 | 4.990E-20 | 19.302 |
| Socioeconomic | ('ethnicity', '')_2.0 | -0.083 | 1.032E-17 | 16.986 |
| Socioeconomic | ('ethnicity', '')_3.0 | 0.043 | 7.948E-06 | 5.100 |
| Socioeconomic | ('genetic_af_african', 'baseline_year_1_arm_1') | -0.103 | 3.991E-26 | 25.399 |
| Socioeconomic | ('genetic_af_european', 'baseline_year_1_arm_1') | 0.051 | 2.047E-07 | 6.689 |
| Socioeconomic | ('genetic_af_american', 'baseline_year_1_arm_1') | 0.061 | 2.625E-10 | 9.581 |
| Activity | ('sai_p_activities___0', 'baseline_year_1_arm_1')_0.0 | 0.110 | 7.986E-30 | 29.098 |
| Activity | ('sai_p_activities___0', 'baseline_year_1_arm_1')_1.0 | -0.110 | 7.986E-30 | 29.098 |
| Activity | ('sai_p_activities___1', 'baseline_year_1_arm_1')_0.0 | -0.056 | 6.495E-09 | 8.187 |
| Activity | ('sai_p_activities___1', 'baseline_year_1_arm_1')_1.0 | 0.056 | 6.495E-09 | 8.187 |
| Activity | ('sai_p_activities___6', 'baseline_year_1_arm_1')_0.0 | 0.058 | 1.916E-09 | 8.717 |
| Activity | ('sai_p_activities___6', 'baseline_year_1_arm_1')_1.0 | -0.058 | 1.916E-09 | 8.717 |
| Activity | ('sai_p_activities___10', 'baseline_year_1_arm_1')_0.0 | -0.049 | 4.718E-07 | 6.326 |
| Activity | ('sai_p_activities___10', 'baseline_year_1_arm_1')_1.0 | 0.049 | 4.718E-07 | 6.326 |
| Activity | ('sai_ss_dance_nyr_p', 'baseline_year_1_arm_1')_0.0 | 0.110 | 8.279E-30 | 29.082 |
| Activity | ('sai_ss_dance_nyr_p', 'baseline_year_1_arm_1')_1.0 | -0.065 | 2.211E-11 | 10.655 |
| Activity | ('sai_ss_dance_nyr_p', 'baseline_year_1_arm_1')_2.0 | -0.051 | 1.382E-07 | 6.859 |
| Activity | ('sai_ss_dance_nmonth_p', 'baseline_year_1_arm_1')_0.0 | 0.109 | 4.934E-29 | 28.307 |
| Activity | ('sai_ss_dance_nmonth_p', 'baseline_year_1_arm_1')_9.0 | -0.046 | 2.523E-06 | 5.598 |
| Activity | ('sai_ss_dance_perwk_p', 'baseline_year_1_arm_1')_0.0 | 0.111 | 4.035E-30 | 29.394 |
| Activity | ('sai_ss_dance_perwk_p', 'baseline_year_1_arm_1')_1.0 | -0.072 | 1.483E-13 | 12.829 |
| Activity | ('sai_ss_dance_perwk_p', 'baseline_year_1_arm_1')_2.0 | -0.059 | 1.733E-09 | 8.761 |
| Activity | ('sai_ss_dance_tspent_p', 'baseline_year_1_arm_1')_0.0 | 0.110 | 9.080E-30 | 29.042 |
| Activity | ('sai_ss_dance_tspent_p', 'baseline_year_1_arm_1')_3.0 | -0.046 | 2.002E-06 | 5.699 |
| Activity | ('sai_ss_dance_tspent_p', 'baseline_year_1_arm_1')_4.0 | -0.063 | 1.186E-10 | 9.926 |
| Activity | ('sai_ss_dance_tspent_p', 'baseline_year_1_arm_1')_5.0 | -0.044 | 7.343E-06 | 5.134 |
| Activity | ('sai_ss_base_nyr_p', 'baseline_year_1_arm_1')_0.0 | -0.057 | 4.490E-09 | 8.348 |
| Activity | ('sai_ss_base_nyr_p', 'baseline_year_1_arm_1')_4.0 | 0.046 | 2.914E-06 | 5.535 |
| Activity | ('sai_ss_base_nmonth_p', 'baseline_year_1_arm_1')_0.0 | -0.057 | 5.412E-09 | 8.267 |
| Activity | ('sai_ss_base_perwk_p', 'baseline_year_1_arm_1')_0.0 | -0.057 | 3.749E-09 | 8.426 |
| Activity | ('sai_ss_base_tspent_p', 'baseline_year_1_arm_1')_0.0 | -0.058 | 3.094E-09 | 8.510 |
| Activity | ('sai_ss_gym_nyr_p', 'baseline_year_1_arm_1')_0.0 | 0.059 | 1.752E-09 | 8.757 |
| Activity | ('sai_ss_gym_nmonth_p', 'baseline_year_1_arm_1')_0.0 | 0.059 | 9.840E-10 | 9.007 |
| Activity | ('sai_ss_gym_perwk_p', 'baseline_year_1_arm_1')_0.0 | 0.058 | 1.943E-09 | 8.711 |
| Activity | ('sai_ss_gym_perwk_p', 'baseline_year_1_arm_1')_1.0 | -0.050 | 3.246E-07 | 6.489 |
| Activity | ('sai_ss_gym_tspent_p', 'baseline_year_1_arm_1')_0.0 | 0.058 | 1.846E-09 | 8.734 |
| Activity | ('sai_ss_m_arts_nyr_p', 'baseline_year_1_arm_1')_0.0 | -0.049 | 4.197E-07 | 6.377 |
| Activity | ('sai_ss_m_arts_nmonth_p', 'baseline_year_1_arm_1')_0.0 | -0.045 | 3.724E-06 | 5.429 |
| Activity | ('sai_ss_m_arts_perwk_p', 'baseline_year_1_arm_1')_0.0 | -0.048 | 6.526E-07 | 6.185 |
| Activity | ('sai_ss_m_arts_perwk_p', 'baseline_year_1_arm_1')_2.0 | 0.051 | 1.316E-07 | 6.881 |
| Activity | ('sai_ss_m_arts_tspent_p', 'baseline_year_1_arm_1')_0.0 | -0.048 | 9.892E-07 | 6.005 |
| Social Adjustment | ('pmq_y_ss_mean', 'baseline_year_1_arm_1') | -0.049 | 5.819E-07 | 6.235 |
| Social Adjustment | ('meim_ethnic_id_p', 'baseline_year_1_arm_1')_5.0 | -0.075 | 1.724E-14 | 13.763 |
| Phys Exam | ('hormone_scr_dhea_rep2', 'baseline_year_1_arm_1') | -0.044 | 6.249E-06 | 5.204 |
| Phys Characteristics | ('pds_sex_y', 'baseline_year_1_arm_1')_1.0 | 0.163 | 6.979E-64 | 63.156 |
| Phys Characteristics | ('pds_sex_y', 'baseline_year_1_arm_1')_2.0 | -0.163 | 6.979E-64 | 63.156 |
| Phys Characteristics | ('pds_2_p', 'baseline_year_1_arm_1')_1.0 | 0.069 | 9.163E-13 | 12.038 |
| Phys Characteristics | ('pds_2_p', 'baseline_year_1_arm_1')_3.0 | -0.061 | 3.961E-10 | 9.402 |
| Phys Characteristics | ('pds_3_p', 'baseline_year_1_arm_1')_1.0 | 0.072 | 1.620E-13 | 12.790 |
| Phys Characteristics | ('pds_3_p', 'baseline_year_1_arm_1')_2.0 | -0.047 | 1.725E-06 | 5.763 |
| Phys Characteristics | ('pds_3_p', 'baseline_year_1_arm_1')_3.0 | -0.047 | 1.181E-06 | 5.928 |
| Questionnaire | ('screen13_y', 'baseline_year_1_arm_1')_0.0 | -0.054 | 2.448E-08 | 7.611 |
| Questionnaire | ('screen10_wknd_y', 'baseline_year_1_arm_1')_0.0 | 0.053 | 5.928E-08 | 7.227 |
